# Supplementary material for: Disclosing azole resistance mechanisms in resistant Candida glabrata strains encoding wild-type or gain-of-function CgPDR1 alleles through comparative genomics and transcriptomics
Source: G3 (Bethesda). 2022 May 9;12(7):jkac110. doi: 10.1093/g3journal/jkac110 (PMC9258547; doi:10.1093/g3journal/jkac110)
Supplement: jkac110_Supplementary_Material [file jkac110_supplementary_material.xlsx]

## Sheet: Table S1
Table S1. Set of clinical Candida strains used in our study including both the lab strains and the clinical isolates. For the lab strains we indicate the corresponding genotype while for the clinical strains we include the description of their name, the species identification and the niche where they were isolated from. Clinical strains considered resistant to FLC and/or VC are highlighted in gre…
Clinical isolate description			Reference	MIC FLC	MIC VC
Strain	Origin	Species
CBS138/ATCC 2001	Feces	C. glabrata reference strain	CBS-KNAW Fungal Biodiversity Centre
SKY107	Lab strain	C. glabrata devoid of CgPDR1 gene (genotype: pdr1Δ::natMX his3Δ::FRT leu2Δ::FRT trp1Δ::FRT ura3Δ(−85 +932)::Tn903)	Khakhina et al, 2019
LYS2	Lab strain	C. glabrata devoid of CgPDR1 and CgMED15A/CgGAL11A genes (genotype: pdr1Δ::natMX his3Δ::FRT leu2Δ::FRT trp1Δ::FRT ura3Δ(−85 +932)::Tn903) med15A/gal11AD::HIS3MX6	Khakhina et al, 2019
FFUL443	Bronchial lavage	Candida glabrata	Salazar et al., 2017	>64 (R)	2 (R)
FFUL674	Bronchial lavage	Candida glabrata	Salazar et a.,, 2017	>64 (R)	2 (R)
FFUL830	Urine	Candida glabrata	Salazar et al., 2017	>64 (R)	2 (R)
FFUL887	Urine	Candida glabrata	Salazar et al., 2017	>64 (R)	2 (R)
IST A1	Urine	Candida albicans	This study	<4	<0,25
IST A2	Vaginal exudate	Candida albicans	This study	<4	<0,25
IST A3	Urethra	Candida albicans	This study	<4	<0,25
IST A4	Vaginal exudate	Candida albicans	This study	<4	<0,25
IST A5	Vaginal exudate	Candida albicans	This study	<4	<0,25
IST A6	Vaginal exudate	Candida glabrata	This study	<32	<1
IST A7	Urine	Candida tropicalis	This study
IST A8	Urine	Candida albicans	This study	16 (R)	>8 (R)
IST A9	Urine	Candida albicans	This study	<4	<0,25
IST A10	Central venous catheter/Hemoculture	Candida albicans	This study	<4	<0,25
IST A11	Hemoculture	Candida krusei	This study
IST A12	Central venous catheter/Hemoculture	Candida tropicalis	This study
IST A13	Urine	Candida tropicalis	This study
IST A14	Bile	Candida glabrata	This study	<32	<1
IST A15	Hemoculture	Candida krusei	This study
IST A16	Hemoculture	Candida krusei	This study
IST A17	Urine	Candida parapsilosis	This study
IST A18	Urine	Candida albicans	This study	<4	<0,25
IST A19	Urine	Candida albicans	This study	<4	<0,25
IST A20	Urine	Candida tropicalis	This study
IST A21	Urine	Candida albicans	This study	<4	<0,25
IST A22	Bronchial Lavage	Candida albicans	This study	<4	<0,25
IST A23	Bile	Candida albicans	This study	<4	<0,25
IST A24	Hemoculture	Candida albicans	This study	<4	<0,25
IST A25	Hemoculture	Candida glabrata	This study	<32	<1
IST A26	Hemoculture	Candida albicans	This study	<4	<0,25
IST A27	Hemoculture	Candida albicans	This study	<4	<0,25
IST A28	Hemoculture	Candida glabrata	This study	<32	<1
IST A29	Urine	Candida glabrata	This study	<32	<1
IST A30	Urine	Candida tropicalis	This study
IST A31	Urine	Candida lusitaniae	This study
IST A32	Pus	Candida tropicalis	This study
IST A33	Biopsy	Candida albicans	This study	<4	<0,25
IST A34	Ascitic Fluid	Candida tropicalis	This study
IST A35	Urine	Candida tropicalis	This study
IST A36	Hemoculture	Candida albicans	This study	<4	<0,25
IST A37	Hemoculture	Candida albicans	This study	<4	<0,25
IST A38	Urine	Candida albicans	This study	<4	<0,25
IST A39	Urine	Candida albicans	This study	<4	<0,25
IST A40	Urine	Candida albicans	This study	<4	<0,25
IST A41	Urine	Candida albicans	This study	<4	<0,25
IST A42	Biliary Fluid	Candida albicans + Candida glabrata	This study	<32	<1
IST A43	Urine	Candida glabrata	This study	<32	<1
IST A44	Urine	Candida albicans	This study	<4	<0,25
IST A45	Urine	Candida glabrata	This study	<32	<1
IST A46	Bronchial Lavage	Candida albicans	This study	<4	<0,25
IST A47	Urine	Candida tropicalis	This study
IST A48	Urine	Candida albicans + Candida glabrata	This study	<32	<1
IST A49	Vaginal exudate	Candida tropicalis	This study
IST A50	Urine	Candida glabrata	This study	<32	<1
IST A51	Urine	Candida tropicalis	This study
IST A52	Hemoculture	Candida albicans	This study	<4	<0,25
IST A53	Bronchial Lavage	Candida albicans	This study	<4	<0,25
IST A54	Hemoculture	Candida albicans	This study	<4	<0,25
IST A55	Urine	Candida tropicalis	This study
IST A56	Bronchial Lavage	Candida glabrata	This study	>64 (R)	>8 (R)
IST A57	Bronchial Lavage	Candida albicans	This study	<4	<0,25
IST A58	Hemoculture	Candida albicans	This study	<4	<0,25
IST A59	Exs, superficial harvested by swab	Candida albicans	This study	<4	<0,25
IST A60	Urine	Candida albicans	This study	<4	<0,25
IST A61	Urine	Candida parapsilosis	This study
IST A62	Bronchial Lavage	Candida albicans	This study	<4	<0,25
IST A63	Urine	Candida tropicalis	This study
IST A64	Hemoculture	Candida glabrata	This study	<32	<1
IST A65	Urine	Candida albicans	This study	<4	<0,25
IST A66	Urine	Candida glabrata	This study	<32	<1
IST A67	Urine	Candida albicans	This study	<4	<0,25
IST A68	Hemoculture	Candida tropicalis	This study
IST A69	Ascitic Fluid	Candida glabrata	This study	<32	<1
IST A70	Hemoculture/Central Venous Catheter	Candida parapsilosis	This study
IST A71	Hemoculture	Candida albicans	This study	<4	<0,25
IST A72	Hemoculture	Candida albicans	This study	<4	<0,25
IST A73	Bronchial Lavage	Candida glabrata	This study	<32	<1
IST A74	Urine	Candida albicans	This study	<4	<0,25
IST A75	Urine	Candida albicans	This study	<4	<0,25
IST A76	Hemoculture	Candida albicans	This study	<4	<0,25
IST A77	Bronchial Lavage	Candida albicans	This study	<4	<0,25
IST B1	Vaginal exudate	Candida albicans	This study	<4	<0,25
IST B2	Vaginal exudate	Candida krusei	This study
IST B3	Vaginal exudate	Candida albicans	This study	<4	<0,25
IST B4	Vaginal exudate	Candida albicans	This study	<4	<0,25						474
IST B5	Vaginal exudate	Candida albicans	This study	<4	<0,25
IST B6	Vaginal exudate	Candida albicans	This study	<4	<0,25
IST B7	Vaginal exudate	Candida albicans	This study	<4	<0,25
IST B8	Vaginal exudate	Candida albicans	This study	<4	<0,25
IST B9	Pus	Candida albicans var africana	This study	<4	<0,25
IST B11	Urine	Candida tropicalis	This study
IST B12	Vaginal exudate	Candida albicans var africana	This study	<4	<0,25
IST B14	Urine	Candida albicans	This study	<4	<0,25
IST B15	Vaginal exudate	Candida albicans	This study	>64 (R)	1 (R)
IST B16	Vaginal exudate	Candida albicans	This study	16 (R)	<0,25 (S)
IST B17	Urine	Candida albicans	This study	<4	<0,25
IST B18	Pus	Candida albicans	This study	<4	<0,25
IST B19	Urine	Candida albicans	This study	<4	<0,25
IST B20	Urine	Candida albicans	This study	<4	<0,25
IST B21	Urine	Candida albicans	This study	<4	<0,25
IST B22	Vaginal exudate	Candida glabrata	This study	<32	<1
IST B23	Vaginal exudate	Candida krusei	This study
IST B24	Vaginal exudate	Candida albicans	This study	<4	<0,25
IST B25	Vaginal exudate	Candida albicans	This study	<4	<0,25
IST B26	Hemoculture	Candida albicans	This study	<4	<0,25
IST B27	Pus	Candida albicans	This study	<4	<0,25
IST B28	Catheter	Candida albicans	This study	<4	<0,25
IST B29	Urine	Candida albicans	This study	<4	<0,25
IST B30	Vaginal exudate	Candida albicans	This study	32 (R)	1 (R)
IST B31	Vaginal exudate	Candida albicans	This study	<4	<0,25
IST B32	Urine	Candida albicans	This study	16 (R)	1 (R)
IST B33	Vaginal exudate	Candida albicans	This study	<4	<0,25
IST B34	Vaginal exudate	Candida albicans	This study	<4	<0,25
IST B35	Vaginal exudate	Candida albicans	This study
IST B36	Vaginal exudate	Candida albicans	This study	<4	<0,25
IST B37	Urine	Candida norvegensis	This study
IST B38	Urine	Candida albicans	This study	<4	<0,25
IST B39	Urine	Candida albicans	This study	<4	<0,25
IST B40	Vaginal exudate	Candida albicans	This study	<4	<0,25
IST B41	Urine	Candida albicans	This study	<4	<0,25
IST B42	Urine	Candida albicans	This study	<4	<0,25
IST B43	Vaginal exudate	Candida albicans var africana	This study	<4	<0,25
IST B44	Vaginal exudate	Candida albicans	This study	<4	<0,25
IST B45	Urine	Candida albicans	This study	16 (R)	0,5 (R)
IST B46	Pus	Candida tropicalis	This study
IST B47	Hemoculture	Candida glabrata	This study	<32	<1
IST B48	Vaginal exudate	Candida albicans	This study	<4	<0,25
IST B49	Hemoculture	Candida glabrata	This study	<32	<1
IST B50	Vaginal exudate	Candida albicans	This study	32 (R)	2 (R)
IST B51	Urine	Candida albicans	This study	<4	<0,25
IST B52	Urine	Candida albicans	This study	<4	<0,25
IST B53	Pus	Candida albicans	This study	16 (R)	1 (R)
IST B54	Urine	Candida krusei	This study
IST B55	Urine	Candida albicans	This study	<4	<0,25
IST B56	Urine	Candida albicans	This study	>64 (R)	>8 (R)
IST B57	Urine	Candida albicans	This study	<4	<0,25
IST B58	Vaginal exudate	Candida albicans	This study	<4	<0,25
IST B59	Vaginal exudate	Candida glabrata	This study	<32	<1
IST B60	Hemoculture	Candida glabrata	This study
IST B61	Pus	Candida albicans	This study	16 (R)	0,5 (R)
IST B62	Vaginal exudate	Candida albicans	This study	<4	<0,25
IST B63	Vaginal exudate	Candida albicans	This study	<4	<0,25
IST B64	Urine	Candida albicans	This study	<4	<0,25
IST B65	Vaginal exudate	Candida albicans	This study	<4	<0,25
IST B66	Urine	Candida glabrata	This study	<32	<1
IST B67	Skin appendages	Candida parapsilosis	This study
IST B68	Pus	Candida glabrata	This study	<32	<1
IST B69	Vaginal exudate	Candida albicans var africana	This study	32 (R)	1 (R)
IST B70	Urine	Candida albicans	This study	<4	<0,25
IST B71	Vaginal exudate	Candida glabrata	This study	<32	<1
IST B72	Vaginal exudate	Candida albicans	This study	<4	<0,25
IST B73	Vaginal exudate	Candida albicans	This study	16 (R)	0,5 (R)
IST B74	Pus	Candida albicans	This study
IST B75	Pus	Candida albicans	This study	<4	<0,25
IST B76	Urinal	Candida albicans	This study	<4	<0,25
IST B77	Vaginal exudate	Candida albicans	This study	<4	<0,25
IST B78	Urine	Candida parapsilosis	This study
IST B79	Urine	Candida tropicalis	This study
IST B80	Vaginal exudate	Candida albicans	This study	<4	<0,25
IST B81	Vaginal exudate	Candida albicans	This study	<4	<0,25
IST B82	Vaginal exudate	Candida albicans	This study	<4	<0,25
IST B83	Urine	Candida albicans	This study	<4	<0,25
IST B84	Pus	Candida albicans	This study	<4	<0,25
IST B85	Vaginal exudate	Candida albicans	This study	<4	<0,25
IST B86	Catheter	Candida albicans	This study	<4	<0,25
IST B87	Catheter	Candida parapsilosis	This study
IST B88	Urine	Candida albicans	This study	<4	<0,25
IST B89	Urine	Candida albicans	This study	<4	<0,25
IST B90	-	Candida albicans	This study	<4	<0,25
IST B91	Skin appendages	Candida parapsilosis	This study
IST B92	Vaginal exudate	Candida albicans	This study	<4	<0,25
IST B93	Urine	Candida albicans	This study	<4	<0,25
IST B94	Vaginal exudate	Candida albicans	This study	<4	<0,25
IST B95	Vaginal exudate	Candida krusei	This study
IST B96	Vaginal exudate	Candida albicans	This study	<4	<0,25
IST B97	Vaginal exudate	Candida albicans	This study	<4	<0,25
IST B98	Urine	Candida tropicalis	This study
IST B99	Hemoculture	Candida albicans	This study	<4	<0,25
IST B100	Vaginal exudate	Candida glabrata	This study	<32	<1
IST B101	Pus	Candida glabrata	This study	<32	<1
IST B102	Vaginal exudate	Candida albicans	This study	<4	<0,25
IST B103	Urine	Candida albicans	This study	<4	<0,25
IST B104	Vaginal exudate	Candida albicans	This study	<4	<0,25
IST B105	Pus	Candida albicans	This study	<4	<0,25
IST B106	Urine	Candida albicans	This study	<4	<0,25
IST B107	Vaginal exudate	Candida albicans	This study	<4	<0,25
IST B108	Vaginal exudate	Candida glabrata	This study	<32	<1
IST B109	Urine	Candida albicans	This study	<4	<0,25
IST B110	Vaginal exudate	Candida albicans	This study	<4	<0,25
IST B111	Vaginal exudate	Candida albicans	This study	<4	<0,25
IST B112	Urine	Candida tropicalis	This study
IST B113	Urine	Candida albicans	This study	<4	<0,25
IST B114	Vaginal exudate	Candida albicans	This study
IST B115	Ocular exudate	Candida albicans	This study	<4	<0,25
IST B116	Urine	Candida albicans	This study
IST B117	Urine	Candida albicans	This study
IST B118	Hemoculture	Candida albicans	This study
IST B119	Vaginal exudate	Candida kefyr	This study
IST B120	Urine	Candida parapsilosis	This study
IST B121	Ocular exudate	Candida albicans	This study	<4	<0,25
IST B122	Vaginal exudate	Candida albicans	This study	<4	<0,25
IST B123	Urine	Candida glabrata	This study	<32	<1
IST B124	Vaginal exudate	Candida glabrata	This study	<32	<1
IST B125	Vaginal exudate	Candida albicans	This study	<4	<0,25
IST B126	Vaginal exudate	Candida albicans	This study	<4	<0,25
IST B127	Vaginal exudate	Candida albicans	This study
IST B128	Urine	Candida albicans	This study
IST B129	Urine	Candida albicans	This study	<4	<0,25
IST B130	Urine	Candida parapsilosis	This study
IST B131	Vaginal exudate	Candida glabrata	This study	<32	<1
IST B132	Vaginal exudate	Candida albicans	This study	<4	<0,25
IST B134	Vaginal exudate	Candida albicans	This study
IST B136	Pus	Candida tropicalis	This study
IST B137	Urine	Candida albicans	This study	<4	<0,25
IST B138	Vaginal exudate	Candida glabrata	This study	<32	<1
IST B139	Vaginal exudate	Candida albicans	This study
IST B140	Pus	Candida albicans	This study
IST B141	Hemoculture	Candida albicans	This study
IST B142	Urine	Candida albicans	This study
IST B143	Urine	Candida albicans	This study	<4	<0,25
IST B144	Vaginal exudate	Candida albicans	This study
IST B145	Vaginal exudate	Candida albicans	This study	<4	<0,25
IST B146	Vaginal exudate	Candida albicans	This study
IST B147	Vaginal exudate	Candida albicans	This study
IST B148	Hemoculture	Candida albicans	This study
IST B149	Urine	Candida tropicalis	This study
IST B150	Vaginal exudate	Candida albicans	This study	<4	<0,25
IST B151	Urine	Candida parapsilosis	This study
IST B152	Vaginal exudate	Candida albicans	This study
IST B153	Urine	Candida albicans	This study
IST B154	Pus	Candida albicans	This study	<4	<0,25
IST B155	Urine	Candida albicans	This study	<4	<0,25
IST B156	Pus	Candida albicans	This study
IST B157	Vaginal exudate	Candida albicans	This study	<4	<0,25
IST B158	Vaginal exudate	Candida albicans	This study	<4	<0,25
IST B159	Vaginal exudate	Candida albicans	This study	<4	<0,25
IST B160	Hemoculture	Candida albicans	This study
IST B161	Biopsy	Candida parapsilosis	This study
IST B162	Vaginal exudate	Candida glabrata	This study
IST B163	Vaginal exudate	Candida albicans	This study
IST B164	Feces	Candida albicans	This study
IST B165	Vaginal exudate	Candida albicans	This study
IST B166	Vaginal exudate	Candida albicans	This study
IST B167	Vaginal exudate	Candida albicans	This study
IST B168	Vaginal exudate	Candida albicans	This study
IST B169	Vaginal exudate	Candida albicans	This study
IST B170	-	Candida albicans	This study
IST B171	Urine	Candida albicans	This study
IST B172	Vaginal exudate	Candida albicans	This study
IST B173	Vaginal exudate	Candida albicans	This study
IST B179	Vaginal exudate	Candida albicans	This study
IST B181	Vaginal exudate	Candida albicans	This study
IST B182	Vaginal exudate	Candida krusei	This study
IST B186	Vaginal exudate	Candida albicans	This study
IST B187	Vaginal exudate	Candida kefyr	This study
IST B188	Urine	Candida tropicalis	This study
IST B189	Hemoculture	Candida tropicalis	This study
IST B191	Vaginal exudate	Candida albicans	This study
IST B192	Urine	Candida glabrata	This study
IST B193	Vaginal exudate	Candida albicans	This study
IST B194	Vaginal exudate	Candida glabrata	This study
IST B195	Vaginal exudate	Candida albicans	This study
IST B197	Vaginal exudate	Candida glabrata	This study
IST B201	Vaginal exudate	Candida albicans	This study
IST B202	Vaginal exudate	Candida glabrata	This study
IST B203	Vaginal exudate	Candida albicans	This study
IST B204	Vaginal exudate	Candida albicans	This study
IST B205	Ascitic Liquid	Candida tropicalis	This study
IST B206	Urine	Candida tropicalis	This study
IST B207	Urine	Candida albicans	This study
IST B208	Urine	Candida albicans	This study
IST B209	Urine	Candida albicans	This study
IST B210	Vaginal exudate	Candida albicans	This study
IST B211	Urine	Candida albicans	This study
IST B212	-	Candida albicans	This study
IST B213	Hemoculture	Candida albicans	This study
IST B214	Vaginal exudate	Candida albicans	This study
IST B215	Vaginal exudate	Candida albicans	This study
IST B216	Vaginal exudate	Candida albicans	This study
IST B217	Feces	Candida albicans	This study
IST B218	Vaginal exudate	Candida glabrata	This study	>64 (R)	4 (R)
IST B219	Vaginal exudate	Candida glabrata	This study
IST B220	Urine	Candida albicans	This study
IST B221	Vaginal exudate	Candida albicans	This study
IST B222	Vaginal exudate	Candida albicans	This study
IST B223	Vaginal exudate	Candida glabrata	This study
IST B224	Vaginal exudate	Candida albicans	This study
IST B225	Vaginal exudate	Candida krusei	This study
IST B226	Vaginal exudate	Candida albicans	This study
IST B227	Vaginal exudate	Candida albicans	This study
IST B228	Vaginal exudate	Candida albicans	This study
IST B229	Vaginal exudate	Candida albicans	This study
IST B230	Vaginal exudate	Candida albicans	This study
IST B231	Urine	Candida lusitaniae	This study
IST B234	Vaginal exudate	Candida glabrata	This study
IST B235	Urine	Candida albicans	This study
IST B236	Pus	Candida albicans	This study
IST B237	Vaginal exudate	Candida albicans	This study
IST B238	Urine	Candida glabrata	This study
IST B239	Urine	Candida albicans	This study
IST B240	Urine	Candida albicans	This study
IST B241	Urine	Candida albicans	This study
IST B242	Vaginal exudate	Candida albicans	This study
IST B243	Vaginal exudate	Candida albicans	This study
IST B244	Vaginal exudate	Candida albicans	This study
IST B245	Urine	Candida albicans	This study
IST B246	Vaginal exudate	Candida glabrata	This study
IST B247	Vaginal exudate	Candida lusitaniae	This study
IST B248	Vaginal exudate	Candida albicans	This study
IST B249	Vaginal exudate	Candida albicans	This study
IST B250	Vaginal exudate	Candida glabrata	This study
IST B251	Vaginal exudate	Candida albicans	This study
IST B252	Vaginal exudate	Candida albicans	This study
IST B253	Pus	Candida albicans	This study
IST B254	Urine	Candida albicans	This study
IST B255	Vaginal exudate	Candida albicans	This study
IST B256	Vaginal exudate	Candida albicans	This study
IST B257	Vaginal exudate	Candida albicans	This study
IST B258	Skin appendages	Candida parapsilosis	This study
IST B259	Vaginal exudate	Candida albicans	This study
IST B260	Vaginal exudate	Candida parapsilosis	This study
IST B261	Urine	Candida kefyr	This study
IST B262	Vaginal exudate	Candida parapsilosis	This study
IST B265	Vaginal exudate	Candida albicans	This study
IST B266	Urine	Candida albicans	This study
IST B267	Ascitic Liquid	Candida albicans	This study
IST B268	Pus	Candida albicans	This study
IST B269	Pus	Candida albicans	This study
IST B270	Urine	Candida albicans	This study
IST B271	Vaginal exudate	Candida albicans	This study
IST B272	Vaginal exudate	Candida albicans	This study
IST B273	Vaginal exudate	Candida albicans	This study
IST B274	Vaginal exudate	Candida albicans	This study
IST B275	Vaginal exudate	Candida glabrata	This study
IST B276	Vaginal exudate	Candida albicans	This study
IST B277	Vaginal exudate	Candida glabrata	This study
IST B278	Vaginal exudate	Candida albicans	This study
IST B279	Urine	Candida albicans	This study
IST B280	Urine	Candida albicans	This study
IST B281	Urine	Candida albicans	This study	<4	<0,25
IST B282	Urine	Candida glabrata	This study	<32	<1
IST B283	Urine	Candida tropicalis	This study
IST B284	Vaginal exudate	Candida albicans	This study	8 (R)	<0,25 (S)
IST B285	-	Candida albicans	This study
IST B287	Vaginal exudate	Candida albicans	This study	<4	<0,25
IST B288	Vaginal exudate	Candida albicans	This study	<4	<0,25
IST B289	Vaginal exudate	Candida albicans	This study	<4	<0,25
IST B290	Pus	Candida albicans	This study	<4	<0,25
IST B291	Urine	Candida tropicalis	This study
IST B292	Vaginal exudate	Candida albicans	This study	<4	<0,25
IST B293	Vaginal exudate	Candida albicans	This study	<4	<0,25
IST B294	Vaginal exudate	Candida albicans	This study	<4	<0,25
IST B295	Urine	Candida albicans	This study	<4	<0,25
IST B296	Pus	Candida albicans	This study	<4	<0,25
IST B297	Vaginal exudate	Candida albicans	This study	<4	<0,25
IST B298	Hemoculture	Candida parapsilosis	This study
IST B299	Urine	Candida albicans	This study	<4	<0,25
IST B300	Vaginal exudate	Candida albicans	This study	<4	<0,25
IST B301	Catheter	Candida parapsilosis	This study
IST B303	Vaginal exudate	Candida albicans	This study	<4	<0,25
IST B304	Urine	Candida tropicalis	This study
IST B305	Vaginal exudate	Candida albicans	This study	<4	<0,25
IST B306	Vaginal exudate	Candida albicans	This study	<4	<0,25
IST B308	Urine	Candida albicans	This study	<4	<0,25
IST B309	Vaginal exudate	Candida albicans	This study	<4	<0,25
IST B310	Pus	Candida albicans	This study	<4	<0,25
IST B312	Vaginal exudate	Candida tropicalis	This study
IST B313	Vaginal exudate	Candida glabrata	This study
IST B314	Vaginal exudate	Candida albicans	This study	<4	<0,25
IST B315	Auricular exudate	Candida parapsilosis	This study
IST B316	Vaginal exudate	Candida glabrata	This study
IST B317	Urine	Candida glabrata	This study	<32	<1
IST B318	Hemoculture	Candida albicans	This study	<4	<0,25
IST B319	Vaginal exudate	Candida albicans	This study	<4	<0,25
IST B320	Urine	Candida glabrata	This study
IST B321	Vaginal exudate	Candida albicans	This study	<4	<0,25
IST B322	Vaginal exudate	Candida tropicalis	This study
IST B323	Vaginal exudate	Candida albicans	This study	<4	<0,25
IST B324	Vaginal exudate	Candida albicans	This study	<4	<0,25
IST B325	Vaginal exudate	Candida glabrata	This study	<32	<1
IST B326	Vaginal exudate	Candida albicans	This study	<4	<0,25
IST B327	Vaginal exudate	Candida glabrata	This study
IST B328	Vaginal exudate	Candida albicans	This study	<4	<0,25
IST B329	Vaginal exudate	Candida glabrata	This study	<32	<1
IST B330	Vaginal exudate	Candida albicans	This study	<4	<0,25
IST B331	Vaginal exudate	Candida albicans	This study	<4	<0,25
IST B332	Vaginal exudate	Candida krusei	This study
IST B333	Vaginal exudate	Candida albicans	This study	<4	<0,25
IST B334	Urine	Candida tropicalis	This study
IST B335	Urine	Candida albicans	This study
IST B336	Urine	Candida albicans	This study
IST B337	Bronchial Secretions	Candida parapsilosis	This study
IST B338	Pus	Candida albicans	This study	<4	<0,25
IST B339	Vaginal exudate	Candida albicans	This study	<4	<0,25
IST B340	Urine	Candida albicans	This study	<4	<0,25
IST B341	Vaginal exudate	Candida parapsilosis	This study
IST B342	Urine	Candida albicans	This study	<4	<0,25
IST B343	Vaginal exudate	Candida glabrata	This study	<32	<1
IST B344	Hemoculture	Candida glabrata	This study	<32	<1
IST B345	Pus	Candida albicans	This study	<4	<0,25
IST B348	Vaginal exudate	Candida krusei	This study
IST B349	Urine	Candida glabrata	This study	<32	<1
IST B350	Urine	Candida albicans	This study	<4	<0,25
IST B351	Urine	Candida albicans	This study	<4	<0,25
IST B352	Vaginal exudate	Candida albicans	This study	<4	<0,25
IST B353	Vaginal exudate	Candida albicans	This study	<4	<0,25
IST B354	Vaginal exudate	Candida albicans	This study	<4	<0,25
IST B355	Skin appendages	Candida parapsilosis	This study
IST B356	Hemoculture	Candida parapsilosis	This study
IST B362	Vaginal exudate	Candida albicans	This study	<4	<0,25
IST B363	Vaginal exudate	Candida albicans	This study	<4	<0,25
IST B364	Feces	Candida albicans	This study	<4	<0,25
IST B365	Vaginal exudate	Candida albicans	This study	<4	<0,25
IST B366	Vaginal exudate	Candida albicans	This study	<4	<0,25
IST B367	-	Candida albicans	This study
IST B368	Vaginal exudate	Candida albicans	This study	<4	<0,25
IST B369	Urine	Candida tropicalis	This study
IST B370	Vaginal exudate	Candida albicans	This study	<4	<0,25
IST B371	Urine	Candida tropicalis	This study
IST B372	Urine	Candida albicans	This study	<4	<0,25
IST B373	Vaginal exudate	Candida albicans	This study	<4	<0,25
IST B374	Vaginal exudate	Candida tropicalis	This study
IST B375	Urine	Candida albicans	This study
IST B376	Vaginal exudate	Candida glabrata	This study	<32	<1
IST B377	Urine	Candida albicans	This study
IST B378	Feces	Candida albicans	This study	<4	<0,25
IST B379	Vaginal exudate	Candida albicans	This study	<4	<0,25
IST B380	Vaginal exudate	Candida albicans	This study
IST B381	Vaginal exudate	Candida albicans	This study	<4	<0,25
IST B382	Vaginal exudate	Candida parapsilosis	This study
IST B383	Vaginal exudate	Candida albicans	This study
IST B384	Urine	Candida albicans	This study
IST B385	Vaginal exudate	Candida albicans	This study	<4	<0,25
IST B386	Vaginal exudate	Candida parapsilosis	This study
IST B387	Urine	Candida albicans	This study	<4	<0,25
IST B388	Vaginal exudate	Candida albicans	This study
IST B389	Vaginal exudate	Candida glabrata	This study	<32	<1
IST B391	Urine	Candida albicans	This study	<4	<0,25
IST B392	Urine	Candida albicans	This study	<4	<0,25
IST B393	Vaginal exudate	Candida albicans	This study	<4	<0,25
IST B394	Vaginal exudate	Candida albicans	This study	<4	<0,25
IST B395	Vaginal exudate	Candida albicans	This study
IST B396	Vaginal exudate	Candida albicans	This study
IST B397	Vaginal exudate	Candida albicans	This study	<4	<0,25
IST B398	Urine	Candida albicans	This study
IST B399	Urine	Candida albicans	This study
IST B400	Urine	Candida albicans	This study
IST B401	Vaginal exudate	Candida albicans	This study	<4	<0,25
IST B402	Vaginal exudate	Candida albicans	This study	<4	<0,25
IST B403	Vaginal exudate	Candida albicans	This study
IST B404	Urine	Candida albicans	This study
IST B407	Hemoculture	Candida albicans	This study
IST B408	Urine	Candida albicans	This study	<4	<0,25
IST B409	Urine	Candida albicans	This study	<4	<0,25
IST B410	Vaginal exudate	Candida albicans	This study	<4	<0,25
IST B411	Urine	Candida glabrata	This study
IST B412	Vaginal exudate	Candida tropicalis	This study
IST B413	Urine	Candida albicans	This study	<4	<0,25
IST B414	Urine	Candida albicans	This study	<4	<0,25
IST B415	Pus	Candida albicans	This study
IST B416	Vaginal exudate	Candida krusei	This study
IST B417	Vaginal exudate	Candida glabrata	This study
IST B418	Vaginal exudate	Candida albicans	This study	<4	<0,25
IST B419	Vaginal exudate	Candida albicans	This study	<4	<0,25
IST B420	Pus	Candida albicans	This study
IST B421	Pus	Candida albicans	This study
IST B422	Vaginal exudate	Candida albicans	This study
IST B423	Vaginal exudate	Candida albicans	This study	<4	<0,25
IST B424	Vaginal exudate	Candida albicans	This study
IST B425	Vaginal exudate	Candida albicans	This study
IST B426	Urine	Candida albicans	This study	<4	<0,25
IST B427	Vaginal exudate	Candida albicans	This study
IST B428	Vaginal exudate	Candida albicans	This study
IST B429	Vaginal exudate	Candida albicans	This study
IST B430	Vaginal exudate	Candida lusitaniae	This study
IST B431	Vaginal exudate	Candida glabrata	This study
IST B432	Pus	Candida albicans	This study
IST B434	Auricular exudate	Candida albicans	This study	<4	<0,25
IST B435	Vaginal exudate	Candida glabrata	This study
IST B436	Pus	Candida albicans	This study
IST B437	Urine	Candida glabrata	This study
IST B438	Vaginal exudate	Candida glabrata	This study
IST B439	Vaginal exudate	Candida albicans	This study	<4	<0,25
IST B440	Vaginal exudate	Candida glabrata	This study	<32	<1
IST B441	Vaginal exudate	Candida albicans	This study	<4	<0,25
IST B442	Vaginal exudate	Candida albicans	This study	<4	<0,25
IST B443	Vaginal exudate	Candida albicans	This study	<4	<0,25
IST B444	Vaginal exudate	Candida albicans	This study	<4	<0,25
IST B446	Vaginal exudate	Candida albicans	This study	<4	<0,25
IST B447	Vaginal exudate	Candida glabrata	This study
IST B448	Vaginal exudate	Candida albicans	This study	<4	<0,25
IST B449	Vaginal exudate	Candida albicans	This study
IST B450	-	Candida tropicalis	This study
IST B451	Vaginal exudate	Candida albicans	This study	<4	<0,25
IST B452	Vaginal exudate	Candida albicans	This study
IST B453	Vaginal exudate	Candida albicans	This study	<4	<0,25
IST B454	Urine	Candida glabrata	This study
IST B455	Vaginal exudate	Candida albicans	This study	<4	<0,25
IST B456	Vaginal exudate	Candida albicans	This study	<4	<0,25
IST B457	Vaginal exudate	Candida albicans	This study
IST B458	Urine	Candida albicans	This study	<4	<0,25
IST B459	Urine	Candida albicans	This study	<4	<0,25
IST B460	Auricular exudate	Candida albicans	This study	<4	<0,25
IST B461	Urine	Candida kefyr	This study
IST B462	Vaginal exudate	Candida albicans	This study	<4	<0,25
IST B463	Vaginal exudate	Candida albicans	This study	<4	<0,25
IST B464	Vaginal exudate	Candida albicans	This study	<4	<0,25
IST B465	Vaginal exudate	Candida krusei	This study
IST B466	Vaginal exudate	Candida glabrata	This study
IST B467	Vaginal exudate	Candida albicans	This study
IST B468	Urine	Candida albicans	This study
IST B469	Feces	Candida albicans	This study
IST B470	Vaginal exudate	Candida albicans	This study	<4	<0,25
IST B471	Vaginal exudate	Candida tropicalis	This study
IST B472	Vaginal exudate	Candida albicans	This study	<4	<0,25
IST B473	Vaginal exudate	Candida albicans	This study
IST B474	Skin appendages	Candida guilliermondii	This study
IST B475	Vaginal exudate	Candida albicans	This study	<4	<0,25
IST B476	Vaginal exudate	Candida albicans	This study
IST B477	Vaginal exudate	Candida albicans	This study
IST B478	Urine	Candida albicans	This study
IST B479	Vaginal exudate	Candida glabrata	This study
IST B480	Vaginal exudate	Candida albicans	This study	<4	<0,25
IST B481	Urine	Candida albicans	This study
IST B482	Bronchial Secretions	Candida albicans	This study	<4	<0,25
IST B483	Urine	Candida tropicalis	This study
IST B484	Vaginal exudate	Candida albicans	This study	<4	<0,25
IST B485	-	Candida tropicalis	This study
IST B486	Ascitic Liquid	Candida albicans	This study
IST B487	Vaginal exudate	Candida albicans	This study	<4	<0,25
IST B488	Vaginal exudate	Candida albicans	This study
IST B489	Vaginal exudate	Candida glabrata	This study
IST B490	Vaginal exudate	Candida albicans	This study	<4	<0,25
IST B491	Vaginal exudate	Candida albicans	This study
IST B493	Urine	Candida tropicalis	This study
IST B494	Vaginal exudate	Candida albicans	This study	<4	<0,25
IST B495	Biopsy	Candida albicans	This study	<4	<0,25
IST B496	Vaginal exudate	Candida albicans	This study
IST B498	Urine	Candida parapsilosis	This study
IST B500	Vaginal exudate	Candida albicans	This study
IST B501	Vaginal exudate	Candida albicans	This study	<4	<0,25
IST B502	Vaginal exudate	Candida albicans	This study
IST B503	Vaginal exudate	Candida krusei	This study
IST B504	Vaginal exudate	Candida albicans	This study	<4	<0,25
IST B505	Vaginal exudate	Candida albicans	This study	<4	<0,25
IST B509	Vaginal exudate	Candida albicans var africana	This study	<4	<0,25
IST B510	Pus	Candida tropicalis	This study
IST B511	Vaginal exudate	Candida albicans	This study	<4	<0,25
IST B513	Vaginal exudate	Candida albicans	This study	<4	<0,25
IST B514	Vaginal exudate	Candida parapsilosis	This study
IST B515	Vaginal exudate	Candida albicans	This study	<4	<0,25
IST B516	Vaginal exudate	Candida albicans	This study
IST B517	Vaginal exudate	Candida albicans var africana	This study	<4	<0,25
IST B519	Vaginal exudate	Candida albicans	This study	<4	<0,25
IST B520	Vaginal exudate	Candida glabrata	This study	<32	<1
IST B521	Urine	Candida glabrata	This study
IST B522	Urine	Candida albicans	This study	<4	<0,25
IST B523	Vaginal exudate	Candida krusei	This study
IST B524	Vaginal exudate	Candida albicans	This study
IST B525	Vaginal exudate	Candida albicans	This study
IST B526	Vaginal exudate	Candida albicans	This study
IST B527	Vaginal exudate	Candida albicans	This study
IST B528	Urine	Candida albicans	This study	<4	<0,25
IST B529	Vaginal exudate	Candida albicans	This study	<4	<0,25
IST B530	Urine	Candida albicans	This study
IST B531	Urine	Candida albicans	This study
IST B532	Vaginal exudate	Candida albicans	This study	<4	<0,25
IST B533	Vaginal exudate	Candida albicans	This study
IST B534	Vaginal exudate	Candida albicans	This study	<4	<0,25
IST B535	Vaginal exudate	Candida glabrata	This study	<32	<1
IST B536	Vaginal exudate	Candida albicans	This study
IST B537	Vaginal exudate	Candida tropicalis	This study
IST B538	Vaginal exudate	Candida albicans	This study	<4	<0,25
IST B539	Vaginal exudate	Candida glabrata	This study
IST B540	Urine	Candida kefyr	This study
IST B541	Vaginal exudate	Candida albicans	This study	<4	<0,25
IST B542	Vaginal exudate	Candida albicans	This study	<4	<0,25
IST B543	Vaginal exudate	Candida albicans	This study
IST B544	Bronchial Lavage	Candida albicans	This study
IST B545	Vaginal exudate	Candida albicans	This study
IST B546	Vaginal exudate	Candida albicans	This study
IST B547	Urine	Candida albicans	This study
IST B548	-	Candida albicans	This study
IST B549	Vaginal exudate	Candida parapsilosis	This study
IST B550	Vaginal exudate	Candida albicans	This study	<4	<0,25
IST B551	Vaginal exudate	Candida glabrata	This study	<32	<1
IST B552	Vaginal exudate	Candida parapsilosis	This study
IST B553	Vaginal exudate	Candida albicans	This study	<4	<0,25
IST B554	Vaginal exudate	Candida albicans	This study	<4	<0,25
IST B555	Vaginal exudate	Candida glabrata	This study	<32	<1
IST B556	Urine	Candida glabrata	This study	>64 (R)	4 (R)
IST B557	Vaginal exudate	Candida glabrata	This study	<32	<1
IST B558	Uretral exudate	Candida kefyr	This study
IST B559	Vaginal exudate	Candida albicans	This study	<4	<0,25
IST B560	Vaginal exudate	Candida albicans	This study	<4	<0,25
IST B562	Vaginal exudate	Candida albicans	This study	<4	<0,25
IST B563	Urine	Candida albicans	This study	<4	<0,25
IST B564	Urine	Candida albicans	This study	<4	<0,25
IST B565	Vaginal exudate	Candida albicans	This study	<4	<0,25
IST B566	Urine	Candida albicans	This study	<4	<0,25
IST B567	Vaginal exudate	Candida albicans	This study
IST B568	Vaginal exudate	Candida albicans	This study	<4	<0,25
IST B569	Vaginal exudate	Candida albicans	This study	<4	<0,25
IST B570	Vaginal exudate	Candida albicans	This study	<4	<0,25
IST B571	Urine	Candida albicans	This study	<4	<0,25
IST B572	Vaginal exudate	Candida albicans	This study
IST B573	Vaginal exudate	Candida parapsilosis	This study
IST B575	Vaginal exudate	Candida glabrata	This study	<32	<1
IST B576	Vaginal exudate	Candida albicans	This study	<4	<0,25
IST B577	Vaginal exudate	Candida albicans	This study	<4	<0,25
IST B579	Vaginal exudate	Candida albicans	This study	<4	<0,25
IST B581	Vaginal exudate	Candida albicans	This study
IST B582	Vaginal exudate	Candida albicans	This study	<4	<0,25
IST B583	Vaginal exudate	Candida tropicalis	This study
IST B584	Urine	Candida albicans	This study
IST B585	Vaginal exudate	Candida parapsilosis	This study
IST B586	Vaginal exudate	Candida albicans	This study
IST B587	Vaginal exudate	Candida albicans	This study
IST B588	Urine	Candida albicans	This study	<4	<0,25
IST B590	Vaginal exudate	Candida albicans	This study	<4	<0,25
IST B591	Urine	Candida krusei	This study
IST B592	Vaginal exudate	Candida albicans	This study	<4	<0,25
IST B593	Vaginal exudate	Candida glabrata	This study	<32	<1
IST B594	Vaginal exudate	Candida albicans	This study
IST B595	Vaginal exudate	Candida albicans	This study	<4	<0,25
IST B596	Urine	Candida krusei	This study
IST B597	Vaginal exudate	Candida albicans	This study
IST B598	Vaginal exudate	Candida albicans	This study
IST B599	Vaginal exudate	Candida parapsilosis	This study
IST B601	Vaginal exudate	Candida albicans	This study	<4	<0,25
IST B602	Vaginal exudate	Candida glabrata	This study	<32	<1
IST B603	Urine	Candida albicans	This study	<4	<0,25
IST B604	Urine	Candida albicans	This study	<4	<0,25
IST B605	Hemoculture	Candida parapsilosis	This study
IST B606	Vaginal exudate	Candida albicans	This study	<4	<0,25
IST B607	Urine	Candida glabrata	This study	>64 (R)	4 (R)
IST B608	Urine	Candida albicans	This study	<4	<0,25
IST B609	Vaginal exudate	Candida albicans	This study	<4	<0,25
IST B610	Vaginal exudate	Candida albicans	This study	<4	<0,25
IST B611	Urine	Candida albicans	This study	<4	<0,25
IST B612	Vaginal exudate	Candida albicans	This study	<4	<0,25
IST B613	Vaginal exudate	Candida lusitaniae	This study
IST B614	Vaginal exudate	Candida albicans	This study	<4	<0,25
IST B615	Vaginal exudate	Candida glabrata	This study
IST B616	Urine	Candida albicans	This study
IST B617	Vaginal exudate	Candida albicans	This study
IST B620	Vaginal exudate	Candida albicans	This study
IST B621	Vaginal exudate	Candida albicans	This study	<4	<0,25
IST B622	Vaginal exudate	Candida albicans	This study	<4	<0,25
IST B623	Vaginal exudate	Candida albicans	This study
IST B624	Vaginal exudate	Candida albicans	This study	<4	<0,25
IST B625	Vaginal exudate	Candida albicans	This study	<4	<0,25
IST B626	Vaginal exudate	Candida albicans	This study	<4	<0,25
IST B627	Urine	Candida albicans	This study
IST B628	Vaginal exudate	Candida dubliniensis	This study
IST B629	Vaginal exudate	Candida albicans	This study	<4	<0,25
IST B630	Vaginal exudate	Candida albicans	This study	<4	<0,25
IST B631	Vaginal exudate	Candida albicans	This study	<4	<0,25
IST B632	Urine	Candida albicans	This study	<4	<0,25
IST B633	Vaginal exudate	Candida albicans	This study	<4	<0,25
IST B634	Vaginal exudate	Candida albicans	This study	<4	<0,25
IST B635	Vaginal exudate	Candida glabrata	This study	<32	<1
IST B636	Urine	Candida albicans	This study	<4	<0,25
IST B637	Vaginal exudate	Candida albicans	This study	<4	<0,25
IST B638	Vaginal exudate	Candida albicans	This study	<4	<0,25
IST B639	Vaginal exudate	Candida albicans	This study	<4	<0,25
IST B640	Vaginal exudate	Candida albicans	This study	<4	<0,25
IST B641	Vaginal exudate	Candida albicans	This study	<4	<0,25
IST B642	Vaginal exudate	Candida albicans	This study
IST B644	Vaginal exudate	Candida albicans	This study	<4	<0,25
IST B645	Vaginal exudate	Candida albicans	This study	<4	<0,25
IST B646	Vaginal exudate	Candida albicans	This study	<4	<0,25
IST B647	Vaginal exudate	Candida albicans	This study	<4	<0,25
IST B648	Vaginal exudate	Candida albicans	This study
IST B649	Vaginal exudate	Candida albicans	This study
IST B650	Urine	Candida lusitaniae	This study
IST B651	Vaginal exudate	Candida albicans	This study	<4	<0,25
IST B653	-	Candida tropicalis	This study
IST B654	Vaginal exudate	Candida albicans	This study
IST B655	Vaginal exudate	Candida parapsilosis	This study
IST B656	Vaginal exudate	Candida albicans	This study	<4	<0,25
IST B657	Urine	Candida albicans	This study
IST B658	Vaginal exudate	Candida albicans	This study	<4	<0,25
IST B659	Vaginal exudate	Candida albicans	This study	<4	<0,25
IST B660	Vaginal exudate	Candida glabrata	This study	<32	<1
IST B661	Vaginal exudate	Candida krusei	This study
IST B662	Hemoculture	Candida glabrata	This study	<32	<1
IST B663	Vaginal exudate	Candida albicans	This study	<4	<0,25
IST B664	Vaginal exudate	Candida albicans	This study	<4	<0,25
IST B665	Vaginal exudate	Candida glabrata	This study	<32	<1
IST B666	Vaginal exudate	Candida glabrata	This study	<32	<1
IST B667	Vaginal exudate	Candida albicans	This study
IST B669	Vaginal exudate	Candida albicans	This study	<4	<0,25
IST B670	Urine	Candida glabrata	This study	<32	<1
IST B671	Urine	Candida albicans	This study	<4	<0,25
IST B672	Vaginal exudate	Candida albicans	This study	<4	<0,25
IST B673	Vaginal exudate	Candida albicans	This study	<4	<0,25
IST B674	Vaginal exudate	Candida albicans	This study	<4	<0,25
IST B675	Vaginal exudate	Candida albicans	This study	<4	<0,25
IST B676	Sputum	Candida albicans	This study	<4	<0,25
IST B677	Vaginal exudate	Candida glabrata	This study	<32	<1
IST B678	Vaginal exudate	Candida albicans	This study
IST B679	Vaginal exudate	Candida albicans	This study	<4	<0,25
IST B680	Vaginal exudate	Candida albicans	This study
IST B681	-	Candida glabrata	This study	<32	<1
IST B682	-	Candida krusei	This study
IST B683	Feces	Candida albicans	This study
IST B684	Hemoculture	Candida glabrata	This study
IST B685	Biopsy	Candida glabrata	This study
IST B686	Vaginal exudate	Candida albicans	This study
IST B687	Vaginal exudate	Candida albicans	This study	<4	<0,25
IST B688	Vaginal exudate	Candida albicans	This study
IST B689	Vaginal exudate	Candida albicans	This study
IST B690	Ascitic Liquid	Candida albicans	This study
IST B691	Vaginal exudate	Candida albicans var africana	This study	<4	<0,25
IST B692	Catheter	Candida parapsilosis	This study
IST B693	Urine	Candida albicans	This study
IST B694	Urine	Candida albicans	This study	<4	<0,25
IST B695	Urine	Candida albicans	This study	<4	<0,25
IST B696	Urine	Candida albicans	This study	<4	<0,25
IST B697	Vaginal exudate	Candida albicans	This study
IST B698	Urine	Candida albicans	This study
IST B699	Catheter	Candida parapsilosis	This study
IST B700	Vaginal exudate	Candida albicans	This study
IST B701	Vaginal exudate	Candida albicans	This study	<4	<0,25
IST B702	Vaginal exudate	Candida albicans	This study
IST B703	Vaginal exudate	Candida albicans	This study	<4	<0,25
IST B704	Vaginal exudate	Candida albicans	This study
IST B705	Vaginal exudate	Candida albicans	This study	<4	<0,25
IST B706	Urine	Candida albicans	This study	<4	<0,25
IST B707	Vaginal exudate	Candida albicans	This study
IST B708	Vaginal exudate	Candida albicans	This study	<4	<0,25
IST B709	Bile	Candida albicans	This study	<4	<0,25
IST B710	Vaginal exudate	Candida glabrata	This study	<32	<1
IST B711	pus	Candida albicans	This study	<4	<0,25
IST B712	Vaginal exudate	Candida albicans	This study	<4	<0,25
IST B713	Urine	Candida albicans	This study	<4	<0,25
IST B714	Vaginal exudate	Candida glabrata	This study
IST B715	Vaginal exudate	Candida albicans	This study	<4	<0,25
IST B716	Urine	Candida albicans	This study	<4	<0,25
IST B717	Urine	Candida parapsilosis	This study
IST B719	Urine	Candida lusitaniae	This study
IST B720	Vaginal exudate	Candida albicans	This study	<4	<0,25
IST B721	Vaginal exudate	Candida glabrata	This study	<32	<1
IST B722	Vaginal exudate	Candida albicans	This study
IST B723	Vaginal exudate	Candida albicans	This study	<4	<0,25
IST B724	Urine	Candida glabrata	This study	<32	<1
IST B725	Urine	Candida tropicalis	This study
IST B726	Vaginal exudate	Candida albicans	This study	<4	<0,25
IST B727	Vaginal exudate	Candida albicans	This study
IST B728	Vaginal exudate	Candida albicans	This study	<4	<0,25
IST B729	Vaginal exudate	Candida albicans	This study	<4	<0,25
IST B730	Vaginal exudate	Candida albicans	This study
IST B731	Vaginal exudate	Candida albicans	This study	<4	<0,25
IST B732	Vaginal exudate	Candida albicans	This study
IST B733	Vaginal exudate	Candida albicans	This study
IST B734	Vaginal exudate	Candida albicans	This study
IST B735	Vaginal exudate	Candida albicans	This study
IST B736	Hemoculture	Candida glabrata	This study	<32	<1
IST B737	pus	Candida albicans	This study	<4	<0,25
IST B738	Vaginal exudate	Candida albicans	This study
IST B739	Vaginal exudate	Candida albicans	This study	<4	<0,25
IST B740	Vaginal exudate	Candida kefyr	This study
IST B741	Urine	Candida albicans	This study	<4	<0,25
IST B742	Urine	Candida albicans	This study	<4	<0,25
IST B743	Vaginal exudate	Candida albicans	This study
IST B744	Vaginal exudate	Candida albicans	This study	<4	<0,25
IST B745	Ascitic Liquid	Candida albicans	This study
IST B746	Urine	Candida glabrata	This study
IST B747	Vaginal exudate	Candida krusei + Candida albicans	This study
IST B748	Catheter	Candida parapsilosis	This study
IST B749	Vaginal exudate	Candida krusei	This study
IST B750	Vaginal exudate	Candida albicans	This study
IST B751	Vaginal exudate	Candida parapsilosis	This study
IST B752	Vaginal exudate	Candida albicans	This study
IST B753	-	Candida parapsilosis	This study
IST B754	pus	Candida glabrata	This study	<32	<1
IST B755	Urine	Candida tropicalis	This study
IST B756	Vaginal exudate	Candida albicans	This study
IST B757	Hemoculture	Candida glabrata	This study
IST B758	Vaginal exudate	Candida glabrata	This study
IST B759	pus	Candida albicans	This study
IST B761	Vaginal exudate	Candida albicans	This study	<4	<0,25
IST B762	Vaginal exudate	Candida albicans	This study
IST B763	Urine	Candida albicans	This study
IST B764	Vaginal exudate	Candida albicans	This study
IST B765	Vaginal exudate	Candida albicans	This study
IST B766	Urine	Candida albicans	This study
IST B767	Vaginal exudate	Candida albicans	This study	<4	<0,25
IST B768	pus	Candida albicans	This study
IST B770	Urine	Candida albicans	This study
IST B771	Vaginal exudate	Candida albicans	This study
IST B772	Vaginal exudate	Candida albicans	This study	<4	<0,25
IST B773	Vaginal exudate	Candida albicans	This study
IST B774	Urine	Candida albicans var africana	This study	<4	<0,25
IST B775	Vaginal exudate	Candida albicans	This study
IST B776	Vaginal exudate	Candida albicans	This study
IST B777	Vaginal exudate	Candida albicans	This study
IST B778	Vaginal exudate	Candida glabrata	This study
IST B779	Vaginal exudate	Candida glabrata	This study	<32	<1
IST B780	Vaginal exudate	Candida albicans	This study	<4	<0,25
IST B781	Vaginal exudate	Candida albicans	This study
IST B782	Urine	Candida albicans	This study	<4	<0,25
IST B783	Vaginal exudate	Candida glabrata	This study	<32	<1
IST B784	Vaginal exudate	Candida parapsilosis	This study
IST B785	Urine	Candida albicans	This study
IST B786	Vaginal exudate	Candida albicans	This study	<4	<0,25
IST B787	Bronchial Lavage	Candida glabrata	This study	<32	<1
IST B788	Urine	Candida glabrata	This study	<32	<1
IST B789	Urine	Candida albicans	This study	<4	<0,25
IST B790	Urine	Candida albicans	This study	<4	<0,25
IST B791	Urine	Candida albicans	This study	<4	<0,25
IST B792	Urine	Candida glabrata	This study	<32	<1
IST B793	Vaginal exudate	Candida albicans	This study	<4	<0,25
IST B794	Vaginal exudate	Candida albicans	This study	<4	<0,25
IST B795	pus	Candida albicans	This study
IST B796	Vaginal exudate	Candida albicans	This study
IST B797	Vaginal exudate	Candida albicans	This study	<4	<0,25
IST B798	Urine	Candida lusitaniae	This study
IST B799	Urine	Candida albicans	This study	<4	<0,25
IST B800	Vaginal exudate	Candida glabrata	This study	<32	<1
IST B801	Vaginal exudate	Candida albicans	This study	<4	<0,25
IST B802	Vaginal exudate	Candida albicans	This study	<4	<0,25
IST B803	Urine	Candida glabrata	This study	<32	<1
IST B804	Hemoculture	Candida glabrata	This study
IST B805	Urine	Candida glabrata	This study	<32	<1
IST B806	Vaginal exudate	Candida krusei	This study
IST B807	Vaginal exudate	Candida albicans	This study
IST B808	Vaginal exudate	Candida albicans	This study	<4	<0,25
IST B809	Urine	Candida albicans	This study	<4	<0,25
IST B810	Vaginal exudate	Candida albicans	This study	<4	<0,25
IST B811	Vaginal exudate	Candida albicans	This study	<4	<0,25
IST B812	Vaginal exudate	Candida albicans	This study	<4	<0,25
IST B813	Vaginal exudate	Candida albicans	This study
IST B814	Vaginal exudate	Candida albicans	This study
IST B815	Vaginal exudate	Candida albicans	This study
IST B816	Urine	Candida albicans	This study
IST B817	Vaginal exudate	Candida albicans	This study
IST B818	Vaginal exudate	Candida glabrata	This study	<32	<1
IST B819	Vaginal exudate	Candida albicans	This study
IST B820	Vaginal exudate	Candida albicans	This study
IST B821	Vaginal exudate	Candida albicans	This study
IST B822	Urine	Candida albicans	This study
IST B823	Urine	Candida albicans	This study
IST B824	Vaginal exudate	Candida albicans	This study
IST B825	Urine	Candida parapsilosis	This study
IST B826	Urine	Candida parapsilosis	This study
IST B827	Urine	Candida albicans	This study
IST B828	Vaginal exudate	Candida glabrata	This study
IST B829	Vaginal exudate	Candida glabrata	This study
IST B830	Vaginal exudate	Candida parapsilosis	This study
IST B831	Urine	Candida albicans	This study
IST B832	Vaginal exudate	Candida albicans	This study
IST B833	Urine	Candida kefyr	This study
IST B834	Vaginal exudate	Candida lusitaniae	This study
IST B836	Vaginal exudate	Candida albicans	This study
IST B837	Urine	Candida albicans	This study
IST B838	Urine	Candida glabrata	This study
IST B840	Vaginal exudate	Candida glabrata	This study
IST B841	Vaginal exudate	Candida albicans	This study
IST B843	Vaginal exudate	Candida albicans	This study
IST B844	Vaginal exudate	Candida albicans	This study
IST B845	Urine	Candida albicans	This study
IST B846	Vaginal exudate	Candida krusei	This study
IST B847	Urine	Candida albicans	This study
IST B848	Vaginal exudate	Candida albicans	This study
IST B849	Urine	Candida albicans	This study
IST B850	Hemoculture	Candida albicans	This study
IST B851	Skin appendages	Candida parapsilosis	This study
IST B852	Urine	Candida albicans	This study
IST B853	Vaginal exudate	Candida albicans	This study
IST B854	Urine	Candida albicans	This study
IST B855	Vaginal exudate	Candida albicans	This study
IST B856	Vaginal exudate	Candida glabrata	This study
IST B857	Vaginal exudate	Candida albicans	This study
IST B859	Urine	Candida albicans	This study
IST B860	Hemoculture	Candida albicans	This study
IST B861	Vaginal exudate	Candida albicans	This study
IST B862	Vaginal exudate	Candida albicans	This study
IST B863	Urine	Candida albicans	This study
IST B864	Urine	Candida albicans	This study
IST B866	Vaginal exudate	Candida albicans	This study
IST B867	Urine	Candida albicans	This study
IST B868	Vaginal exudate	Candida albicans	This study
IST B869	Vaginal exudate	Candida albicans	This study
IST B870	Vaginal exudate	Candida albicans	This study
IST B871	Vaginal exudate	Candida albicans	This study
IST B872	Vaginal exudate	Candida parapsilosis	This study
IST B873	Vaginal exudate	Candida albicans	This study
IST B874	Vaginal exudate	Candida albicans	This study
IST B875	Vaginal exudate	Candida albicans	This study
IST B876	Uretral exudate	Candida albicans	This study
IST B877	Vaginal exudate	Candida albicans	This study
IST B878	Vaginal exudate	Candida albicans	This study
IST B879	Urine	Candida albicans	This study
IST B880	Urine	Candida albicans	This study
IST B882	Vaginal exudate	Candida glabrata	This study
IST B883	-	Candida tropicalis	This study
IST B884	Vaginal exudate	Candida albicans	This study
IST B885	Vaginal exudate	Candida albicans	This study
IST B886	Vaginal exudate	Candida albicans	This study	<4	<0,25
IST B887	-	Candida albicans	This study
IST B888	-	Candida albicans	This study	<4	<0,25
IST B889	Vaginal exudate	Candida albicans	This study
IST B890	Vaginal exudate	Candida albicans	This study
IST B891	pus	Candida tropicalis	This study
IST B892	pus	Candida parapsilosis	This study
IST B893	Vaginal exudate	Candida albicans	This study
IST B894	Vaginal exudate	Candida albicans	This study
IST B896	Vaginal exudate	Candida glabrata	This study
IST B897	Vaginal exudate	Candida albicans	This study
IST B899	Vaginal exudate	Candida albicans	This study
IST B900	Vaginal exudate	Candida albicans	This study
IST B901	Vaginal exudate	Candida albicans	This study
IST B902	Vaginal exudate	Candida glabrata	This study	<32	<1
IST B903	Vaginal exudate	Candida albicans	This study	<4	<0,25
IST B904	Vaginal exudate	Candida albicans	This study
IST B905	Urine	Candida albicans	This study
IST B906	Vaginal exudate	Candida parapsilosis	This study
IST B907	Vaginal exudate	Candida albicans	This study
IST B908	Vaginal exudate	Candida albicans	This study
IST B909	Vaginal exudate	Candida albicans	This study
IST B910	Vaginal exudate	Candida parapsilosis	This study
IST B911	Uretral exudate	Candida glabrata	This study
IST B912	Urine	Candida parapsilosis	This study
IST B913	pus	Candida albicans	This study
IST B914	Vaginal exudate	Candida albicans	This study
IST B915	Vaginal exudate	Candida albicans	This study
IST B916	Vaginal exudate	Candida albicans	This study
IST B917	Vaginal exudate	Candida albicans	This study	<4	<0,25
IST B918	Sperm	Candida albicans	This study
IST B919	Vaginal exudate	Candida albicans	This study
IST B920	Catheter	Candida albicans	This study
IST B921	Vaginal exudate	Candida glabrata	This study
IST B922	Urine	Candida albicans	This study
IST B923	Vaginal exudate	Candida albicans	This study	<4	<0,25
IST B924	Uretral exudate	Candida albicans	This study
IST B925	Vaginal exudate	Candida krusei	This study
IST B926	Vaginal exudate	Candida glabrata	This study	<32	<1
IST B927	Vaginal exudate	Candida albicans	This study
IST B928	Vaginal exudate	Candida albicans	This study	<4	<0,25
IST B929	Vaginal exudate	Candida albicans	This study
IST B930	Vaginal exudate	Candida albicans	This study
IST B931	Vaginal exudate	Candida albicans	This study	<4	<0,25
IST B932	Vaginal exudate	Candida albicans	This study
IST B933	Vaginal exudate	Candida albicans	This study
IST B934	Vaginal exudate	Candida albicans	This study
IST B935	Vaginal exudate	Candida albicans	This study
IST B936	Vaginal exudate	Candida albicans	This study
IST B937	Urine	Candida parapsilosis	This study
IST B938	Vaginal exudate	Candida albicans	This study
IST B939	Urine	Candida albicans	This study
IST B940	Vaginal exudate	Candida glabrata	This study
IST B941	pus	Candida albicans	This study
IST B942	Vaginal exudate	Candida albicans	This study
IST B943	Vaginal exudate	Candida parapsilosis	This study
IST B944	Vaginal exudate	Candida albicans	This study
IST B946	Vaginal exudate	Candida albicans	This study
IST B947	Vaginal exudate	Candida glabrata	This study
IST B948	Vaginal exudate	Candida albicans	This study
IST B949	Vaginal exudate	Candida albicans	This study
IST B950	Vaginal exudate	Candida albicans	This study
IST B951	Vaginal exudate	Candida albicans	This study
IST B952	Vaginal exudate	Candida albicans	This study
IST B953	Urine	Candida albicans	This study
IST B954	Vaginal exudate	Candida albicans	This study
IST B955	Urine	Candida albicans	This study
IST B956	Vaginal exudate	Candida albicans	This study
IST B957	Urine	Candida lusitaniae	This study
IST B959	Vaginal exudate	Candida albicans	This study
IST B960	Vaginal exudate	Candida albicans	This study
IST B961	Hemoculture	Candida albicans	This study
IST B962	Urine	Candida albicans	This study
IST B963	Vaginal exudate	Candida albicans	This study
IST B964	Vaginal exudate	Candida albicans	This study
IST B965	Vaginal exudate	Candida albicans	This study
IST B966	Urine	Candida albicans	This study
IST B967	Urine	Candida albicans	This study
IST B968	Urine	Candida albicans	This study
IST B969	Urine	Candida albicans	This study
IST B970	Urine	Candida albicans	This study
IST B971	Urine	Candida albicans	This study
IST B972	Urine	Candida albicans	This study
IST B973	Vaginal exudate	Candida albicans	This study
IST B974	Vaginal exudate	Candida glabrata	This study
IST B975	Vaginal exudate	Candida albicans	This study
IST B976	Vaginal exudate	Candida albicans	This study
IST B977	Urine	Candida albicans	This study
IST B978	Vaginal exudate	Candida albicans	This study
IST B979	Vaginal exudate	Candida albicans	This study
IST B980	Vaginal exudate	Candida albicans	This study
IST B981	Vaginal exudate	Candida albicans	This study
IST B982	Vaginal exudate	Candida albicans	This study
IST B983	Vaginal exudate	Candida krusei	This study
IST B984	Vaginal exudate	Candida albicans	This study
IST B985	Urine	Candida albicans	This study
IST B986	Vaginal exudate	Candida albicans	This study
IST B987	Vaginal exudate	Candida albicans	This study
IST B988	Bile	Candida albicans	This study
IST B989	Urine	Candida parapsilosis	This study
IST B990	pus	Candida albicans	This study
IST B991	Urine	Candida albicans	This study
IST B992	Vaginal exudate	Candida albicans	This study
IST B993	-	Candida albicans	This study
IST B994	Vaginal exudate	Candida albicans	This study
IST B995	Vaginal exudate	Candida albicans	This study
IST B996	Hemoculture	Candida albicans	This study
IST B997	Vaginal exudate	Candida krusei	This study
IST B998	Vaginal exudate	Candida albicans	This study
IST B999	Vaginal exudate	Candida albicans	This study
IST B1001	Feces	Candida albicans	This study
IST B1002	Vaginal exudate	Candida albicans	This study
IST B1003	-	Candida glabrata	This study
IST B1004	Vaginal exudate	Candida albicans	This study
IST B1005	Urine	Candida albicans	This study
IST B1006	Urine	Candida albicans	This study
IST B1007	Vaginal exudate	Candida glabrata	This study
IST B1009	Feces	Candida inconspicua	This study
IST B1010	Vaginal exudate	Candida albicans	This study
IST B1011	Feces	Candida albicans	This study
IST B1012	pus	Candida albicans	This study
IST B1013	Vaginal exudate	Candida krusei	This study
IST B1014	Ascitic Liquid	Candida albicans	This study
IST B1017	Vaginal exudate	Candida albicans	This study
IST B1018	Vaginal exudate	Candida glabrata	This study
IST B1019	Vaginal exudate	Candida albicans	This study
IST B1020	Feces	Candida albicans	This study
IST B1021	Vaginal exudate	Candida albicans	This study
IST B1022	pus	Candida albicans	This study
IST B1023	Urine	Candida tropicalis	This study
IST B1024	Urine	Candida tropicalis	This study
IST B1025	pus	Candida albicans	This study
IST B1026	Vaginal exudate	Candida albicans	This study
IST B1027	Vaginal exudate	Candida krusei	This study
IST B1028	Vaginal exudate	Candida albicans	This study
IST B1029	Vaginal exudate	Candida albicans	This study
IST B1030	Urine	Candida parapsilosis	This study
IST B1031	Vaginal exudate	Candida krusei	This study
IST B1032	Urine	Candida albicans	This study
IST B1033	Urine	Candida albicans	This study
IST B1035	Vaginal exudate	Candida albicans	This study
IST B1036	Vaginal exudate	Candida albicans	This study
IST B1037	Vaginal exudate	Candida albicans	This study
IST B1038	Vaginal exudate	Candida albicans	This study
IST B1039	Urine	Candida albicans	This study
IST B1040	Vaginal exudate	Candida albicans	This study
IST B1041	Vaginal exudate	Candida albicans	This study
IST B1042	Vaginal exudate	Candida krusei	This study
IST B1043	Urine	Candida albicans	This study
IST B1044	Urine	Candida albicans	This study
IST B1045	Vaginal exudate	Candida parapsilosis	This study
IST B1046	Vaginal exudate	Candida glabrata	This study	<32	<1
IST B1047	Vaginal exudate	Candida albicans	This study
IST B1048	Uretral exudate	Candida albicans	This study
IST B1049	Uretral exudate	Candida albicans	This study
IST B1050	Urine	Candida tropicalis	This study
IST B1051	Vaginal exudate	Candida albicans	This study
IST B1052	Vaginal exudate	Candida albicans	This study
IST B1053	Urine	Candida albicans	This study
IST B1054	Vaginal exudate	Candida glabrata	This study
IST B1055	Urine	Candida albicans	This study
IST B1056	Vaginal exudate	Candida krusei	This study
IST B1057	Vaginal exudate	Candida albicans	This study
IST B1058	Vaginal exudate	Candida albicans	This study
IST B1059	Vaginal exudate	Candida albicans	This study	<4	<0,25
IST B1060	Vaginal exudate	Candida albicans	This study
IST B1061	Vaginal exudate	Candida albicans	This study
IST B1062	Vaginal exudate	Candida albicans	This study
IST B1063	Urine	Candida albicans	This study
IST B1064	pus	Candida Albicans	This study
IST B1065	Vaginal exudate	Candida albicans	This study
IST B1066	Vaginal exudate	Candida glabrata	This study
IST B1067	Urine	Candida albicans	This study
IST B1068	Vaginal exudate	Candida tropicalis	This study
IST B1069	Vaginal exudate	Candida glabrata	This study
IST B1070	Vaginal exudate	Candida albicans	This study
IST B1071	Urine	Candida albicans	This study
IST B1072	Vaginal exudate	Candida albicans	This study
IST B1073	Vaginal exudate	Candida albicans	This study
IST B1074	Urine	Candida albicans	This study
IST B1075	Vaginal exudate	Candida albicans	This study
IST B1076	Vaginal exudate	Candida glabrata	This study
IST B1077	Uretral exudate	Candida albicans	This study
IST B1078	Vaginal exudate	Candida albicans	This study
IST B1079	Vaginal exudate	Candida albicans	This study
IST B1080	Vaginal exudate	Candida albicans	This study
IST B1081	Urine	Candida albicans	This study
IST B1082	Vaginal exudate	Candida lusitaniae	This study
IST B1083	Urine	Candida albicans	This study	<4	<0,25
IST B1084	Vaginal exudate	Candida albicans	This study
IST B1085	Vaginal exudate	Candida glabrata	This study
IST B1086	Vaginal exudate	Candida albicans	This study
IST B1087	Urine	Candida albicans	This study	<4	<0,25
IST B1088	Urine	Candida albicans	This study
IST B1089	Urine	Candida Albicans	This study
IST B1090	Vaginal exudate	Candida albicans	This study
IST B1091	Vaginal exudate	Candida albicans	This study
IST B1092	Vaginal exudate	Candida albicans	This study
IST B1093	Vaginal exudate	Candida albicans	This study	<4	<0,25
IST B1094	Vaginal exudate	Candida albicans	This study
IST B1095	Vaginal exudate	Candida glabrata	This study	<32	<1
IST B1096	Vaginal exudate	Candida albicans	This study
IST B1097	Vaginal exudate	Candida albicans	This study
IST B1098	Vaginal exudate	Candida albicans	This study	<4	<0,25
IST B1099	Vaginal exudate	Candida glabrata	This study	<32	<1
IST B1100	Vaginal exudate	Candida glabrata	This study
IST B1101	Vaginal exudate	Candida albicans	This study
IST B1102	Urine	Candida albicans	This study
IST B1103	Urine	Candida Albicans	This study
IST B1104	Urine	Candida albicans	This study
IST B1105	Vaginal exudate	Candida albicans	This study
IST B1107	Vaginal exudate	Candida albicans	This study
IST B1108	Vaginal exudate	Candida krusei	This study
IST B1109	Vaginal exudate	Candida tropicalis	This study
IST B1110	Vaginal exudate	Candida albicans	This study
IST B1111	Vaginal exudate	Candida parapsilosis	This study
IST B1112	Vaginal exudate	Candida albicans	This study
IST B1113	Vaginal exudate	Candida glabrata	This study
IST B1114	Skin appendages	Candida parapsilosis	This study
IST B1115	Vaginal exudate	Candida albicans	This study
IST B1116	Vaginal exudate	Candida parapsilosis	This study
IST B1117	Uretral exudate	Candida tropicalis	This study
IST B1118	Uretral exudate	Candida krusei	This study
IST B1119	Vaginal exudate	Candida krusei	This study
IST B1120	Vaginal exudate	Candida albicans	This study
IST B1121	Vaginal exudate	Candida glabrata	This study
IST B1122	Urine	Candida tropicalis	This study
IST B1123	Vaginal exudate	Candida albicans	This study
IST B1124	Urine	Candida tropicalis	This study
IST B1125	Vaginal exudate	Candida albicans	This study
IST B1126	Vaginal exudate	Candida albicans	This study
IST B1128	Urine	Candida albicans	This study
IST B1129	Urine	Candida albicans	This study
IST B1130	Vaginal exudate	Candida albicans	This study
IST B1131	Urine	Candida glabrata	This study
IST B1132	Vaginal exudate	Candida albicans	This study
IST B1133	Vaginal exudate	Candida albicans	This study
IST B1134	Vaginal exudate	Candida albicans	This study
IST B1135	Vaginal exudate	Candida albicans	This study
IST B1136	Feces	Candida glabrata	This study
IST B1137	Vaginal exudate	Candida albicans	This study
IST B1138	pus	Candida albicans	This study
IST B1139	Vaginal exudate	Candida albicans	This study
IST B1140	Urine	Candida albicans	This study
IST B1141	Vaginal exudate	Candida albicans	This study
IST B1142	Vaginal exudate	Candida albicans	This study
IST B1143	Vaginal exudate	Candida albicans	This study
IST B1144	Vaginal exudate	Candida albicans	This study
IST B1145	Vaginal exudate	Candida glabrata	This study
IST B1146	Vaginal exudate	Candida albicans	This study
IST B1147	Vaginal exudate	Candida guilliermondii	This study
IST B1148	Vaginal exudate	Candida albicans	This study
IST B1149	Urine	Candida albicans	This study
IST B1150	Vaginal exudate	Candida albicans	This study
IST B1151	Vaginal exudate	Candida albicans	This study
IST B1152	Urine	Candida albicans	This study	<4	<0,25
IST B1153	Urine	Candida albicans	This study
IST B1154	Vaginal exudate	Candida albicans	This study	<4	<0,25
IST B1155	Vaginal exudate	Candida albicans	This study
IST B1156	Vaginal exudate	Candida krusei	This study
IST B1157	Vaginal exudate	Candida albicans	This study
IST B1158	Vaginal exudate	Candida albicans	This study
IST B1159	Urine	Candida albicans	This study
IST B1160	Vaginal exudate	Candida parapsilosis	This study
IST B1161	Vaginal exudate	Candida albicans	This study
IST B1162	Vaginal exudate	Candida albicans	This study
IST B1163	Vaginal exudate	Candida albicans	This study
IST B1164	Urine	Candida lusitaniae	This study
IST B1165	Vaginal exudate	Candida albicans	This study
IST B1166	Urine	Candida albicans	This study
IST B1168	Vaginal exudate	Candida glabrata	This study
IST B1169	Vaginal exudate	Candida albicans	This study
IST B1170	Vaginal exudate	Candida albicans	This study	<4	<0,25
IST B1171	Uretral exudate	Candida albicans	This study	<4	<0,25
IST B1172	Vaginal exudate	Candida glabrata	This study	<32	<1
IST B1173	Vaginal exudate	Candida glabrata	This study	<32	<1
IST B1174	Vaginal exudate	Candida albicans	This study
IST B1175	Vaginal exudate	Candida Albicans	This study
IST B1176	Vaginal exudate	Candida albicans	This study
IST B1177	Vaginal exudate	Candida albicans	This study
IST B1178	Vaginal exudate	Candida glabrata	This study	<32	<1
IST B1179	Vaginal exudate	Candida albicans	This study
IST B1180	Urine	Candida tropicalis	This study
IST B1181	Vaginal exudate	Candida albicans	This study	<4	<0,25
IST B1182	Vaginal exudate	Candida albicans	This study	<4	<0,25
IST B1183	Vaginal exudate	Candida albicans	This study
IST B1184	Vaginal exudate	Candida albicans	This study
IST B1185	Urine	Candida albicans	This study	<4	<0,25
IST B1186	Vaginal exudate	Candida albicans	This study
IST B1187	Urine	Candida parapsilosis	This study
IST B1188	Vaginal exudate	Candida albicans	This study	<4	<0,25
IST B1189	Vaginal exudate	Candida albicans	This study	<4	<0,25
IST B1190	Vaginal exudate	Candida albicans	This study
IST B1191	Vaginal exudate	Candida albicans	This study
IST B1192	Vaginal exudate	Candida albicans	This study	<4	<0,25
IST B1193	Vaginal exudate	Candida albicans	This study
IST B1194	Vaginal exudate	Candida albicans	This study	<4	<0,25
IST B1195	Vaginal exudate	Candida albicans	This study	<4	<0,25
IST B1196	Vaginal exudate	Candida albicans	This study
IST B1197	Vaginal exudate	Candida albicans	This study	<4	<0,25
IST B1198	Urine	Candida tropicalis	This study
IST B1199	Urine	Candida albicans	This study
IST B1200	Vaginal exudate	Candida albicans	This study	<4	<0,25
IST B1201	Urine	Candida albicans	This study
IST B1202	Vaginal exudate	Candida albicans	This study
IST B1203	Vaginal exudate	Candida albicans	This study
IST B1204	Urine	Candida tropicalis	This study
IST B1205	Vaginal exudate	Candida albicans	This study
IST B1206	Hemoculture	Candida kefyr	This study
IST B1207	Vaginal exudate	Candida albicans	This study
IST B1208	Vaginal exudate	Candida glabrata	This study
IST B1209	Urine	Candida albicans	This study
IST B1210	Vaginal exudate	Candida glabrata	This study
IST B1211	Vaginal exudate	Candida albicans	This study
IST B1212	Vaginal exudate	Candida albicans	This study
IST B1213	Vaginal exudate	Candida albicans	This study
IST B1214	Urine	Candida parapsilosis	This study
IST B1215	Vaginal exudate	Candida albicans	This study
IST B1216	Vaginal exudate	Candida albicans	This study
IST B1217	Urine	Candida albicans	This study
IST B1218	Vaginal exudate	Candida parapsilosis	This study
IST B1219	Vaginal exudate	Candida albicans	This study
IST B1220	Vaginal exudate	Candida albicans	This study
IST B1221	Vaginal exudate	Candida albicans	This study
IST B1222	Vaginal exudate	Candida glabrata	This study
IST B1223	Urine	Candida tropicalis	This study
IST B1224	Vaginal exudate	Candida albicans	This study
IST B1225	Urine	Candida albicans	This study
IST B1226	Vaginal exudate	Candida albicans	This study
IST B1227	Bronchial Lavage	Candida glabrata	This study
IST B1228	Vaginal exudate	Candida glabrata	This study
IST B1229	Urine	Candida glabrata	This study
IST B1230	Urine	Candida albicans	This study
IST B1231	Vaginal exudate	Candida albicans	This study
IST B1232	Vaginal exudate	Candida albicans	This study	<4	<0,25
IST B1233	Vaginal exudate	Candida albicans	This study
IST B1235	Vaginal exudate	Candida sake	This study
IST B1236	Urine	Candida albicans	This study
IST B1238	Vaginal exudate	Candida albicans	This study
IST B1239	Urine	Candida albicans	This study
IST B1240	Ascitic Liquid	Candida albicans	This study
IST B1241	-	Candida albicans	This study
IST B1242	Hemoculture	Candida parapsilosis	This study
IST B1243	Vaginal exudate	Candida albicans	This study
IST B1244	Vaginal exudate	Candida glabrata	This study
IST B1245	Vaginal exudate	Candida albicans	This study
IST B1246	Urine	Candida albicans	This study
IST B1247	Urine	Candida albicans	This study
IST B1248	Vaginal exudate	Candida albicans	This study
IST B1249	Vaginal exudate	Candida albicans	This study
IST B1250	Urine	Candida albicans	This study
IST B1251	Vaginal exudate	Candida albicans	This study
IST B1252	Vaginal exudate	Candida albicans	This study
IST B1253	Ascitic Liquid	Candida glabrata	This study
IST B1255	Vaginal exudate	Candida albicans	This study
IST B1256	Vaginal exudate	Candida albicans	This study
IST B1257	Vaginal exudate	Candida glabrata	This study
IST B1258	Uretral exudate	Candida krusei	This study
IST B1259	Vaginal exudate	Candida krusei	This study
IST B1260	Vaginal exudate	Candida albicans	This study
IST B1261	Hemoculture	Candida kefyr	This study
IST B1262	Vaginal exudate	Candida krusei	This study
IST B1263	Vaginal exudate	Candida albicans	This study
IST B1264	Urine	Candida albicans	This study
IST B1265	Vaginal exudate	Candida albicans	This study
IST B1266	Urine	Candida albicans	This study
IST B1267	Bronchial Lavage	Candida krusei	This study
IST B1268	Bronchial Lavage	Candida krusei	This study
IST B1271	Urine	Candida tropicalis	This study
IST B1272	Hemoculture	Candida albicans	This study
IST B1273	Vaginal exudate	Candida krusei	This study
IST B1274	Vaginal exudate	Candida albicans	This study
IST B1273	Vaginal exudate	Candida krusei	This study
IST B1274	Vaginal exudate	Candida albicans	This study

## Sheet: Table S2
Table S2. List of the plasmids and primers used in this study. In the case of the plasmids it is also provided their origin while in the case of the primers it is indicated for which their application was used for.
Plasmid	Plasmid Description	Reference
pSP76	Plasmid that drives expression of CgPDR1 from its natural promoter and terminator	Khakhina, S, et al, 2018
pSP76_PDR1K274Q	Plasmid that drives expression of the K274Q CgPdr1 mutant from its natural promoter and terminator	This study
pSP76_PDR1I392M	Plasmid that drives expression of the I392M CgPdr1 mutant from its natural promoter and terminator	This study
pSP76_PDR1I803T	Plasmid that drives expression of the I803T CgPdr1 mutant from its natural promoter and terminator	This study
pA12	Plasmid that drives expression of CgPDR1 from its natural promoter and terminator	This study
pA12_PDR1K274Q	Plasmid that drives expression of the K274Q CgPdr1 mutant from its natural promoter and terminator	This study
pSP76_PDR1I392M	Plasmid that drives expression of the I392M CgPdr1 mutant from its natural promoter and terminator	This study
pSP76_PDR1I803T	Plasmid that drives expression of the I803T CgPdr1 mutant from its natural promoter and terminator	This study
Primer ID	Sequence (5’- 3’)	Used for
CgPDR1_FW1	CTT CCA TTA CTT CGT ACC C	CgPDR1 amplification and sequencing;
CgPDR1_FW2	GCC TAG TAC AAG AAG AAC AAA AGT TG	CgPDR1 sequencing
CgPDR1_FW3	TCC ATT GAC GCC ATT GAG TTA CAA C	CgPDR1 sequencing
CgPDR1_FW4	TTA CGA CCG CAA TTT GGA CTC AGA GG	CgPDR1 sequencing
CgPDR1_REV4	CAC ACT AAG ATC CAT TGG CTT TTG AAT	CgPDR1 sequencing
CgPDR1_REV3	CAG AGT GCC AAA GTA TGC AGC CTT	CgPDR1 sequencing
CgPDR1_REV2	CGG CGA GGG TAA ATT CAA CTG ATA C	CgPDR1 sequencing
CgPDR1_REV1	GAC AGT GTG CAT AGC CTG	CgPDR1 amplification and sequencing
K274Q_FW	AAG ATT AAT GAA AGT GCC ACC ACT CAG TCA CTT GAA ACA AAC TTG	Site directed mutagenesis
K274Q_RV	CAA GTT TGT TTC AAG TGA CTG AGT GGT GGC ACT TTC ATT AAT CTT	Site directed mutagenesis
I392M_FW	GATATCGATGGCCAACCCGTTAG	Site directed mutagenesis
I392M_RV	GACTCTTCATTGATATGGTGAACAC	Site directed mutagenesis
I803T_FW	ATGAATGAAACTATCCTAAGTATGG	Site directed mutagenesis
I803T_RV	TACTTTCCAGTGCTCATATAGTC	Site directed mutagenesis
CgPDR1_FW_RT	GCT TGC CCG CAC ATT GA	qPCR
CgPDR1_REV_RT	CCT CAG GCA GAG TGT GTT CTT TC	qPCR
CgPUP1_FW_RT	CAC TGG TGC GCT GAA AGG TG	qPCR
CgPUP1_REV_RT	TGT CCC AGG CTA TCT TTG CC	qPCR
CgRDN25_FW_RT	AAC AAC TCA CCG GCC GAA T	qPCR
CgRDN25_REV_RT	CAA GCG TGT TAC CTA TAC TCC GCC GTC A	qPCR

## Sheet: Table S3
Table S3. Modifications found in the sequences of CgPdr1 transcription factor (at the nucleotide and amino acid level) encoded by the azole-resistant C.glabrata isolates identified in this study or in the study of Salazar et al., (2018). As a point of comparison the CgPdr1 sequence of the susceptible reference strain CBS138 were used. Nucleotide modifications leading to non-synonymous SNPs are ma…
	CgPDR1 coding sequence coordinates
Strain	162	226	271	293	427	705	727	765	820	837	871	1126	1176	1663G	1672	1749	2319	2408	2587	2994	3156
CBS138	-	-	-	-	-	-	-	-	-	-	-	-	-	-		-	-	-	-	-	-
FFUL443	T	C	A	C	C	T		T		T	C		G			T	T		C	C	A
FFUL674			A	C			A											C
FFUL830			A	C			A		C					G
FFUL887			A	C			A		C
ISTA56			A	C			A								T
ISTB556			A	C			A					T
ISTB218			A	C			A
	CgPdr1 amino acid sequence coordinates
Strain	76	91	98	143	173	243	274	376	392	555	558	803
CBS138	S	V	L	T	D	D	K	R	I	E	G	I
FFUL443	P	I	S	P					M
FFUL674		I	S			N						T
FFUL866		I	S			N				K
ISTA56		I	S			N					C
ISTB556		I	S			N		W
ISTB607		I	S			N		W
ISTB218		I	S			N

## Sheet: Table S4
Table S4. Comparative transcriptomic profiling of C. glabrata FFUL443 isolate, in comparison with the reference strain CBS138. Cells of both strains were cultivated as detailed in materials and methods. Documented targets of CgPdr1 are highlighted in grey (for this it was selected among the activated genes those in which documented positive influence of CgPdr1 has been described, while in the dow…
ORF name	Gene name	Log2 FC (mRNA FFUL443/mRNA CBS138)	Std dev	mRNA FFUL443/mRNA CBS138	Function	Nr PDRE motifs
CAGL0A01826g	HXT5	6.15185	0.256276	71.1034	Ortholog(s) have glucose transmembrane transporter activity, role in glucose transmembrane transport and plasma membrane localization
CAGL0I05610g		5.1008	0.182201	34.3158	Ortholog of S. cerevisiae : YNR014W	1
CAGL0E04554g		4.72017	0.153654	26.358	Putative protein; gene is upregulated in azole-resistant strain
CAGL0J11550g		4.63185	0.171714	24.7928	Ortholog of S. cerevisiae YNL195C
CAGL0C03740g		4.61121	0.415704	24.4407	Protein of unknown function
CAGL0M06963g		4.44271	0.723114	21.7465	Ortholog(s) have role in tRNA export from nucleus and cytosol localization
CAGL0J04202g	HSP12	4.35567	0.38563	20.4733	Heat shock protein; gene is upregulated in azole-resistant strain; expression upregulated in biofilm vs planktonic cell culture	2
CAGL0H07469g		4.26123	0.355163	19.1761	Putative adhesin-like protein
CAGL0H02101g		4.00205	0.230118	16.0228	Ortholog(s) have role in RNA metabolic process and fungal biofilm matrix localization	1
CAGL0B01012g		3.93474	0.463625	15.2924	Ortholog(s) have L-proline transmembrane transporter activity, amino acid transmembrane transporter activity, role in amino acid transport, transmembrane transport and plasma membrane localization
CAGL0K05687g		3.81972	0.547373	14.1205	Has domain(s) with predicted FMN binding, catalytic activity, oxidoreductase activity and role in oxidation-reduction process
CAGL0G05269g		3.53513	0.0337011	11.5926	Putative mitochondrial protein; gene is downregulated in azole-resistant strain
CAGL0G01738g		3.44377	0.300206	10.8812	Protein of unknown function
CAGL0F07777g		3.29487	0.0612301	9.81417	Putative aldehyde dehydrogenase; expression upregulated in biofilm vs planktonic cell culture
CAGL0J03080g		3.12448	0.240512	8.72091	Ortholog(s) have role in energy reserve metabolic process and cell periphery localization
CAGL0M11000g		3.06061	0.167686	8.34323	Ortholog(s) have cytosol localization
CAGL0J04004g		2.95539	0.017612	7.75639	Ortholog(s) have role in lipid homeostasis, mitochondrion organization and integral component of mitochondrial membrane, mitochondrial outer membrane localization
CAGL0M12551g		2.92944	0.166545	7.61816	Ortholog(s) have role in energy reserve metabolic process
CAGL0F08085g		2.81327	0.14644	7.02878	Ortholog(s) have pyruvate transmembrane transporter activity, role in mitochondrial pyruvate transmembrane transport and mitochondrial membrane, plasma membrane localization
CAGL0L13354g	TNR1	2.81023	0.76873	7.01394	Putative nicotinamide transporter; strongly induced under niacin-limiting conditions
CAGL0D02640g		2.79004	0.193876	6.91651	Has domain(s) with predicted transmembrane transporter activity, role in transmembrane transport and integral component of membrane, membrane localization
CAGL0L04378g		2.78283	0.180717	6.882	Unknown
CAGL0J00451g		2.73787	0.0557325	6.67083	Putative glyceraldehyde-3-phosphate dehydrogenase; protein differentially expressed in azole resistant strain; expression downregulated in biofilm vs planktonic cell culture
CAGL0D03894g	PRO1	2.72574	0.0692439	6.61499	Putative gamma-glutamyl phosphate reductase
CAGL0F00869g		2.72542	0.0387154	6.61354	Ortholog(s) have role in ascospore wall assembly and ascospore wall, prospore membrane localization	1
CAGL0I07865g		2.65976	0.376859	6.31927	Ortholog(s) have role in pathogenesis and plasma membrane localization	1
CAGL0M14113g	TNR2	2.59572	0.622015	6.04491	High-affinity transporter of NAD+ precursors; strongly induced under niacin-limiting conditions 2010-10-21
CAGL0I06050g	INO1	2.59042	0.49041	6.02274	Putative inositol 1-phosphate synthase; regulated by the transcriptional activators Ino2p and Ino4p; protein differentially expressed in azole resistant strain
CAGL0G03289g	SSA3	2.58637	0.280721	6.00586	Heat shock protein of the HSP70 family
CAGL0H00418g		2.58525	0.407602	6.00119	Protein of unknown function
CAGL0F08261g		2.58366	0.240608	5.99458	Ortholog(s) have high molecular weight kininogen binding, phosphopyruvate hydratase activity, protein-glutamine gamma-glutamyltransferase activity
CAGL0C02365g		2.55149	0.232678	5.8624	Protein of unknown function	1
CAGL0E05632g		2.53439	0.167716	5.79332	Ortholog(s) have L-proline transmembrane transporter activity, neutral amino acid transmembrane transporter activity and role in gamma-aminobutyric acid transport, neutral amino acid transport, proline transport
CAGL0F04631g		2.5232	0.515977	5.74857	Unknown
CAGL0E05984g		2.51487	0.0430449	5.71546	Ortholog of S. cerevisiae GRE1
CAGL0K05247g		2.50849	0.386222	5.69026	Ortholog(s) have ubiquitin protein ligase binding activity, role in fungal-type cell wall organization, regulation of transcription by RNA polymerase II and nucleus localization
CAGL0G02937g		2.4974	0.00516805	5.64668	Ortholog(s) have pyruvate decarboxylase activity and role in L-phenylalanine catabolic process, aromatic amino acid family catabolic process to alcohol via Ehrlich pathway, ethanol metabolic process, tryptophan catabolic process
CAGL0M01760g	CDR1	2.47932	0.196752	5.57633	Multidrug transporter of ATP-binding cassette (ABC) superfamily, involved in resistance to azoles; expression regulated by Pdr1p; increased abundance in azole resistant strains; expression increased by loss of the mitochondrial genome	5
CAGL0F08261g		2.45905	0.662395	5.49853	Ortholog(s) have high molecular weight kininogen binding, phosphopyruvate hydratase activity, protein-glutamine gamma-glutamyltransferase activity
CAGL0K09372g		2.40552	0.105654	5.29827	Ortholog(s) have DNA-binding transcription repressor activity, RNA polymerase II-specific, RNA polymerase II proximal promoter sequence-specific DNA binding activity
CAGL0F04719g		2.26694	0.0581964	4.81301	Ortholog(s) have glycogen (starch) synthase activity, role in glycogen biosynthetic process and cytoplasm localization
CAGL0A04829g		2.24559	0.112414	4.74232	Putative hexokinase isoenzyme 2; protein differentially expressed in azole resistant strain
CAGL0F00605g	GLK1	2.23466	0.290932	4.70652	Aldohexose specific glucokinase
CAGL0E01815g	YPS8	2.23165	0.343071	4.69671	Putative aspartic protease; predicted GPI-anchor; member of a YPS gene cluster that is required for virulence in mice; induced in response to low pH and high temperature
CAGL0B01595g		2.1631	0.479855	4.47877	Protein of unknown function
CAGL0K07337g		2.14851	0.225084	4.43369	Has domain(s) with predicted ion channel activity, role in ion transport and membrane localization
CAGL0A01089g		2.14814	0.254241	4.43255	Has domain(s) with predicted alcohol O-acetyltransferase activity and role in alcohol metabolic process
CAGL0A02002g		2.14091	0.258098	4.41041	Ortholog of S. cerevisiae YOL024W
CAGL0E00341g	MTL1a	2.13107	0.497761	4.38043	Mating type protein a1; differentially spliced transcript; expressed in both MATa and MATalpha strains
CAGL0B02563g	GIN3	2.12125	0.201126	4.35071	Expressed protein of unknown function
CAGL0G02739g		2.11155	0.319671	4.32156	Ortholog(s) have DNA-binding transcription factor activity, DNA-binding transcription factor activity, RNA polymerase II-specific activity
CAGL0D00946g		2.0888	0.474502	4.25393	Putative phosphatidylinositol transfer protein; gene is upregulated in azole-resistant strain	1
CAGL0J05830g		2.0837	0.00106783	4.23892	Ortholog of S. cerevisiae YNL144C
CAGL0D00198g		2.06217	0.0995207	4.17613	Ortholog(s) have (R,R)-butanediol dehydrogenase activity and role in alcohol metabolic process, butanediol biosynthetic process
CAGL0L13288g		2.05603	0.00339771	4.15841	Protein of unknown function
CAGL0F08745g		2.05258	0.147165	4.14847	Ortholog(s) have role in cellular response to desiccation and cytoplasm localization
CAGL0L05258g		2.04337	0.0600033	4.12206	Ortholog(s) have sulfiredoxin activity and role in cellular protein localization, cellular response to oxidative stress	1
CAGL0G02717g		2.0215	0.218354	4.06006	Ortholog(s) have glucan 1,4-alpha-glucosidase activity, role in glycogen catabolic process and fungal-type vacuole localization	2
CAGL0M02915g		2.01513	0.0977109	4.04218	Ortholog(s) have role in autophagy of peroxisome and peroxisome localization
CAGL0G05544g		2.01077	0.3563	4.02998	Ortholog(s) have role in cell morphogenesis involved in conjugation with cellular fusion and cell surface, fungal-type cell wall, mating projection localization
CAGL0L05434g	SUN4	2.00758	0.690591	4.02108	Ortholog(s) have role in fungal-type cell wall organization or biogenesis, mitochondrion organization and fungal-type cell wall localization
CAGL0D02134g		1.99154	0.0997177	3.9766	Ortholog of S. cerevisiae YKL133C	1
CAGL0M03377g		1.98577	0.0383564	3.96075	Ortholog(s) have 1,4-alpha-glucan branching enzyme activity and role in glycogen biosynthetic process
CAGL0G02849g		1.96251	0.164843	3.89738	Ortholog(s) have endoplasmic reticulum, nuclear envelope localization
CAGL0H09592g		1.94376	0.313493	3.84706	Putative GPI-linked cell wall protein
CAGL0H02387g		1.93939	0.000374685	3.83544	Putative trehalose-6-phosphate synthase/phosphatase subunit; gene is upregulated in azole-resistant strain	2
CAGL0M05401g		1.93442	0.332605	3.82224	Ortholog of S. cerevisiae YBR201C-A
CAGL0D02728g		1.92364	0.0222141	3.79378	Has domain(s) with predicted intramolecular lyase activity
CAGL0M14069g	PWP6	1.91914	0.41403	3.78197	Adhesin-like protein with similarity to S. cerevisiae flocculins, cell wall proteins that mediate adhesion; predicted GPI anchor; belongs to adhesin cluster II	1
CAGL0H09614g		1.91482	0.214324	3.77066	Putative GPI-linked cell wall protein
CAGL0F06677g	GPA1	1.89976	0.192995	3.73151	Ortholog(s) have G-protein beta-subunit binding, GTPase activity, guanyl nucleotide binding activity
CAGL0G04433g		1.89461	0.320753	3.71822	Unknown
CAGL0F01419g	AUS1	1.86873	0.282274	3.65211	ATP-binding cassette transporter involved in sterol uptake
CAGL0B03311g		1.86714	0.0612827	3.6481	Ortholog(s) have ubiquitin-protein transferase activity, role in SCF-dependent proteasomal ubiquitin-dependent protein catabolic process and SCF ubiquitin ligase complex localization
CAGL0J01331g		1.86	0.0492909	3.63009	Unknown
CAGL0F04521g		1.85677	0.296685	3.62197	Ortholog of S. cerevisiae ECM13
CAGL0M12793g		1.85109	0.0726788	3.60772	Protein of unknown function
CAGL0H02563g		1.8359	0.147511	3.56993	Predicted GPI-linked protein
CAGL0M05445g		1.83085	0.237476	3.55748	Ortholog(s) have role in signal transduction
CAGL0B01078g		1.81905	0.12958	3.52848	Putative protein; gene is upregulated in azole-resistant strain	1
CAGL0L05720g		1.81346	0.316128	3.51484	Ortholog(s) have membrane localization
CAGL0D06512g		1.80732	0.143844	3.49991	Putative membrane bound guanine nucleotide exchange factor; gene is upregulated in azole-resistant strain	1
CAGL0K07634g	GAT1	1.7538	0.14765	3.37246	Ortholog(s) have DNA-binding transcription activator activity, RNA polymerase II-specific, DNA-binding transcription factor activity, sequence-specific DNA binding activity
CAGL0M08426g		1.7351	0.221718	3.32903	Putative protein; contains an ARS in its promoter; gene is upregulated in azole-resistant strain	3
CAGL0G05335g	TPS2	1.7344	0.185677	3.32741	Ortholog(s) have trehalose-phosphatase activity	1
CAGL0G06006g		1.73415	0.222543	3.32682	Ortholog(s) have endopeptidase inhibitor activity and role in vacuole fusion, non-autophagic	1
CAGL0F00649g		1.7309	0.34352	3.31935	Has domain(s) with predicted ATP binding, protein kinase activity, protein tyrosine kinase activity and role in protein phosphorylation
CAGL0G09977g	GDB1	1.71087	0.0746499	3.27357	Ortholog(s) have 4-alpha-glucanotransferase activity, amylo-alpha-1,6-glucosidase activity and role in glycogen catabolic process
CAGL0C02739g		1.71054	0.102954	3.27284	Ortholog(s) have role in mitochondrion organization, phospholipid homeostasis and integral component of mitochondrial outer membrane localization
CAGL0H05137g		1.69397	0.292638	3.23546	Ortholog(s) have aldehyde dehydrogenase [NAD(P)+] activity, role in NADPH regeneration, acetate biosynthetic process, response to salt stress and cytosol, mitochondrion localization	2
CAGL0L06512g		1.67802	0.0467495	3.19988	Ortholog(s) have role in meiotic cell cycle
CAGL0D02552g		1.67452	0.0810384	3.19213	Protein of unknown function
CAGL0K02519g		1.6695	0.140135	3.18104	Protein of unknown function
CAGL0G02739g		1.65707	0.394836	3.15376	Ortholog(s) have DNA-binding transcription factor activity, DNA-binding transcription factor activity, RNA polymerase II-specific activity
CAGL0B03465g		1.6546	0.279345	3.14836	Ortholog(s) have role in ethanol metabolic process and mitochondrial inner membrane localization
CAGL0A01650g		1.65373	0.0721407	3.14647	Putative protein; gene is upregulated in azole-resistant strain	1
CAGL0K06105g		1.64776	0.00799425	3.13346	Ortholog of S. cerevisiae BOP2
CAGL0L10362g		1.64219	0.185759	3.12138	Ortholog of S. cerevisiae YOR062C
CAGL0H04257g	MT-II	1.6321	0.222205	3.09963	Copper-binding metallothionein, involved in sequestration of metal ions; inducible by copper and silver; present in multiple (3-9) tandemly arranged copies in various strains; gene is downregulated in azole-resistant strain
CAGL0G01122g		1.6305	0.195156	3.0962	Putative protein; gene is upregulated in azole-resistant strain	3
CAGL0L10582g		1.62488	0.139385	3.08416	Has domain(s) with predicted mannosyl-oligosaccharide glucosidase activity and role in oligosaccharide metabolic process
CAGL0H03619g		1.59326	0.336796	3.01731	Unknown
CAGL0G06798g		1.59015	0.105542	3.01081	Ortholog(s) have role in iron ion homeostasis and cytoplasm, nucleus localization
CAGL0I00286g		1.58107	0.163991	2.99191	Has domain(s) with predicted transmembrane transporter activity, role in transmembrane transport and integral component of membrane, membrane localization
CAGL0E05654g		1.58096	0.178791	2.99169	Ortholog(s) have phosphatidylglycerol phospholipase C activity, role in cell-abiotic substrate adhesion, glycerophospholipid catabolic process, phosphatidylglycerol catabolic process and lipid droplet, mitochondrion localization
CAGL0K07205g		1.5745	0.210738	2.97833	Protein of unknown function
CAGL0C03872g	TIR3	1.56823	0.169431	2.9654	Putative GPI-linked cell wall protein involved in sterol uptake
CAGL0F06325g		1.56581	0.142704	2.96044	Ortholog(s) have Sin3-type complex localization	1
CAGL0E06380g		1.56197	0.215628	2.95257	Ortholog(s) have ATP-dependent NAD(P)H-hydrate dehydratase activity and role in nicotinamide nucleotide metabolic process
CAGL0C03916g		1.55879	0.25755	2.94608	Has domain(s) with predicted transferase activity, transferring glycosyl groups activity and role in protein glycosylation	1
CAGL0K03421g		1.55558	0.0500491	2.93951	Ortholog(s) have phosphoglucomutase activity
CAGL0E05654g		1.55078	0.181779	2.92976	Ortholog(s) have phosphatidylglycerol phospholipase C activity, role in cell-abiotic substrate adhesion, glycerophospholipid catabolic process, phosphatidylglycerol catabolic process and lipid droplet, mitochondrion localization
CAGL0M11902g		1.54836	0.448279	2.92484	Ortholog of S. cerevisiae FUN19
CAGL0H00528g		1.53586	0.0446586	2.89961	Ortholog(s) have histone demethylase activity (H3-K4 specific), histone demethylase activity (H3-dimethyl-K4 specific) and histone demethylase activity (H3-monomethyl-K4 specific), more
CAGL0F02717g	PDH1	1.52882	0.216816	2.88549	Multidrug transporter, predicted plasma membrane ATP-binding cassette (ABC) transporter; regulated by Pdr1p; involved in fluconazole resistance	5
CAGL0J05082g		1.50622	0.0208086	2.84064	Has domain(s) with predicted ATP binding, protein kinase activity, protein tyrosine kinase activity and role in protein phosphorylation
CAGL0A00341g		1.50423	0.0583137	2.83672	Ortholog(s) have role in sphingoid catabolic process
CAGL0F01111g		1.50328	0.0665604	2.83487	Ortholog(s) have nuclear import signal receptor activity, role in inositol metabolic process, protein import into nucleus and nuclear envelope localization
CAGL0F07865g	UPC2B	1.49979	0.246934	2.82802	Putative Zn(2)-Cys(6) binuclear cluster transcriptional regulator of ergosterol biosynthesis
CAGL0H08844g		1.49602	0.17107	2.82064	Putative adhesin-like protein	1
CAGL0M04675g		1.48985	0.0329823	2.8086	Ortholog(s) have thiosulfate sulfurtransferase activity	1
CAGL0M10285g		1.47648	0.00650705	2.7827	Ortholog(s) have chromatin binding, methylated histone binding activity and role in negative regulation of transcription by RNA polymerase II
CAGL0K03575g		1.4662	0.339876	2.76292	Unknown
CAGL0G01408g		1.46298	0.145941	2.75677	Protein of unknown function
CAGL0B03421g		1.44375	0.0618214	2.72027	Ortholog(s) have DNA-binding transcription activator activity, RNA polymerase II-specific, RNA polymerase II proximal promoter sequence-specific DNA binding activity
CAGL0C04191g		1.43711	0.123029	2.70778	Ortholog(s) have succinate-semialdehyde dehydrogenase [NAD(P)+] activity, role in cellular response to oxidative stress, gamma-aminobutyric acid catabolic process, glutamate decarboxylation to succinate and mitochon localization
CAGL0C05027g		1.42172	0.185735	2.67905	Ortholog(s) have role in acetate catabolic process, carnitine metabolic process, cellular respiration and cytosol, mitochondrion localization	2
CAGL0H10010g		1.41583	0.259866	2.66813	Protein of unknown function
CAGL0H03663g		1.40725	0.151602	2.65231	Ortholog(s) have isocitrate dehydrogenase (NADP+) activity, role in fatty acid beta-oxidation and cytoplasm, peroxisomal importomer complex, peroxisome localization
CAGL0G03047g		1.40698	0.0220684	2.65182	Ortholog(s) have protein kinase activity, protein kinase activity involved in regulation of protein localization to cell division site involved in cytokinesis, protein serine/threonine kinase activity
CAGL0K07678g		1.40597	0.110513	2.64997	Protein of unknown function
CAGL0J03190g		1.39646	0.0880894	2.63254	Ortholog(s) have actin filament binding activity, role in negative regulation of actin filament polymerization and Aim21-Tda2 complex, actin cortical patch localization
CAGL0D05082g		1.38973	0.439181	2.6203	Protein of unknown function
CAGL0F04895g		1.38526	0.100019	2.61218	Ortholog(s) have glycogen phosphorylase activity, role in glycogen catabolic process, response to heat and cell surface, cytoplasm, hyphal cell wall localization
CAGL0B00638g		1.35068	0.0874443	2.55033	Ortholog(s) have ATPase activity, nicotinamide-nucleotide adenylyltransferase activity
CAGL0L13299g	EPA11	1.34732	0.30184	2.54439	Putative adhesin; belongs to adhesin cluster I
CAGL0K04631g		1.3418	0.349748	2.53467	Ortholog(s) have role in positive regulation of cell adhesion involved in single-species biofilm formation, positive regulation of cell-substrate adhesion and regulation of transcription by RNA polymerase II, more
CAGL0C04323g		1.34126	0.064269	2.53372	Ortholog(s) have alpha,alpha-trehalase activity and role in trehalose catabolic process
CAGL0L03696g		1.3396	0.119348	2.53081	Has domain(s) with predicted role in transmembrane transport and integral component of membrane localization
CAGL0M13365g		1.33311	0.0717675	2.51946	Ortholog(s) have role in ascospore wall assembly, ascospore-type prospore membrane assembly and prospore membrane, prospore membrane leading edge localization
CAGL0M03399g		1.32671	0.0194477	2.50829	Ortholog(s) have ubiquitin-protein transferase activity and role in negative regulation of gluconeogenesis, proteasome-mediated ubiquitin-dependent protein catabolic process, ubiquitin-dependent protein catabolic process
CAGL0M13189g	MSN4	1.3258	0.16479	2.50671	Putative transcription factor similar to S. cerevisiae Msn4p; involved in response to oxidative stress
CAGL0I08943g		1.32065	0.529144	2.49779	Has domain(s) with predicted nucleic acid binding, nucleotide binding activity
CAGL0B04675g		1.3082	0.0388464	2.47633	Ortholog(s) have RNA binding, endoribonuclease activity, ribosome binding activity
CAGL0L05016g		1.29782	0.234615	2.45858	Unknown
CAGL0K04235g		1.29498	0.0101604	2.45374	Putative transaldolase	1
CAGL0F01265g	YAP7	1.29383	0.278317	2.45178	bZIP domain-containing protein involved in regulation of nitric oxide detoxification
CAGL0B00616g		1.29383	0.0224696	2.45178	Ecm33-family protein with a predicted role in cell wall biogenesis and organization; predicted GPI-anchor	2
CAGL0I05390g		1.29256	0.286396	2.44963	Ortholog(s) have protein kinase activity, protein serine/threonine kinase activity
CAGL0K03459g		1.28636	0.105473	2.43912	Ortholog of S.cerevisiae SPG4
CAGL0K04939g		1.2857	0.0842431	2.43801	Ortholog(s) have endopolyphosphatase activity, role in polyphosphate catabolic process and fungal-type vacuole, vacuolar lumen localization
CAGL0M12474g		1.28071	0.129563	2.42958	Ortholog of S. cerevisiae YIL055C	2
CAGL0H02893g		1.26781	0.229494	2.40796	Has domain(s) with predicted deaminase activity and role in purine ribonucleoside monophosphate biosynthetic process
CAGL0I01122g	GRE3	1.2628	0.0696953	2.39961	Ortholog(s) have D-xylose:NADP reductase activity, NADPH binding, alditol:NADP+ 1-oxidoreductase activity, mRNA binding activity
CAGL0M03025g		1.26213	0.485212	2.39849	Ortholog(s) have DNA-binding transcription activator activity, RNA polymerase II-specific, DNA-binding transcription factor activity, RNA polymerase II proximal promoter sequence-specific DNA binding activity
CAGL0C04587g		1.25879	0.317835	2.39294	Unknown
CAGL0L08426g	SUE1	1.25701	0.0244905	2.39	Ortholog(s) have role in protein catabolic process and mitochondrial envelope localization
CAGL0G06182g		1.25682	0.0865211	2.38969	Unknown
CAGL0G02101g	ECM4	1.25226	0.438064	2.38215	Putative omega class glutathione transferase; gene is downregulated in azole-resistant strain
CAGL0K04323g		1.24814	0.246492	2.37536	Unknown
CAGL0L11990g		1.24249	0.190554	2.36607	Ortholog(s) have RNA polymerase II activating transcription factor binding, disulfide oxidoreductase activity
CAGL0B00616g		1.23536	0.0102611	2.3544	Ecm33-family protein with a predicted role in cell wall biogenesis and organization; predicted GPI-anchor
CAGL0M08184g	STE3	1.23315	0.0434182	2.3508	Putative a-factor pheromone receptor
CAGL0H02717g		1.20577	0.433063	2.30661	Ortholog(s) have pseudouridylate synthase activity, role in pseudouridine synthesis, rRNA modification and mitochondrion localization
CAGL0G04763g		1.20453	0.441399	2.30462	Has domain(s) with predicted role in termination of G protein-coupled receptor signaling pathway
CAGL0C00539g		1.20133	0.107676	2.29951	Ortholog(s) have role in positive regulation of (R)-carnitine transmembrane transport, positive regulation of polyamine transmembrane transport
CAGL0L09273g		1.19703	0.458056	2.29267	Ortholog(s) have isocitrate lyase activity, methylisocitrate lyase activity, role in propionate catabolic process, 2-methylcitrate cycle and mitochondrial matrix, mitochondrion localization
CAGL0K10868g	CTA1	1.19689	0.0985045	2.29245	Putative catalase A; gene is downregulated in azole-resistant strain; regulated by oxidative stress and glucose starvation; protein abundance increased in ace2 mutant cells
CAGL0D05236g		1.18901	0.350134	2.27997	Has domain(s) with predicted nucleic acid binding, nucleotide binding activity
CAGL0M13541g		1.17382	0.199952	2.25608	Ortholog(s) have protein serine/threonine kinase activity, role in cellular response to oxidative stress, fungal-type cell wall organization, peptidyl-serine phosphorylation and cytoplasm, nucleus localization
CAGL0C01397g		1.16841	0.0153381	2.24764	Ortholog(s) have 6-phosphofructo-2-kinase activity and role in fructose 2,6-bisphosphate metabolic process
CAGL0D06688g	ALD4	1.15949	0.3309	2.23378	Ortholog(s) have aldehyde dehydrogenase (NAD) activity, aldehyde dehydrogenase [NAD(P)+] activity and role in NADPH regeneration, acetate biosynthetic process, ethanol metabolic process, pyruvate metabolic process
CAGL0L02827g		1.15261	0.0227617	2.22316	Ortholog(s) have protein tyrosine phosphatase activity, role in inactivation of MAPK activity, maintenance of protein location in nucleus, peptidyl-tyrosine dephosphorylation, regulation of sporulation and nucleus localization
CAGL0G01540g	NCE13	1.14787	0.274503	2.21587	Beta carbonic anhydrase with a predicted role in non-classical protein export; upregulated in azole-resistant strain; enzyme activity increased by amines and amino acids; protein abundance decreased in ace2 cells	2
CAGL0I07359g	INO4	1.13932	0.0871792	2.20277	Transcriptional regulator involved in de novo inositol biosynthesis; activator of INO1 gene expression; mutants unable to grow in the absence of inositol
CAGL0I05874g		1.13423	0.283521	2.19501	Haloacid dehalogenase-like hydrolase
CAGL0I09086g		1.11655	0.167273	2.16828	Has domain(s) with predicted role in transmembrane transport and integral component of membrane localization
CAGL0F06061g		1.11172	0.19753	2.16102	Ortholog(s) have D-arabinose 1-dehydrogenase [NAD(P)+] activity and role in dehydro-D-arabinono-1,4-lactone biosynthetic process
CAGL0K06259g	TSA1	1.11057	0.28643	2.15932	Thiol-specific antioxidant protein; predicted thioredoxin peroxidase involved in oxidative stress response; protein abundance decreased in ace2 mutant cells
CAGL0E00649g		1.10579	0.0248945	2.15217	Ortholog(s) have [pyruvate dehydrogenase (lipoamide)] phosphatase activity, magnesium-dependent protein serine/threonine phosphatase activity, protein serine/threonine phosphatase activity
CAGL0F01859g		1.10545	0.102037	2.15166	Ortholog(s) have role in ascospore wall assembly and cytoplasm, prospore membrane localization
CAGL0G04829g		1.10544	0.0835787	2.15164	Protein of unknown function
CAGL0F06941g	PYC1	1.09615	0.318205	2.13783	Putative pyruvate carboxylase isoform; gene is upregulated in azole-resistant strain
CaglfMp09_ATP6		1.09504	0.0906438	2.13618	Unknown
CAGL0M06633g		1.09115	0.0136463	2.13044	Protein of unknown function	1
CAGL0B04455g		1.08957	0.0556575	2.1281	Ortholog(s) have L-glutamine transmembrane transporter activity, L-isoleucine transmembrane transporter activity, L-tyrosine transmembrane transporter activity and role in amino acid transmembrane export from vacuole	1
CAGL0I02530g		1.08893	0.00377661	2.12716	Ortholog(s) have N,N-dimethylaniline monooxygenase activity, role in protein folding and endoplasmic reticulum membrane localization
CAGL0M05841g		1.08385	0.373841	2.11968	Ortholog(s) have alpha-1,2-mannosyltransferase activity, mannosylphosphate transferase activity, mannosyltransferase activity and role in cell wall mannoprotein biosynthetic process, protein N-linked glycosylation
CAGL0C02321g	PHM8	1.08096	0.180501	2.11544	Ortholog(s) have lysophosphatidic acid phosphatase activity, nucleotidase activity and role in cellular response to phosphate starvation, nucleotide catabolic process, response to carbon starvation, triglyceride homeostasis
CAGL0H00374g	SST2	1.08035	0.0950187	2.11454	Aspartyl protease that degrades alpha-factor
CAGL0M04499g		1.07998	0.466764	2.11401	Ortholog(s) have proline dehydrogenase activity, role in proline catabolic process to glutamate and mitochondrion localization
CAGL0H10362g		1.0705	0.336207	2.10015	Ortholog(s) have protein binding, bridging activity and role in proteasome regulatory particle assembly
CAGL0M13255g		1.06481	0.000837964	2.09189	Ortholog(s) have endoplasmic reticulum localization
CAGL0H06017g	FLR1	1.06468	0.106644	2.09171	Multidrug transporter of the major facilitator superfamily involved in 5-flucytosine resistance; gene is downregulated in azole-resistant strain
CAGL0K07458g		1.06288	0.100209	2.0891	Ortholog(s) have protein serine/threonine kinase activity	1
CAGL0J09812g	TPS1	1.05847	0.301632	2.08272	Ortholog(s) have alpha,alpha-trehalose-phosphate synthase (UDP-forming) activity, trehalose-phosphatase activity
CAGL0C03113g		1.05276	0.107272	2.0745	Ortholog(s) have RNA 7-methylguanosine cap binding, exoribonuclease activator activity, hydrolase activity, acting on acid anhydrides, in phosphorus-containing anhydrides, m7G(5')pppN diphosphatase activity	1
CAGL0I10747g		1.04873	0.0230139	2.06871	Ortholog(s) have ammonium transmembrane transporter activity, role in ammonium transport, nitrogen utilization and plasma membrane localization
CAGL0K06677g	MET8	1.03871	0.0127143	2.05439	Putative bifunctional dehydrogenase and ferrochelatase; gene is upregulated in azole-resistant strain
CAGL0I01100g	GCY1	1.03808	0.169683	2.05349	Ortholog(s) have alditol:NADP+ 1-oxidoreductase activity, aldo-keto reductase (NADP) activity, glycerol dehydrogenase [NAD(P)+] activity, mRNA binding, oxidoreductase activity
CAGL0C00451g		1.03769	0.16692	2.05294	Protein of unknown function
CAGL0I04180g	AMT1	1.03675	0.0529055	2.0516	Metal-activated transcription factor; binds promoters of metallothionein genes; autoregulates its own expression; gene is downregulated in azole-resistant strain
CAGL0K12254g		1.03291	0.309061	2.04614	Ortholog(s) have role in negative regulation of gluconeogenesis, proteasome-mediated ubiquitin-dependent protein catabolic process, protein catabolic process in the vacuole, protein targeting to vacuole
CAGL0G04785g		1.03183	0.196122	2.04462	Protein of unknown function
CAGL0A01716g		1.02596	0.366446	2.03631	Ortholog(s) have nicotinamidase activity and role in chromatin silencing at rDNA, chromatin silencing at telomere, negative regulation of DNA amplification, replicative cell aging
CAGL0A02321g	HXT3	1.02538	0.0914236	2.03549	Ortholog(s) have fructose transmembrane transporter activity, glucose transmembrane transporter activity, mannose transmembrane transporter activity
CAGL0I05962g		1.02335	0.0013031	2.03263	Ortholog(s) have role in meiotic cell cycle
CAGL0K10714g		1.01627	0.481963	2.02269	Ortholog(s) have ubiquitin protein ligase binding activity and role in adaptation of signaling pathway by response to pheromone involved in conjugation with cellular fusion, positive regulation of receptor internalization
CAGL0D05940g	ERG1	1.01611	0.344888	2.02245	Squalene epoxidase with a role in ergosterol synthesis; involved in growth under conditions of low oxygen tension
CAGL0M04763g		1.01606	0.201767	2.02238	Ortholog(s) have role in cellular response to drug
CAGL0B01925g		1.00981	0.0975297	2.01364	Ortholog(s) have protein serine/threonine kinase activity
CAGL0L07480g		1.00703	0.0353719	2.00977	Ortholog(s) have DNA-binding transcription factor activity, double-stranded DNA binding, sequence-specific DNA binding activity
CAGL0L00649g		1.0054	0.745244	2.0075	Acetyl-coenzyme A synthetase
CAGL0K04961g	YPD1	1.00198	0.214886	2.00274	Predicted phosphohistidine intermediate protein in a phosphorelay signal transduction pathway
CAGL0B01100g		1.00118	0.0448761	2.00164	Phosphatidylethanolamine-binding protein	1
CAGL0K12408g		-1.00638	0.263978	0.497793	Ortholog(s) have phosphatidylinositol deacylase activity
CAGL0F07645g		-1.00759	0.221376	0.497375	Ortholog(s) have role in endonucleolytic cleavage in 5'-ETS of tricistronic rRNA transcript (SSU-rRNA, 5.8S rRNA and LSU-rRNA), more
CAGL0M08448g		-1.01201	0.416418	0.495855	Ortholog(s) have mannose-ethanolamine phosphotransferase activity and role in ATP transport, GPI anchor biosynthetic process, conidium formation, regulation of growth rate
CAGL0K00231g		-1.01306	0.00675951	0.495493	Ortholog(s) have 5-oxoprolinase (ATP-hydrolyzing) activity and role in glutathione metabolic process
CAGL0J00847g		-1.01731	0.526695	0.494037	Ortholog(s) have succinate dehydrogenase (ubiquinone) activity, role in cellular respiration and mitochondrion localization
CAGL0K01397g	FMNAT	-1.01859	0.0749749	0.493598	Flavin mononucleotide adenylyltransferase (FMNAT); catalyzes the formation of the essential flavocoenzyme flavin adenine dinucleotide (FAD) and plays an important role in flavocoenzyme homeostasis regulation
CAGL0E01023g		-1.02539	0.0290769	0.491276	Ortholog(s) have RNA binding activity, role in mRNA cis splicing, via spliceosome, mRNA splicing, via spliceosome and Prp19 complex, U2-type spliceosomal complex, post-mRNA release spliceosomal complex, spliceosomal complex localization
CAGL0I09746g		-1.03196	0.424804	0.489045	Ortholog(s) have phosphoenolpyruvate transmembrane transporter activity and role in endoplasmic reticulum to Golgi vesicle-mediated transport, phosphoenolpyruvate transmembrane import into Golgi lumen
CAGL0K01001g		-1.03462	0.0671396	0.488145	Ortholog(s) have role in protein localization to plasma membrane, protein targeting to vacuole, receptor-mediated endocytosis, response to pheromone and actin cortical patch, cytosol, endosome, plasma membrane localization
CAGL0I10246g	PWP2	-1.03871	0.290738	0.486764	Adhesin-like protein with tandem repeats; contains a PA14 domain; belongs to adhesin cluster II 2010-10-20
CAGL0K00649g		-1.03889	0.21766	0.486702	Ortholog(s) have role in endoplasmic reticulum to Golgi vesicle-mediated transport and endoplasmic reticulum, integral component of membrane localization
CAGL0F02013g		-1.03974	0.640688	0.486414	Ortholog(s) have nucleus localization
CAGL0A03080g		-1.04451	0.284334	0.484809	Ortholog(s) have role in mitochondrial respiratory chain complex II assembly
CAGL0K00407g		-1.04529	0.248447	0.484548	Ortholog(s) have ER membrane protein complex localization
CAGL0H07601g		-1.04632	0.139311	0.484201	Ortholog(s) have DNA helicase activity, MutLbeta complex binding, heteroduplex DNA loop binding activity
CAGL0I01188g		-1.04674	0.09775	0.48406	Ortholog(s) have GTP binding, GTPase activity, molecular adaptor activity, phosphatidylinositol-4-phosphate binding, phosphatidylinositol-5-phosphate binding, structural molecule activity
CAGL0K01331g		-1.04763	0.105236	0.483763	Ortholog(s) have phosphoprotein phosphatase activity, protein serine/threonine phosphatase activity
CAGL0E02233g		-1.04803	0.456383	0.483629	Protein of unknown function
CAGL0I05082g		-1.05488	0.161218	0.481336	Has domain(s) with predicted nucleic acid binding, nucleotide binding activity
CAGL0K01045g		-1.05894	0.043768	0.479984	Ortholog(s) have enzyme regulator activity, guanyl-nucleotide exchange factor activity, translation initiation factor activity and role in cytoplasmic translational initiation, regulation of translational initiation
CAGL0I09856g		-1.05912	0.235756	0.479926	Ortholog(s) have role in mitotic cell cycle, pseudohyphal growth and nucleus localization
CAGL0G04719g		-1.05985	0.476463	0.479683	Ortholog(s) have phosphatidylinositol-3,5-bisphosphate 5-phosphatase activity, phosphatidylinositol-3-phosphatase activity, phosphatidylinositol-4,5-bisphosphate 5-phosphatase activity, phosphatidylinositol-4-phosphate phosphatase activity
CAGL0J09548g		-1.06732	0.0123231	0.477205	Ortholog(s) have DNA translocase activity, RNA polymerase II activating transcription factor binding activity
CAGL0F01727g		-1.0687	0.0986074	0.476748	Ortholog(s) have 3'-5'-exoribonuclease activity
CAGL0K00539g		-1.0836	0.137818	0.471851	Has domain(s) with predicted role in intracellular protein transport, vesicle-mediated transport and clathrin adaptor complex localization
CAGL0J07590g		-1.08517	0.641228	0.471338	Ortholog(s) have role in iron-sulfur cluster assembly and cytosol, membrane localization
CAGL0H01947g		-1.08586	0.174769	0.471112	Unknown
CAGL0J07216g		-1.08859	0.115822	0.470221	Ortholog(s) have double-stranded DNA binding activity
CAGL0B03905g		-1.08924	0.0680151	0.470009	Ortholog(s) have mannosyltransferase activity, role in GPI anchor biosynthetic process, fungal-type cell wall organization, hyphal growth and glycosylphosphatidylinositol-mannosyltransferase I complex localization
CAGL0C03443g	LYS9	-1.0913	0.22479	0.469338	Putative saccharopine dehydrogenase
CAGL0K01441g		-1.09968	0.0909118	0.46662	Ortholog(s) have RNA binding activity, role in spliceosomal complex assembly and U2-type prespliceosome localization
CAGL0K07788g		-1.10118	0.178784	0.466136	Ortholog(s) have L-aminoadipate-semialdehyde dehydrogenase activity and role in lysine biosynthetic process, lysine biosynthetic process via aminoadipic acid
CAGL0M04191g	YPS1	-1.10334	0.503983	0.465438	Yapsin family aspartic protease; predicted GPI-anchor; complements cell wall defect phenotypes of S. cerevisiae yps1 mutant; regulation of pH homeostasis under acid conditions; induced by high temperature, Slt1- and Crz1p-dependent
CAGL0K01177g		-1.11449	0.21219	0.461853	Ortholog(s) have tubulin binding activity, role in response to cold, tubulin complex assembly and cytoplasm, polysome, prefoldin complex localization
CAGL0M08514g	PIR5	-1.12319	0.83743	0.459078	Pir protein family member, putative cell wall component
CAGL0I08415g		-1.13382	0.372689	0.455708	Ortholog(s) have role in negative regulation of transposition, RNA-mediated, nonfunctional rRNA decay, recombinational repair, replication fork processing and Cul8-RING ubiquitin ligase complex localization
CAGL0F08371g	TNA1	-1.14648	0.200571	0.451726	High-affinity nicotinic acid transporter; strongly induced under niacin-limiting conditions
CAGL0M10263g		-1.14989	0.195227	0.450661	Protein of unknown function
CAGL0J08349g		-1.15342	0.364998	0.449558	Has domain(s) with predicted phospholipid binding activity
CAGL0M07381g		-1.15361	0.0117009	0.449499	Ortholog(s) have mannosylphosphate transferase activity, role in fungal-type cell wall organization, protein N-linked glycosylation and membrane localization
CAGL0K00979g		-1.16086	0.35035	0.447246	Ortholog(s) have role in cellular response to drug, cellular response to neutral pH, cellular response to starvation, filamentous growth and filamentous growth of a population of unicellular organisms, more
CAGL0M09108g		-1.16325	0.428444	0.446506	Ortholog(s) have mRNA binding activity and role in cellular protein-containing complex localization, establishment of mitochondrion localization, nuclear-transcribed mRNA catabolic process, deadenylation-dependent decay
CAGL0M14047g		-1.17956	0.24266	0.441487	Putative NADPH-dependent cinnamyl alcohol dehydrogenase; gene is upregulated in azole-resistant strain
CAGL0F02519g		-1.18311	0.101928	0.440402	Has domain(s) with predicted DNA binding, DNA-binding transcription factor activity, RNA polymerase II-specific, zinc ion binding activity and role in regulation of transcription, DNA-templated, transcription, DNA-templated
CAGL0K00495g		-1.18603	0.260557	0.439512	Ortholog(s) have role in deadenylation-dependent decapping of nuclear-transcribed mRNA, mRNA catabolic process, negative regulation of translation and cytoplasmic stress granule, polysome localization
CAGL0K00781g		-1.1905	0.0892443	0.438149	Has domain(s) with predicted GTP binding activity
CAGL0F06875g		-1.19112	0.0815472	0.437964	Ortholog(s) have mRNA binding, saccharopine dehydrogenase (NAD+, L-lysine-forming) activity and role in lysine biosynthetic process, lysine biosynthetic process via aminoadipic acid
CAGL0G05225g	DOS1	-1.19297	0.333584	0.4374	Protein with a predicted role in genome stability
CAGL0K01243g		-1.19812	0.105593	0.435842	Ortholog(s) have structural constituent of ribosome activity and mitochondrial large ribosomal subunit, mitochondrial ribosome localization
CAGL0B00990g	HBN1	-1.19898	0.329437	0.435584	Ortholog(s) have oxidoreductase activity, acting on NAD(P)H, nitrogenous group as acceptor activity, role in cellular response to oxidative stress, negative regulation of fatty acid metabolic process and extracellular region localization
CAGL0C03245g		-1.19918	0.555159	0.435522	Ortholog(s) have Atg12 transferase activity
CAGL0E06446g		-1.20018	0.344333	0.435221	Ortholog(s) have RNA lariat debranching enzyme activity and role in RNA catabolic process, mRNA cis splicing, via spliceosome, mRNA splicing, via spliceosome, pseudohyphal growth, snoRNA metabolic process, transposition, RNA-mediated
CAGL0K00473g		-1.20165	0.0915822	0.434778	Ortholog(s) have Ran GTPase binding activity, role in tRNA export from nucleus, tRNA re-export from nucleus and cytoplasm, nuclear matrix localization
CAGL0M00176g	BAT2	-1.20224	0.0116079	0.434599	Ortholog(s) have L-isoleucine transaminase activity, L-leucine transaminase activity, L-valine transaminase activity, branched-chain-amino-acid transaminase activity
CAGL0J00935g		-1.20467	0.0904022	0.433869	Ortholog(s) have ATPase activator activity, role in protein import into mitochondrial matrix and PAM complex, Tim23 associated import motor, TIM23 mitochondrial import inner membrane translocase complex localization
CAGL0J08052g		-1.21935	0.238563	0.429476	Ortholog(s) have role in endoplasmic reticulum to Golgi vesicle-mediated transport and COPII-coated ER to Golgi transport vesicle, endoplasmic reticulum membrane, integral component of Golgi membrane localization
CAGL0J09416g		-1.22235	0.447136	0.428584	Ortholog(s) have fungal-type vacuole lumen, fungal-type vacuole membrane localization
CAGL0F07623g		-1.2237	0.00553835	0.428182	Ortholog of S. cerevisiae MTC2
CAGL0K00759g	ZPR1	-1.22389	0.195988	0.428125	Protein with similarity to M. musculus zinc finger protein Zpr1p
CAGL0I05148g	DLD1	-1.23176	0.258825	0.425798	D-lactate ferricytochrome C oxidoreductase
CAGL0H03487g	AFT1	-1.26233	0.107282	0.41687	Putative RNA polymerase II transcription factor, involved in regulation of iron acquisition genes; required for growth under iron depletion
CAGL0K00957g		-1.26563	0.368576	0.415918	Ortholog(s) have microtubule binding activity, role in protein urmylation, regulation of transcription by RNA polymerase II, tRNA wobble uridine modification and Elongator holoenzyme complex, cytoplasm, nucleus localization
CAGL0F08393g		-1.2774	0.268152	0.412537	Ortholog(s) have role in Golgi to vacuole transport, protein targeting to vacuole and AP-3 adaptor complex localization
CAGL0J09416g		-1.29327	0.339483	0.408026	Ortholog(s) have fungal-type vacuole lumen, fungal-type vacuole membrane localization
CAGL0K01265g		-1.29637	0.0653206	0.40715	Ortholog(s) have role in cellular response to starvation, filamentous growth and filamentous growth of a population of unicellular organisms in response to biotic stimulus, more
CAGL0J04466g		-1.3057	0.195341	0.404526	Ortholog(s) have role in fungal-type cell wall organization, protein complex oligomerization and cell cortex of cell tip, membrane raft, plasma membrane localization
CAGL0I05934g		-1.30839	0.170187	0.403772	Ortholog(s) have ubiquitin-protein transferase regulator activity and role in cellular response to water deprivation, stress-induced homeostatically regulated protein degradation pathway
CAGL0K01463g	SIR2	-1.33606	0.176659	0.396102	Putative NAD+ dependent histone deacetylase of the Sirtuin family, involved in subtelomeric silencing
CAGL0H05093g		-1.3538	0.118023	0.39126	Ortholog(s) have tRNA binding activity
CAGL0M03839g		-1.35658	0.195208	0.390506	Ortholog(s) have role in apoptotic process, calcium-mediated signaling, endoplasmic reticulum unfolded protein response and endoplasmic reticulum, fungal-type vacuole, mitochondrion localization
CAGL0K01023g		-1.37384	0.0539574	0.385862	Ortholog(s) have structural constituent of ribosome activity and mitochondrial small ribosomal subunit localization
CAGL0B03949g		-1.37963	0.173648	0.384318	Protein of unknown function
CAGL0I01254g		-1.38841	0.0406321	0.381987	Ortholog(s) have URM1 activating enzyme activity, nitrate reductase (NADPH) activity, protein adenylyltransferase activity, sulfurtransferase activity, thiosulfate sulfurtransferase activity
CAGL0C03047g		-1.3993	1.09667	0.379114	Ortholog(s) have role in DNA replication-independent nucleosome organization, chromatin remodeling and FACT complex, nucleus localization
CAGL0H06853g	ADH6	-1.41805	0.129069	0.374217	Putative NADP-dependent alcohol dehydrogenase VI; protein abundance increased in ace2 mutant cells
CAGL0H10428g		-1.42756	0.0885904	0.371759	Ortholog(s) have phosphatidylinositol-3-phosphate binding activity and role in autophagy of mitochondrion, early endosome to Golgi transport, macroautophagy, protein localization by the Cvt pathway
CAGL0E04180g		-1.43118	0.0708585	0.370827	Has domain(s) with predicted role in dolichol-linked oligosaccharide biosynthetic process
CAGL0K00913g		-1.4543	0.00501842	0.364932	Ortholog(s) have formate-tetrahydrofolate ligase activity, methenyltetrahydrofolate cyclohydrolase activity, methylenetetrahydrofolate dehydrogenase (NADP+) activity, single-stranded DNA binding activity
CAGL0K01419g		-1.45682	0.169525	0.364296	Ortholog(s) have RNA binding activity, role in mRNA processing, mitochondrial translation and mitochondrion localization
CAGL0J07502g		-1.51216	0.279092	0.350587	Putative protein similar to globins with a heme-binding domain; gene is upregulated in azole-resistant strain
CAGL0K12056g		-1.51653	0.167839	0.349524	Ortholog(s) have structural constituent of ribosome activity and mitochondrial ribosome, mitochondrial small ribosomal subunit localization
CAGL0K00583g		-1.54938	0.279525	0.341658	Ortholog(s) have fatty acid elongase activity and role in fatty acid elongation, unsaturated fatty acid
CAGL0K06743g	YBP1	-1.56112	0.378027	0.338888	Protein involved in resistance to hydrogen peroxide; S. cerevisiae ortholog Ybp1p has role in cellular response to oxidative stress and localizes to cytoplasm
CAGL0G00858g		-1.58583	0.17108	0.333132	Ortholog(s) have transmembrane signaling receptor activity
CAGL0H02035g		-1.59692	0.134522	0.330583	Ortholog(s) have histone acetyltransferase activity, methylated histone binding activity
CAGL0G07249g		-1.6086	0.359374	0.327916	Ortholog(s) have RNA polymerase II regulatory region sequence-specific DNA binding activity, role in negative regulation of transcription involved in G1/S transition of mitotic cell cycle and nuclear chromatin, nucleus localization
CAGL0E01485g		-1.61389	0.504197	0.326715	Ortholog(s) have role in positive regulation of TORC1 signaling and Seh1-associated complex, extrinsic component of fungal-type vacuolar membrane localization
CAGL0K00363g		-1.63551	0.163209	0.321856	Ortholog(s) have ATPase activity, coupled to transmembrane movement of substances, oligopeptide transmembrane transporter activity, oligopeptide-transporting ATPase activity, peptide-transporting ATPase activity
CAGL0G02585g	LYS12	-1.65876	0.21787	0.316712	Homo-isocitrate dehydrogenase
CAGL0K01771g		-1.65934	0.242059	0.316585	Has domain(s) with predicted transferase activity, transferring acyl groups activity
CAGL0K03619g		-1.68042	0.326275	0.311992	Ortholog(s) have role in centromere clustering, chromosome segregation and Ndc80 complex, condensed nuclear chromosome kinetochore localization
CAGL0K01485g		-1.71633	0.269838	0.304322	Ortholog(s) have pseudouridine synthase activity, role in tRNA pseudouridine synthesis and mitochondrion localization
CAGL0F02827g		-1.75893	0.243326	0.295467	Ortholog(s) have role in endoplasmic reticulum unfolded protein response, ubiquitin-dependent ERAD pathway and Doa10p ubiquitin ligase complex, Hrd1p ubiquitin ligase ERAD-L complex, endoplasmic reticulum localization
CAGL0H00506g	ATP2	-1.84343	0.551606	0.278658	F1F0-ATPase complex, F1 beta subunit; expression upregulated in biofilm vs planktonic cell culture; protein abundance decreased in ace2 mutant cells
CAGL0D04246g		-1.9052	0.241968	0.266979	Ortholog(s) have role in late endosome to vacuole transport, protein transport to vacuole involved in ubiquitin-dependent protein catabolic process via the multivesicular body sorting pathway
CAGL0J06864g		-1.90559	0.105092	0.266907	Ortholog(s) have role in meiotic DNA recombinase assembly, reciprocal meiotic recombination and condensed nuclear chromosome localization
CAGL0K03157g	DUR31	-1.92941	0.0724938	0.262536	Putative plasma membrane polyamine transporter
CAGL0H00110g		-1.96756	0.591246	0.255684	Adhesin-like protein with internal repeats; predicted GPI-anchor; likely a C-terminal fragment of a single ORF with CAGL0H00132g; belongs to adhesin cluster V
CAGL0K00605g		-1.98289	0.199837	0.252983	Ortholog(s) have ATP binding, ATPase activity, DNA replication origin binding, GTP binding, GTPase activity, chromatin binding, protein serine/threonine kinase activity
CAGL0H08261g		-2.03471	0.26415	0.244057	Ortholog(s) have role in autophagy of mitochondrion
CAGL0K13024g	AED1	-2.0766	0.464663	0.237072	Adhesin-like protein required for adherence to endothelial cells; identified in cell wall extracts by mass spectrometry; belongs to adhesin cluster III; predicted GPI anchor; 6 tandem repeats; expressed more in stationary growth pHase
CAGL0C04499g		-2.08068	0.00113038	0.236403	Ortholog(s) have MAP kinase serine/threonine phosphatase activity, magnesium-dependent protein serine/threonine phosphatase activity, protein serine/threonine phosphatase activity
CAGL0M01848g		-2.15585	0.465334	0.224401	Ortholog(s) have role in lysosomal microautophagy, signal transduction and EGO complex, fungal-type vacuole membrane, late endosome membrane localization
CAGL0L00157g		-2.18996	0.568054	0.219158	Putative adhesin-like protein; multiple tandem repeats; predicted GPI-anchor; belongs to adhesin cluster III
CAGL0J05060g	ZAP1	-2.24834	0.175224	0.210467	Ortholog(s) have DNA-binding transcription factor activity, RNA polymerase II-specific, RNA polymerase II regulatory region sequence-specific DNA binding, zinc ion binding activity
CAGL0E06666g	EPA2	-2.24905	0.192068	0.210362	Epithelial adhesion protein; predicted GPI-anchor; belongs to adhesin cluster I
CAGL0A03102g	ARO1	-2.26524	0.221435	0.208015	Ortholog(s) have carboxy-lyase activity, phenylpyruvate decarboxylase activity
CAGL0E01353g		-2.36728	0.323839	0.193811	Putative high-affinity zinc transporter; gene is downregulated in azole-resistant strain
CAGL0K01089g		-2.41701	0.0760154	0.187244	Ortholog(s) have role in maturation of SSU-rRNA from tricistronic rRNA transcript (SSU-rRNA, 5.8S rRNA, LSU-rRNA), ribosomal small subunit export from nucleus and 90S preribosome, preribosome, small subunit precursor localization
CAGL0G07183g2		-2.47906	0.108606	0.179361	Unknown
CAGL0L12320g		-2.48124	0.295937	0.17909	Ortholog(s) have role in mitochondrial genome maintenance, mitochondrial tRNA 5'-end processing and matrix side of mitochondrial inner membrane localization
CAGL0E04774g		-2.48376	0.131981	0.178778	Has domain(s) with predicted role in response to oxidative stress
CAGL0G10219g	AWP12	-2.61563	0.706386	0.163161	Adhesin-like protein with 5 tandem repeats; belongs to adhesin cluster VII; predicted GPI-anchor; similarity to S. cerevisiae flocculins, cell wall proteins that mediate adhesion
CAGL0K00715g	RTA1	-2.6352	0.21867	0.160963	Putative protein involved in 7-aminocholesterol resistance; gene is upregulated in azole-resistant strain
CAGL0K00170g	EPA22	-2.73493	0.572931	0.150211	Putative adhesin-like protein; belongs to adhesin cluster I
CAGL0J06402g		-2.83831	0.00601992	0.139825	Ortholog(s) have homocitrate synthase activity, role in DNA repair, histone displacement, lysine biosynthetic process via aminoadipic acid and nucleus localization
CAGL0H10626g	AWP13	-2.90716	0.340972	0.133308	Predicted cell wall adhesin with a role in adhesion; belongs to adhesin cluster III; predicted GPI anchor; contains tandem repeats
CAGL0B01166g	SWI6	-3.08999	0.0212715	0.117441	Ortholog(s) have DNA-binding transcription activator activity, RNA polymerase II-specific, RNA polymerase II proximal promoter sequence-specific DNA binding, transcription coactivator activity
CAGL0K08338g		-3.49448	0.360724	0.0887273	Protein of unknown function
CAGL0A02838g		-3.50205	0.316605	0.0882627	Ortholog(s) have DNA binding, G-quadruplex DNA binding, double-stranded telomeric DNA binding, protein binding, bridging, single-stranded telomeric DNA binding, telomeric DNA binding activity 2010-10-20
CAGL0G09339g		-3.73252	0.0186783	0.0752312	Ortholog(s) have xylulokinase activity and role in xylulose catabolic process
CAGL0C00110g	EPA6	-3.74541	0.103913	0.0745621	Sub-telomerically encoded adhesin with a role in cell adhesion; binds to ligands containing a terminal galactose residue; expressed during murine urinary tract infection, biofilm-upregulated; belongs to adhesin cluster I
CAGL0A01221g		-4.13556	0.244171	0.0568948	Has domain(s) with predicted channel activity, role in transmembrane transport and membrane localization
CAGL0J02508g	AWP1	-4.45829	0.673727	0.0454904	Adhesin-like protein; identified in cell wall extracts by mass spectrometry; belongs to adhesin cluster VI; predicted GPI anchor
CAGL0L05786g		-4.69763	0.12248	0.0385364	Has domain(s) with predicted nucleic acid binding, zinc ion binding activity
CAGL0K00110g	AWP2	-4.90592	0.385155	0.0333557	Putative adhesin; identified in cell wall extracts by mass spectrometry; belongs to adhesin cluster V; predicted GPI-anchor
CAGL0A02255g		-5.33846	0.553024	0.0247152	Protein of unknown function
CAGL0C01859g		-5.38569	0.102831	0.0239192	Has domain(s) with predicted integral component of membrane localization
CAGL0A02299g		-7.77388	0.800971	0.00456909	Protein of unknown function

## Sheet: TableS5
Table S5. Comparative transcriptomic profiling of C. glabrata FFUL674 isolate, in comparison with the reference strain CBS138. Cells of both strains were cultivated as detailed in materials and methods. Documented targets of CgPdr1 are highlighted in grey (for this it was selected among the activated genes those in which documented positive influence of CgPdr1 has been described, while in the dow…
ORF name	Gene name	Log2 FC (mRNA FFUL674/mRNA CBS138)	Std dev	mRNA FFUL674/mRNA CBS138	Function	Nr PDRE motifs
CAGL0J11550g		5.98439	0.594681	63.3111	Ortholog of S. cerevisiae YNL195C
CAGL0H04257g	MT-II	5.54938	2.4361	46.8305	Copper-binding metallothionein, involved in sequestration of metal ions; inducible by copper and silver; present in multiple (3-9) tandemly arranged copies in various strains; gene is downregulated in azole-resistant strain
CAGL0G05269g		5.23226	1.52178	37.5895	Putative mitochondrial protein; gene is downregulated in azole-resistant strain
CAGL0C03740g		5.01342	1.13826	32.299	Protein of unknown function
CAGL0F04631g		4.79155	2.84977	27.6949	Unknown
CAGL0A01826g	HXT5	4.7338	2.94081	26.6083	Ortholog(s) have glucose transmembrane transporter activity, role in glucose transmembrane transport and plasma membrane localization
CAGL0F08261g		4.21931	2.40316	18.6269	Ortholog(s) have high molecular weight kininogen binding, phosphopyruvate hydratase activity, protein-glutamine gamma-glutamyltransferase activity
CAGL0J04004g		4.04871	1.68	16.5494	Ortholog(s) have role in lipid homeostasis, mitochondrion organization and integral component of mitochondrial membrane, mitochondrial outer membrane localization
CAGL0H07469g		4.00677	1.29804	16.0753	Putative adhesin-like protein
CAGL0F08261g		3.92753	2.39906	15.2162	Ortholog(s) have high molecular weight kininogen binding, phosphopyruvate hydratase activity, protein-glutamine gamma-glutamyltransferase activity
CAGL0E05984g		3.63979	2.69467	12.4648	Ortholog of S. cerevisiae GRE1
CAGL0K10164g		3.63781	1.02294	12.4478	Predicted GPI-linked protein; putative adhesin-like protein	1
CAGL0J04202g	HSP12	3.63602	1.70397	12.4323	Heat shock protein; gene is upregulated in azole-resistant strain; expression upregulated in biofilm vs planktonic cell culture
CaglfMp10	ATP9	3.59855	0.976698	12.1135	Subunit c of the F0 sector of mitochondrial inner membrane F1-F0 ATP synthase, encoded on the mitochondrial genome
CAGL0J02024g		3.44623	3.48621	10.8998	Protein of unknown function
CaglfMp12	COX3	3.44431	2.01371	10.8853	Subunit III of cytochrome c oxidase, which is the terminal member of the mitochondrial inner membrane electron transport chain; one of three mitochondrially-encoded subunits
CAGL0J00451g		3.39327	1.28454	10.5069	Putative glyceraldehyde-3-phosphate dehydrogenase; protein differentially expressed in azole resistant strain; expression downregulated in biofilm vs planktonic cell culture
CAGL0G03289g	SSA3	3.26029	1.50774	9.58175	Heat shock protein of the HSP70 family
CAGL0M12947g	PUP1	3.20502	0.369751	9.22159	Mitochondria-localized protein; gene is upregulated in azole-resistant strain	2
CAGL0G03949g		3.17293	0.507036	9.01876	Protein of unknown function
CAGL0K07337g		3.16996	2.51596	9.00019	Has domain(s) with predicted ion channel activity, role in ion transport and membrane localization
CAGL0B02563g	GIN3	3.14158	0.684437	8.82489	Expressed protein of unknown function
CAGL0F07777g		3.08548	1.26622	8.48831	Putative aldehyde dehydrogenase; expression upregulated in biofilm vs planktonic cell culture
CAGL0L05434g	SUN4	3.03631	1.01392	8.2039	Ortholog(s) have role in fungal-type cell wall organization or biogenesis, mitochondrion organization and fungal-type cell wall localization
CAGL0F02717g	PDH1	3.00603	0.571146	8.0335	Multidrug transporter, predicted plasma membrane ATP-binding cassette (ABC) transporter; regulated by Pdr1p; involved in fluconazole resistance	2
CAGL0G05544g		2.94262	0.624448	7.68805	Ortholog(s) have role in cell morphogenesis involved in conjugation with cellular fusion and cell surface, fungal-type cell wall, mating projection localization
CAGL0H00418g		2.90101	2.56322	7.46948	Protein of unknown function
CAGL0H04939g		2.84222	2.33456	7.17122	Ortholog(s) have fructose 1,6-bisphosphate 1-phosphatase activity, role in gluconeogenesis, reactive oxygen species metabolic process and cytosol, periplasmic space localization	2
CAGL0F00869g		2.80938	1.16309	7.00983	Ortholog(s) have role in ascospore wall assembly and ascospore wall, prospore membrane localization	1
CAGL0M11902g		2.80846	1.63237	7.00535	Ortholog of S. cerevisiae : FUN19 and Saccharomyces cerevisiae S288C : YAL034C
CAGL0G04785g		2.8065	2.14847	6.99587	Protein of unknown function
CAGL0I01100g	GCY1	2.77305	1.99889	6.83551	Ortholog(s) have alditol:NADP+ 1-oxidoreductase activity, aldo-keto reductase (NADP) activity, glycerol dehydrogenase [NAD(P)+] activity, mRNA binding, oxidoreductase activity 2010-10-21
CAGL0G01738g		2.75542	0.916797	6.75251	Protein of unknown function
CAGL0H03971g		2.69182	1.31254	6.46126	Ortholog(s) have role in cellular response to oxidative stress, pathogenesis and cytoplasm, membrane raft, plasma membrane localization 2010-10-20	2
CAGL0K09372g		2.67003	0.741798	6.36443	Ortholog(s) have DNA-binding transcription repressor activity, RNA polymerase II-specific, RNA polymerase II proximal promoter sequence-specific DNA binding activity
CAGL0I05610g		2.62882	2.59725	6.18518	Ortholog of S. cerevisiae : YNR014W and Saccharomyces cerevisiae S288C : YNR014W	1
CAGL0K12518g		2.56124	1.59191	5.90215	Ortholog(s) have alanine-glyoxylate transaminase activity, role in glycine biosynthetic process, by transamination of glyoxylate and fungal biofilm matrix, mitochondrion localization
CAGL0A02002g		2.53393	1.93588	5.79149	Ortholog of S. cerevisiae : YOL024W and Saccharomyces cerevisiae S288C : YOL024W
CAGL0A01023g		2.45656	0.224715	5.48908	Ortholog(s) have nicotinamide-nucleotide adenylyltransferase activity and role in NAD biosynthetic process
CAGL0I07865g		2.44474	0.668466	5.44427	Ortholog(s) have role in pathogenesis and plasma membrane localization	1
CAGL0L05720g		2.39201	1.35755	5.2489	Ortholog(s) have membrane localization
CAGL0H01375g	SUR2	2.38964	1.89094	5.24027	Predicted sphinganine hydroxylase with role in sphingolipid biosynthesis; mutants show reduced sensitivity to caspofungin and increased sensitivity to micafungin
CAGL0H02101g		2.3814	1.11555	5.21041	Ortholog(s) have role in RNA metabolic process and fungal biofilm matrix localization	1
CAGL0C00649g	VMA2	2.34455	0.279452	5.079	Putative H1-ATPase V1 domain 60 KD subunit
CAGL0F07843g		2.32422	0.719422	5.00794	Ortholog(s) have dolichyl-phosphate-mannose-glycolipid alpha-mannosyltransferase activity and role in GPI anchor biosynthetic process
CAGL0M02915g		2.30738	1.37499	4.94985	Ortholog(s) have role in autophagy of peroxisome and peroxisome localization
CAGL0K05687g		2.30515	1.26607	4.9422	Has domain(s) with predicted FMN binding, catalytic activity, oxidoreductase activity and role in oxidation-reduction process
CAGL0I01166g	TRR1	2.30512	0.0849956	4.94209	Thioredoxin reductase (NADPH)
CAGL0D06578g		2.28592	0.705712	4.87675	Ortholog(s) have copper ion binding activity, role in metal ion transport, mitochondrial respiratory chain complex IV assembly and cytosol, mitochondrial intermembrane space localization
CAGL0C03872g	TIR3	2.28511	1.97213	4.87403	Putative GPI-linked cell wall protein involved in sterol uptake 2010-10-20
CAGL0D04026g		2.27557	1.62357	4.8419	Ortholog(s) have 4-aminobutyrate transaminase activity, pyridoxal phosphate binding activity and role in cellular amide catabolic process, gamma-aminobutyric acid catabolic process, glutamate metabolic process
CAGL0C04191g		2.25121	0.998299	4.76082	Ortholog(s) have succinate-semialdehyde dehydrogenase [NAD(P)+] activity, role in cellular response to oxidative stress, gamma-aminobutyric acid catabolic process, glutamate decarboxylation to succinate and mitochon localization
CAGL0M06655g		2.24771	0.755742	4.74929	Ortholog(s) have role in DNA methylation, cellular response to DNA damage stimulus, global genome nucleotide-excision repair, rRNA transcription and regulation of DNA methylation, more
CAGL0I00726g		2.24561	1.94647	4.74236	Ortholog(s) have role in ascospore wall assembly
CaglfMp11	COX2	2.21909	1.48201	4.65598	Subunit II of cytochrome c oxidase, which is the terminal member of the mitochondrial inner membrane electron transport chain; genomic sequence has a frameshift causing truncation of 25 codons relative to other yeast COX2 genes
CAGL0M01760g	CDR1	2.21564	1.36539	4.64489	Multidrug transporter of ATP-binding cassette (ABC) superfamily, involved in resistance to azoles; expression regulated by Pdr1p; increased abundance in azole resistant strains; expression increased by loss of the mitochondrial genome	5
CAGL0J03322g	FMP29	2.16977	0.467145	4.49951	Unknown
CAGL0K04235g		2.14395	1.69659	4.4197	Putative transaldolase	1
CAGL0H06633g		2.13194	1.03256	4.38307	Putative phosphoenolpyruvate carboxykinase; gene is downregulated in azole-resistant strain
CAGL0G04763g		2.12824	0.772049	4.37185	Has domain(s) with predicted role in termination of G protein-coupled receptor signaling pathway
CAGL0H08327g	TPI1	2.12787	1.17211	4.37072	Putative triose-phosphate isomerase; protein abundance decreased in ace2 mutant cells
CAGL0H02585g		2.11693	1.12563	4.3377	Ortholog(s) have glutamate decarboxylase activity and role in cellular response to oxidative stress, glutamate catabolic process
CAGL0I02530g		2.09157	1.11928	4.26211	Ortholog(s) have N,N-dimethylaniline monooxygenase activity, role in protein folding and endoplasmic reticulum membrane localization
CAGL0C02739g		2.07113	1.07499	4.20215	Ortholog(s) have role in mitochondrion organization, phospholipid homeostasis and integral component of mitochondrial outer membrane localization
CAGL0J01331g		2.06697	0.617566	4.19006	Unknown
CAGL0H08844g		2.01731	0.452848	4.04828	Putative adhesin-like protein	1
CAGL0A01716g		1.97971	0.764902	3.94413	Ortholog(s) have nicotinamidase activity and role in chromatin silencing at rDNA, chromatin silencing at telomere, negative regulation of DNA amplification, replicative cell aging
CAGL0K03459g		1.97915	1.57052	3.94262	Ortholog of S.cerevisiae SPG4
CAGL0I05390g		1.97182	1.29175	3.92264	Ortholog(s) have protein kinase activity, protein serine/threonine kinase activity
CAGL0C00275g	HSP31	1.96584	1.02059	3.90641	Putative cysteine protease; protein differentially expressed in azole resistant strain; gene is upregulated in azole-resistant strain	1
CAGL0F07117g		1.95589	1.56386	3.87955	Putative subunit of the heterotrimeric G protein; gene is upregulated in azole-resistant strain
CAGL0G02057g		1.94199	0.579366	3.84234	Ortholog of S. cerevisiae YKR075C
CAGL0E00341g	MTL1a	1.93374	1.44032	3.82045	Mating type protein a1; differentially spliced transcript; expressed in both MATa and MATalpha strains
CAGL0L06204g		1.92003	0.174953	3.78432	Ortholog(s) have cytochrome-c oxidase activity, enzyme regulator activity, role in aerobic respiration, mitochondrial respirasome assembly and mitochondrial respiratory chain complex IV, mitochondrion, plasma membrane localization
CAGL0D02134g		1.91851	1.05735	3.78033	Ortholog of S. cerevisiae YKL133C	1
CAGL0K09702g		1.91146	0.93738	3.7619	Putative stress-induced alcohol dehydrogenase; gene is upregulated in azole-resistant strain; protein differentially expressed in azole resistant strain	3
CAGL0C04323g		1.90747	1.50554	3.75151	Ortholog(s) have alpha,alpha-trehalase activity and role in trehalose catabolic process
CAGL0M04675g		1.90224	0.917429	3.73793	Ortholog(s) have thiosulfate sulfurtransferase activity	1
CAGL0B02497g		1.89549	0.558081	3.72048	Ortholog(s) have structural constituent of cytoskeleton activity, role in microtubule polymerization, nuclear division, nuclear migration by microtubule mediated pushing forces and cytoplasmic microtubule, tubulin complex localization
CAGL0E04356g		1.84094	0.740893	3.58242	Ortholog(s) have manganese ion binding, superoxide dismutase activity	1
CAGL0I01122g	GRE3	1.83465	1.04263	3.56685	Ortholog(s) have D-xylose:NADP reductase activity, NADPH binding, alditol:NADP+ 1-oxidoreductase activity, mRNA binding activity
CAGL0M12793g		1.83387	1.07449	3.56492	Protein of unknown function
CAGL0M12551g		1.82773	0.884734	3.54977	Ortholog(s) have role in energy reserve metabolic process
CAGL0K02629g		1.82187	1.18656	3.53538	Has domain(s) with predicted oxidoreductase activity, transferase activity, transferring acyl groups other than amino-acyl groups, zinc ion binding activity and role in oxidation-reduction process
CAGL0D02640g		1.81217	0.589125	3.5117	Has domain(s) with predicted transmembrane transporter activity, role in transmembrane transport and integral component of membrane, membrane localization
CAGL0G05698g	GDH2	1.81157	0.902273	3.51025	Ortholog(s) have glutamate dehydrogenase (NAD+) activity and role in nitrogen compound metabolic process
CAGL0L04378g		1.8095	0.434923	3.50522	Unknown
CAGL0L08110g		1.79726	0.800516	3.47561	Has domain(s) with predicted structural constituent of ribosome activity, role in translation and ribosome localization
CAGL0D05082g		1.78712	0.43108	3.45124	Protein of unknown function
CAGL0L10362g		1.7739	0.793278	3.41977	Ortholog of S. cerevisiae YOR062C
CAGL0A00341g		1.76311	1.0523	3.3943	Ortholog(s) have role in sphingoid catabolic process
CAGL0L12012g		1.75547	0.902229	3.37636	Ortholog(s) have trans-aconitate 3-methyltransferase activity and cytosol localization
CAGL0A02321g	HXT3	1.75145	1.26771	3.36697	Ortholog(s) have fructose transmembrane transporter activity, glucose transmembrane transporter activity, mannose transmembrane transporter activity
CAGL0G02849g		1.73589	0.792827	3.33085	Ortholog(s) have endoplasmic reticulum, nuclear envelope localization
CAGL0F04807g		1.72731	0.904875	3.31109	Ortholog(s) have role in pathogenesis and cell surface, hyphal cell wall, integral component of mitochondrial outer membrane, membrane, mitochondrial outer membrane, mitochondrion, plasma membrane localization
CAGL0G08624g	QDR2	1.72015	0.821765	3.29471	Drug:H+ antiporter of the Major Facilitator Superfamily, confers imidazole drug resistance, involved in quinidine/multidrug efflux; gene is activated by Pdr1p; upregulated in azole-resistant strain	1
CAGL0A04521g		1.70799	0.43997	3.26706	Ortholog(s) have structural constituent of ribosome activity, role in maturation of SSU-rRNA from tricistronic rRNA transcript (SSU-rRNA, 5.8S rRNA, LSU-rRNA) and cytosolic small ribosomal subunit localization
CAGL0K06105g		1.7054	0.77883	3.26119	Ortholog of S. cerevisiae BOP2
CAGL0E01881g	YPS11	1.67695	0.481244	3.19751	Putative aspartic protease; member of a YPS gene cluster that is required for virulence in mice; induced in response to low pH and high temperature
CAGL0K06567g		1.67659	0.30255	3.19672	Ortholog(s) have preribosome, large subunit precursor localization
CAGL0D03894g	PRO1	1.66558	1.08551	3.17242	Putative gamma-glutamyl phosphate reductase
CAGL0A01606g		1.65319	0.65437	3.14529	Ortholog(s) have double-stranded DNA binding activity, role in reciprocal meiotic recombination, synapsis and condensed nuclear chromosome localization
CAGL0H10076g		1.65195	0.93162	3.14258	Ortholog(s) have plasma membrane localization	2
CAGL0I04180g	AMT1	1.64489	0.86272	3.12724	Metal-activated transcription factor; binds promoters of metallothionein genes; autoregulates its own expression; gene is downregulated in azole-resistant strain
CAGL0M00330g	HOM6	1.63992	0.468372	3.11649	Ortholog(s) have homoserine dehydrogenase activity and role in homoserine biosynthetic process, methionine biosynthetic process, threonine biosynthetic process
CAGL0B03465g		1.6244	0.721135	3.08315	Ortholog(s) have role in ethanol metabolic process and mitochondrial inner membrane localization
CAGL0E05632g		1.59651	0.567111	3.02412	Ortholog(s) have L-proline transmembrane transporter activity, neutral amino acid transmembrane transporter activity and role in gamma-aminobutyric acid transport, neutral amino acid transport, proline transport
CAGL0L10582g		1.59343	0.773458	3.01767	Has domain(s) with predicted mannosyl-oligosaccharide glucosidase activity and role in oligosaccharide metabolic process
CAGL0M08426g		1.58465	0.433145	2.99936	Putative protein; contains an ARS in its promoter; gene is upregulated in azole-resistant strain
CAGL0M14091g		1.58089	0.349881	2.99155	Putative quinone reductase/NADPH dehydrogenase; gene is upregulated in azole-resistant strain	1
CAGL0I00286g		1.57786	0.469384	2.98527	Has domain(s) with predicted transmembrane transporter activity, role in transmembrane transport and integral component of membrane, membrane localization
CAGL0A04081g		1.5519	0.268748	2.93203	Predicted GPI-linked cell wall protein
CAGL0F08085g		1.55035	0.717801	2.92889	Ortholog(s) have pyruvate transmembrane transporter activity, role in mitochondrial pyruvate transmembrane transport and mitochondrial membrane, plasma membrane localization
CAGL0H07535g		1.54284	0.325165	2.91368	Ortholog(s) have RNA polymerase II complex binding, cyclin-dependent protein kinase activity, cyclin-dependent protein serine/threonine kinase activity, histone binding, protein kinase activity, protein serine/threonine kinase activity
CAGL0H04543g		1.51867	0.556214	2.86528	Ortholog(s) have role in endoplasmic reticulum membrane organization, phospholipid biosynthetic process, regulation of phosphatidylinositol dephosphorylation
CAGL0M12474g		1.50965	0.347315	2.84741	Ortholog of S. cerevisiae YIL055C
CAGL0B01100g		1.49603	0.493949	2.82065	Phosphatidylethanolamine-binding protein	1
CAGL0K02079g	GLC7	1.49449	0.59439	2.81765	Putative serine-threonine phosphoprotein phosphatase 1, catalytic chain
CAGL0G02101g	ECM4	1.4809	0.61956	2.79123	Putative omega class glutathione transferase; gene is downregulated in azole-resistant strain
CAGL0M08514g	PIR5	1.47748	0.455936	2.78461	Pir protein family member, putative cell wall component
CAGL0G05764g		1.46672	0.648649	2.76394	Has domain(s) with predicted GTP binding, GTPase activity and role in intracellular protein transport, nucleocytoplasmic transport, protein transport, signal transduction, small GTPase mediated signal transduction
CAGL0H10120g		1.45391	0.580858	2.7395	Ortholog(s) have glucan endo-1,6-beta-glucosidase activity and role in fungal-type cell wall beta-glucan metabolic process, fungal-type cell wall disassembly involved in conjugation with cellular fusion	1
CAGL0H10362g		1.44188	0.547752	2.71675	Ortholog(s) have protein binding, bridging activity and role in proteasome regulatory particle assembly
CAGL0K04939g		1.44116	0.548302	2.71539	Ortholog(s) have endopolyphosphatase activity, role in polyphosphate catabolic process and fungal-type vacuole, vacuolar lumen localization
CAGL0L02123g	SNF5	-1.37837	0.249396	0.384652	Ortholog(s) have DNA translocase activity, RNA polymerase II activating transcription factor binding activity
CAGL0K01397g	FMNAT	-1.39111	0.325562	0.38127	Flavin mononucleotide adenylyltransferase (FMNAT); catalyzes the formation of the essential flavocoenzyme flavin adenine dinucleotide (FAD) and plays an important role in flavocoenzyme homeostasis regulation
CAGL0M00154g	CYN1	-1.42762	0.480176	0.371744	Plasma membrane high affinity cystine specific transporter; present only in pathogenic yeasts; confers the ability to utilize cystine as a sulfur source
CAGL0K01001g		-1.43684	0.280971	0.369377	Ortholog(s) have role in protein localization to plasma membrane, protein targeting to vacuole, receptor-mediated endocytosis, response to pheromone and actin cortical patch, cytosol, endosome, plasma membrane localization
CAGL0C01837g	RER1	-1.43969	0.274022	0.368646	Has domain(s) with predicted integral component of membrane localization
CAGL0M04873g		-1.44674	0.570327	0.36685	Ortholog(s) have role in rRNA export from nucleus and cell surface localization
CAGL0M01474g		-1.45262	0.102112	0.365358	Ortholog(s) have TBP-class protein binding, chromatin binding, core promoter binding, sequence-specific DNA binding, transcription coactivator activity, transcription corepressor activity
CAGL0K06963g	ROT2	-1.45348	0.213614	0.36514	Ortholog(s) have glucan 1,3-alpha-glucosidase activity
CAGL0M00880g	CAR2	-1.49659	0.472913	0.35439	Putative ornithine aminotransferase; protein abundance increased in ace2 mutant cells
CAGL0K12056g		-1.49917	0.581371	0.353756	Ortholog(s) have structural constituent of ribosome activity and mitochondrial ribosome, mitochondrial small ribosomal subunit localization
CAGL0K12826g		-1.50142	0.413949	0.353205	Has domain(s) with predicted structural constituent of ribosome activity, role in translation and ribosome localization
CAGL0M10659g		-1.50856	0.188049	0.351462	Ortholog(s) have DNA translocase activity and role in positive regulation of transcription by RNA polymerase II, positive regulation of transcription from RNA polymerase II promoter in response to amino acid starvation
CAGL0K01045g		-1.51145	0.698197	0.350758	Ortholog(s) have enzyme regulator activity, guanyl-nucleotide exchange factor activity, translation initiation factor activity and role in cytoplasmic translational initiation, regulation of translational initiation
CAGL0K00649g		-1.52324	0.472324	0.347904	Ortholog(s) have role in endoplasmic reticulum to Golgi vesicle-mediated transport and endoplasmic reticulum, integral component of membrane localization
CAGL0D01562g	FCY1	-1.53547	0.679448	0.344968	Ortholog(s) have cytosine deaminase activity and role in cytidine metabolic process, cytosine metabolic process, pyrimidine-containing compound salvage
CAGL0J09086g		-1.55153	0.750799	0.341147	Ortholog(s) have role in maturation of LSU-rRNA from tricistronic rRNA transcript (SSU-rRNA, 5.8S rRNA, LSU-rRNA) and cytosolic large ribosomal subunit, preribosome, large subunit precursor localization
CAGL0F08019g	PEX21	-1.5731	0.203633	0.336086	Ortholog(s) have role in positive regulation of binding, protein import into peroxisome matrix and cytosol, peroxisome localization
CAGL0D04246g		-1.57494	0.202965	0.335656	Ortholog(s) have role in late endosome to vacuole transport, protein transport to vacuole involved in ubiquitin-dependent protein catabolic process via the multivesicular body sorting pathway
CAGL0K00319g		-1.58253	0.443188	0.333896	Ortholog(s) have ATP binding, magnesium ion binding, ubiquitin activating enzyme activity, role in protein ubiquitination and cytoplasm, nucleus localization
CAGL0K00913g		-1.60416	0.296358	0.328927	Ortholog(s) have formate-tetrahydrofolate ligase activity, methenyltetrahydrofolate cyclohydrolase activity, methylenetetrahydrofolate dehydrogenase (NADP+) activity, single-stranded DNA binding activity
CAGL0I03212g		-1.60681	0.302055	0.328324	Ortholog of S. cerevisiae YEL025C
CAGL0B02882g	BMT2	-1.62063	0.70893	0.325194	Beta mannosyltransferase; transmembrane domain protein similar to C. albicans WRY family; gene is downregulated in azole-resistant strain
CAGL0H00847g		-1.62397	0.373324	0.324441	Ortholog(s) have UDP-galactose transmembrane transporter activity and role in UDP-galactose transmembrane transport, UDP-glucose transmembrane transport
CAGL0K07942g		-1.62893	0.338371	0.323329	Protein of unknown function
CAGL0F01749g		-1.63566	0.569887	0.321822	Putative serine hydroxymethyltransferase; protein differentially expressed in azole resistant strain
CAGL0C00253g		-1.6395	0.466577	0.320967	Putative cell wall adhesin; belongs to adhesin cluster III; predicted GPI anchor; contains 6 tandem repeats
CAGL0M06303g		-1.64819	0.764881	0.319039	Ortholog(s) have structural constituent of ribosome activity, role in maturation of SSU-rRNA from tricistronic rRNA transcript (SSU-rRNA, 5.8S rRNA, LSU-rRNA) and cytosolic small ribosomal subunit, small-subunit processome localization
CAGL0J07062g		-1.65942	0.470937	0.316566	Ortholog(s) have arginase activity, manganese ion binding, ornithine carbamoyltransferase inhibitor activity, zinc ion binding activity
CAGL0K00627g		-1.66063	0.241958	0.3163	Ortholog of S. cerevisiae YJL193W
CAGL0M12408g		-1.66385	0.755669	0.315596	Ortholog(s) have cytosolic large ribosomal subunit localization
CAGL0K00825g		-1.67072	0.0995579	0.314097	Has domain(s) with predicted phosphatase activity, phosphoserine phosphatase activity and role in L-serine biosynthetic process, metabolic process
CAGL0K06149g		-1.68097	0.820143	0.311874	Ortholog(s) have role in ribosomal small subunit assembly
CAGL0K01419g		-1.74802	0.904715	0.297711	Ortholog(s) have RNA binding activity, role in mRNA processing, mitochondrial translation and mitochondrion localization
CAGL0L06886g		-1.79275	1.08214	0.288622	Ortholog(s) have cell surface, cytosolic large ribosomal subunit localization
CAGL0L00429g		-1.80177	0.35635	0.286822	Ortholog(s) have glycine dehydrogenase (decarboxylating) activity and role in glycine decarboxylation via glycine cleavage system, one-carbon metabolic process
CAGL0A03278g		-1.85098	1.15793	0.277205	Has domain(s) with predicted structural constituent of ribosome activity, role in translation and ribosome localization
CAGL0M00814g		-1.85549	0.989337	0.27634	Ortholog(s) have role in maturation of SSU-rRNA from tricistronic rRNA transcript (SSU-rRNA, 5.8S rRNA, LSU-rRNA) and extracellular region localization 2010-10-21
CAGL0J03234g		-1.8615	0.973998	0.27519	Ortholog(s) have role in maturation of SSU-rRNA from tricistronic rRNA transcript (SSU-rRNA, 5.8S rRNA, LSU-rRNA)
CAGL0K01441g		-1.90218	0.806855	0.267539	Ortholog(s) have RNA binding activity, role in spliceosomal complex assembly and U2-type prespliceosome localization
CAGL0K00957g		-1.92282	1.02716	0.263738	Ortholog(s) have microtubule binding activity, role in protein urmylation, regulation of transcription by RNA polymerase II, tRNA wobble uridine modification and Elongator holoenzyme complex, cytoplasm, nucleus localization
CAGL0E00187g		-1.9251	0.867071	0.263323	Putative adhesin-like protein; belongs to adhesin cluster IV
CAGL0J06402g		-1.96571	0.906041	0.256013	Ortholog(s) have homocitrate synthase activity, role in DNA repair, histone displacement, lysine biosynthetic process via aminoadipic acid and nucleus localization
CAGL0L01419g		-2.01325	0.695251	0.247715	Ortholog(s) have ATPase activity, coupled to transmembrane movement of ions, phosphorylative mechanism, calcium-transporting ATPase activity
CAGL0C00231g		-2.03397	0.236471	0.244182	Has domain(s) with predicted nucleobase transmembrane transporter activity, role in nucleobase transport, transmembrane transport and membrane localization
CAGL0C04499g		-2.03799	0.0974153	0.243503	Ortholog(s) have MAP kinase serine/threonine phosphatase activity, magnesium-dependent protein serine/threonine phosphatase activity, protein serine/threonine phosphatase activity
CAGL0K00605g		-2.06741	0.91244	0.238587	Ortholog(s) have ATP binding, ATPase activity, DNA replication origin binding, GTP binding, GTPase activity, chromatin binding, protein serine/threonine kinase activity
CAGL0K10906g		-2.10408	1.20193	0.2326	Ortholog(s) have RNA binding, structural constituent of ribosome activity, role in cytoplasmic translation and cytosolic large ribosomal subunit localization
CAGL0E05236g		-2.12354	0.574415	0.229483	Protein of unknown function
CAGL0M05533g	DUR1,2	-2.16444	0.502886	0.223069	Ortholog(s) have role in nitrogen compound metabolic process
CAGL0K00715g	RTA1	-2.30521	1.19037	0.202331	Putative protein involved in 7-aminocholesterol resistance; gene is upregulated in azole-resistant strain
CAGL0H06853g	ADH6	-2.30943	1.36558	0.201739	Putative NADP-dependent alcohol dehydrogenase VI; protein abundance increased in ace2 mutant cells
CAGL0K00110g	AWP2	-2.31476	0.038391	0.200996	Putative adhesin; identified in cell wall extracts by mass spectrometry; belongs to adhesin cluster V; predicted GPI-anchor
CAGL0K00759g	ZPR1	-2.36001	1.363	0.19479	Protein with similarity to M. musculus zinc finger protein Zpr1p
CAGL0L03267g	GAP1	-2.62154	0.707522	0.162494	Ortholog(s) have L-proline transmembrane transporter activity, amino acid transmembrane transporter activity, beta-alanine transmembrane transporter activity, polyamine transmembrane transporter activity
CAGL0J06028g	MEP2	-2.77013	0.765624	0.146591	Ortholog(s) have ammonium transmembrane transporter activity, high-affinity secondary active ammonium transmembrane transporter activity
CAGL0M01606g		-2.9543	0.356831	0.129023	Ortholog(s) have SUMO activating enzyme activity, role in protein sumoylation and SUMO activating enzyme complex, nucleus localization
CAGL0L05786g		-3.1495	1.30108	0.112695	Has domain(s) with predicted nucleic acid binding, zinc ion binding activity
CAGL0B01166g	SWI6	-3.18575	0.175844	0.109899	Ortholog(s) have DNA-binding transcription activator activity, RNA polymerase II-specific, RNA polymerase II proximal promoter sequence-specific DNA binding, transcription coactivator activity
CAGL0A02255g		-3.18632	0.220246	0.109856	Protein of unknown function
CAGL0C00110g	EPA6	-3.44039	0.412757	0.0921171	Sub-telomerically encoded adhesin with a role in cell adhesion; binds to ligands containing a terminal galactose residue; expressed during murine urinary tract infection, biofilm-upregulated; belongs to adhesin cluster I
CAGL0K03157g	DUR31	-3.50657	1.03892	0.0879867	Putative plasma membrane polyamine transporter
CAGL0C01859g		-3.52321	0.558453	0.0869776	Has domain(s) with predicted integral component of membrane localization
CAGL0A02299g		-5.31578	0.358571	0.0251068	Protein of unknown function

## Sheet: Table S6
Table S6. Comparative transcriptomic profiling of C. glabrata FFUL443 isolate, in comparison with the reference strain CBS138, after 2h of exposure to 32 mg/L of fluconazole. Cells of both strains were cultivated as detailed in materials and methods. Documented targets of CgPdr1 are highlighted in grey (for this it was selected among the activated genes those in which documented positive influenc…
ORF name	Gene name	Log2 FC (mRNA FFUL443/mRNA CBS138)	Std dev	mRNA FFUL443/mRNA CBS138	Function	Nr PDRE motifs
CAGL0J11550g		5.58551	0.232747	48.0182	Unknown function; Ortholog of Sc YNL195C
CAGL0M06963g	SOL2	5.29083	0.10893	39.147	Ortholog(s) have role in tRNA export from nucleus and cytosol localization
CAGL0C03740g		4.41557	0.214138	21.3412	Unknown function
CAGL0H07469g		3.90983	0.0883015	15.0306	Unknown function
CAGL0K07337g		3.50682	0.660737	11.3673	Has domain(s) with predicted ion channel activity; ortholog of Sc Hsp30
CAGL0E05984g		3.43736	1.00357	10.833	Unknown function; Ortholog of Sc GRE1
CAGL0D03894g	PRO1	3.37778	0.055242	10.3948	Putative gamma-glutamyl phosphate reductase
CAGL0F07953g		3.2	0.67	9.21	Unknown function; Ortholog of Sc SPG1
CAGL0K05687g		3.16928	0.12088	8.99601	Has domain(s) with predicted FMN binding, catalytic activity, oxidoreductase activity
CAGL0F07777g	ALD5	3.16593	0.273148	8.97508	Putative aldehyde dehydrogenase
CAGL0L04378g		3.12782	0.354375	8.74114	Has domain(s) with predicted transmembrane transporter activity
CAGL0L05434g	SUN4	3.08953	0.000860302	8.51221	Ortholog(s) have role in fungal-type cell wall organization or biogenesis, mitochondrial ATP synthesis coupled proton transport and fungal-type cell wall localization
CAGL0A02002g		3.08098	0.588869	8.46189	Unknown function; Ortholog of Sc YOL024W
CAGL0F04631g		3.07304	0.25112	8.41544	Unknown function; Ortholog of Sc MOH1
CAGL0I05610g		2.92763	0.284189	7.60861	Unknown function; Ortholog of Sc YNR014W	1
CAGL0L13299g	EPA11	2.81843	0.501324	7.05395	Putative adhesin
CAGL0A01826g	HXT5	2.80509	0.879615	6.98904	Ortholog(s) have glucose transmembrane transporter activity
CAGL0B01012g		2.66995	0.21	6.36406	Ortholog(s) have L-proline transmembrane transporter activity; ortholog of Sc Agp1
CAGL0I07865g		2.63479	0.449775	6.21085	Unknown function	1
CAGL0D02640g		2.60068	0.00129155	6.06571	role in transmembrane transport, ortholog of Sc Hxt2
CAGL0G10175g	AWP6	2.59	0.97	6.03	Predicted adhesin
CAGL0B02563g	GIN3	2.51607	0.197165	5.72021	Unknown function
CAGL0H00528g		2.51408	0.249907	5.71234	Ortholog(s) have histone H3-methyl-lysine-4 demethylase activity
CAGL0A02321g	HXT3	2.45184	0.530557	5.47112	Ortholog(s) have fructose transmembrane transporter activity
CAGL0J04004g		2.44004	0.834544	5.42656	Ortholog(s) have role in lipid homeostasis
CAGL0K03421g		2.41403	0.684858	5.32962	Ortholog(s) have phosphoglucomutase activity
CAGL0F02717g	PDH1	2.40677	0.512745	5.30285	Multidrug transporter, predicted plasma membrane ATP-binding cassette (ABC) transporter	5
CAGL0F00649g		2.37445	0.0497508	5.18538	Has domain(s) with predicted ATP binding, protein kinase activity
CAGL0G05544g		2.33182	0.597317	5.0344	Ortholog(s) have role in cell morphogenesis involved in conjugation with cellular fusion and mating projection localization
CAGL0M14069g	PWP6	2.30558	0.0591029	4.94366	Putative adhesin	1
CAGL0J00451g	TDH3	2.25783	0.657077	4.7827	Putative glyceraldehyde-3-phosphate dehydrogenase
CAGL0E05632g		2.18414	0.15067	4.54457	Ortholog(s) have L-proline transmembrane transporter activity
CAGL0G02563g		2.18	0.09	4.52	Has domain(s) with predicted thiol-dependent deubiquitinase activity
CAGL0E01815g	YPS8	2.16214	0.339883	4.47579	Putative aspartic protease
CAGL0G05984g		2.16	0.27	4.46	Ortholog(s) have role in ascospore wall assembly
CAGL0L12254g_repl		2.14	0.43	4.42	Ortholog(s) have L-alanine:2-oxoglutarate aminotransferase activity, role in alanine biosynthetic process; ortholog of Sc Alt1
CAGL0L13288g		2.09187	0.35853	4.263	Unknown function
CAGL0F08261g		2.05203	0.0612092	4.1469	Ortholog(s) have melatonin binding, phosphopyruvate hydratase activity
CAGL0A02145g		2.04	0	4.1	Ortholog(s) have actin filament binding activity, ro
CAGL0L11770g		2.02	0.14	4.07	Ortholog(s) have ATP-dependent activity, acting on DNA, DNA binding, chromatin DNA binding
CAGL0G03289g	SSA3	2.01601	0.660811	4.04465	Heat shock protein of the HSP70 family
CAGL0I09702g		1.99	0.11	3.97	Ortholog(s) have riboflavin transmembrane transporter activity, role in riboflavin transport and plasma membrane localization; orthologue of Sc Mch5
CAGL0G04433g		1.96159	0.104855	3.8949	Unknown function; Ortholog of Sc PRM10
CAGL0H10076g		1.89	0.815	3.7	Ortholog(s) have plasma membrane localization	2
CAGL0K05247g		1.95505	0.0141484	3.87729	Ortholog(s) have ubiquitin protein ligase binding activity
CAGL0K04301g		1.95	0.21	3.87	Putative mitochondrial Ser/Thr protein kinase
CAGL0F01419g	AUS1	1.95209	0.366146	3.86936	ATP-binding cassette transporter involved in sterol uptake
CAGL0J01331g		1.94253	0.325397	3.84379	Unknown function; Ortholog of Sc YMR090W
CAGL0L09273g		1.94021	0.625796	3.83762	Ortholog(s) have isocitrate lyase activity
CAGL0A04829g		1.93719	0.0281044	3.82958	Putative hexokinase isoenzyme 2
CAGL0G02937g		1.93366	0.0364873	3.82024	Ortholog(s) have pyruvate decarboxylase activity and role in L-phenylalanine catabolic process
CAGL0B01595g		1.92918	0.244772	3.80839	Unknown function
CAGL0K03157g	DUR31	1.924	0.145268	3.79475	Putative plasma membrane polyamine transporter
CAGL0L04664g	HEM15	1.92	0.01	3.78	Ortholog(s) have 2 iron, 2 sulfur cluster binding, ferrochelatase activity, role in heme biosynthetic process
CAGL0M12793g		1.88851	0.298711	3.70253	Unknown function
CAGL0K07634g	GAT1	1.88475	0.105226	3.6929	Ortholog(s) have DNA-binding transcription activator activity
CAGL0E01529g		1.87	0.55	3.66	Ortholog(s) have role in fructose 2,6-bisphosphate metabolic process; orthologue of Sc Pfk27
CAGL0D06600g		1.86	0.14	3.63	Ortholog(s) have protein serine/threonine kinase activity, protein tyrosine kinase activity
CAGL0M05445g		1.85993	0.567399	3.62989	Ortholog(s) have role in signal transduction
CAGL0J09966g	YDJ1	1.85	1.23	3.61	Putative mitochondrial and ER import protein
CAGL0M04499g		1.84397	0.62405	3.58996	Ortholog(s) have proline dehydrogenase activity
CAGL0G04785g		1.83725	0.0912888	3.57327	Unknown function
CAGL0L05192g		1.83	0.97	3.56	Unknown function
CAGL0G01122g		1.82223	0.141261	3.53627	Unknown function	5
CAGL0F08085g		1.81863	0.015059	3.52747	Ortholog(s) have pyruvate transmembrane transporter activity
CAGL0M06325g		1.82	0.06	3.52	Ortholog(s) have DNA binding, bending, sequence-specific DNA binding activity
CAGL0G02057g		1.81	0.29	3.51	Unknown function; Ortholog of Sc YKR075C
CAGL0M11902g		1.78609	0.527686	3.44879	Unknown function; Ortholog of Sc FUN19
CAGL0M13365g		1.76326	0.0690557	3.39465	Ortholog(s) have role in ascospore wall assembly,
CAGL0A02211g	HXT6/7	1.76	0.03	3.38	Ortholog(s) have glucose transmembrane transporter activity
CAGL0K10868g	CTA1	1.75374	0.671524	3.37231	Putative catalase A
CAGL0G01716g		1.75	0.01	3.37	Has domain(s) with predicted ATP binding,
CAGL0G05566g		1.74	0.54	3.35	Ortholog(s) have role in ascospore formation, fungal-type cell wall organization and cell cortex
CAGL0D02134g		1.73987	0.120157	3.34005	Unknown function; Ortholog of Sc YKL133C	1
CAGL0B00836g		1.74	0.03	3.34	Ortholog(s) have peptide-methionine (R)-S-oxide reductase activity
CAGL0M13167g		1.73	0.07	3.32	Ortholog(s) have protein serine/threonine kinase activity
CAGL0G05269g		1.72157	0.608018	3.29795	Putative mitochondrial protein
CAGL0A01760g		1.72	0.04	3.29	Ortholog(s) have arginine-tRNA ligase activity and role in arginyl-tRNA aminoacylation
CAGL0K04631g		1.71653	0.607547	3.28645	Has domain(s) with predicted nucleic acid binding
CAGL0G02453g		1.71	0.04	3.28	Ortholog(s) have dipeptide transmembrane transporter activity
CAGL0A01782g	HXT4	1.72	0.2	3.28	Ortholog(s) have glucose transmembrane transporter activity
CAGL0F00869g		1.71359	0.437619	3.27976	Ortholog(s) have role in ascospore wall assembly and ascospore wall	1
CAGL0J03080g		1.71306	0.421504	3.27857	Ortholog(s) have role in energy reserve metabolic process and cell periphery localization
CAGL0J04202g	HSP12	1.71135	0.450433	3.27468	Heat shock protein	2
CAGL0I09086g		1.7086	0.167338	3.26843	Has domain(s) with predicted transmembrane transporter activity
CAGL0D04026g		1.7	0.47	3.26	Ortholog(s) have 4-aminobutyrate transaminase activity; ortholog of Sc Uga1
CAGL0J08294g		1.7	0.02	3.25	Ortholog(s) have borate efflux transmembrane transporter activity
CAGL0L03696g		1.70033	0.00311592	3.24974	Has domain(s) with predicted role in transmembrane transport
CAGL0I10098g	PWP7	1.69	0.59	3.23	Cell wall protein that mediates adhesion to endothelial cells
CAGL0F01111g		1.69084	0.259974	3.22845	Ortholog(s) have role in inositol metabolic process
CAGL0G05720g		1.68	0	3.21	Ortholog(s) have role in negative regulation of conjugation with cellular fusion, negative regulation of transcription from RNA polymerase II promoter by pheromones
CAGL0M02915g		1.67238	0.65612	3.18739	Ortholog(s) have role in autophagy of peroxisome
CAGL0L10142g	RSB1	1.67	0.81	3.18	Putative sphingolipid flippase
CAGL0B04235g		1.66	0.56	3.16	Protein with a predicted role in maintenance of ploidy
CAGL0M13101g		1.66	0.64	3.15	Unknown function
CAGL0F06325g		1.65159	0.0207075	3.1418	Ortholog(s) have Sin3-type complex localization	1
CAGL0B03311g		1.64038	0.209511	3.11748	Ortholog(s) have ubiquitin-protein transferase activity
CAGL0L07106g		1.64	0.02	3.11	Ortholog(s) have protein farnesyltransferase activity, role in protein farnesylation and protein farnesyltransferase complex localization
CAGL0F04917g		1.64	0.47	3.11	Putative regulatory subunit for protein phosphatase
CAGL0H02101g		1.62171	0.480205	3.07739	Ortholog(s) have role in RNA metabolic process	1
CAGL0K02519g		1.61919	0.0823686	3.07203	Unknown function
CAGL0M03377g		1.61774	0.409578	3.06895	Ortholog(s) have 1,4-alpha-glucan branching enzyme activity and role in glycogen biosynthetic process
CAGL0H00418g		1.59578	0.596324	3.02257	Unknown function
CAGL0J04290g		1.59	0.14	3.02	Ortholog(s) have MAP kinase activity
CAGL0M10285g		1.59326	0.0632662	3.0173	Ortholog(s) have chromatin binding
CAGL0A03102g	ARO10	1.58483	1.23875	2.99973	Ortholog(s) have carboxy-lyase activity
CAGL0M13189g	MSN4	1.58133	0.0682679	2.99246	Putative transcription factor similar to S. cerevisiae Msn4p
CAGL0C03872g	TIR3	1.58098	0.55293	2.99174	Putative GPI-linked cell wall protein involved in sterol uptake
CAGL0J06050g		1.58	0.59	2.99	Ortholog(s) have role in cell wall assembly and extracellular region localization; orthologue of Sc Ygp1
CAGL0A01089g		1.57717	0.252193	2.98384	Has domain(s) with predicted alcohol O-acetyltransferase activity
CAGL0L01925g	UGP1	1.55	0.61	2.94	Putative UDP-glucose pyrophosphorylase
CAGL0I05390g		1.55	0.04	2.93	Ortholog(s) have protein kinase activity, protein serine/threonine kinase activity
CAGL0F07865g	UPC2B	1.54824	0.457212	2.9246	Putative Zn(2)-Cys(6) binuclear cluster transcriptional regulator of ergosterol biosynthesis
CAGL0G05335g	TPS2	1.54264	0.218029	2.91328	Ortholog(s) have trehalose-phosphatase activity	1
CAGL0G01738g		1.53967	0.0786702	2.90728	Unknown function
CAGL0F01485g	TIR2	1.54	0.02	2.9	Putative GPI-linked cell wall mannoprotein
CAGL0B03465g		1.53605	0.19302	2.89998	Ortholog(s) have role in ethanol metabolic process
CAGL0E06380g		1.53343	0.311666	2.89473	Ortholog(s) have ATP-dependent NAD(P)H-hydrate dehydratase activity
CAGL0E00341g	MTL1a	1.53242	0.370899	2.89272	Mating type protein a1
CAGL0C04587g		1.51124	0.575693	2.85056	Unknown function; Ortholog of Sc YJR098C
CAGL0L04598g		1.51	0.67	2.84	Ortholog(s) have RNA 7-methylguanosine cap binding
CAGL0D06578g		1.51	0.5	2.84	Ortholog(s) have copper ion binding activity; ortholog of Sc Cox19
CAGL0L07766g		1.5	0.01	2.83	Ortholog(s) have acetate transmembrane transporter activity, ammonium transmembrane transporter activity; ortholog of Sc Ady2
CAGL0M12276g		1.49	0.07	2.8	Ortholog(s) have GTPase activity, calcium ion binding activity and role in mitochondrion inheritance
CAGL0D00198g		1.48215	0.0187205	2.79365	Ortholog(s) have (R,R)-butanediol dehydrogenase activity
CAGL0G05742g		1.48	0.29	2.79	Ortholog(s) have rRNA binding, snoRNA binding activity, role in ribosomal small subunit biogenesis and 90S preribosome, nucleolus localization
CAGL0M03025g	ZCF41	1.47674	0.0114253	2.78319	Ortholog(s) have DNA-binding transcription activator activity
CAGL0L07700g		1.47	0.07	2.77	Ortholog(s) have DNA-directed DNA polymerase activity
CAGL0H09592g		1.46216	0.0130522	2.7552	Putative GPI-linked cell wall protein
CAGL0H09614g	TIR1	1.45982	0.00384902	2.75075	Putative GPI-linked cell wall protein
CAGL0A01023g		1.46	0.08	2.75	Ortholog(s) have nicotinamide-nucleotide adenylyltransferase activity and role in NAD biosynthetic process; ortholog of Sc Nma1
CAGL0M12551g		1.45909	0.603215	2.74935	Ortholog(s) have role in energy reserve metabolic process
CAGL0A00737g		1.45	0.25	2.73	Has domain(s) with predicted transmembrane transporter activity, role in transmembrane transport and integral component of membrane, membrane localization
CAGL0C04191g		1.43564	0.381824	2.70501	Ortholog(s) have succinate-semialdehyde dehydrogenase [NAD(P)+] activity
CAGL0A01284g	EPA10	1.44	0.25	2.7	Predicted adhesin
CAGL0K07458g		1.42879	0.372604	2.69221	Ortholog(s) have protein serine/threonine kinase activity	1
CAGL0H06017g	FLR1	1.42751	0.250208	2.68983	Multidrug transporter of the major facilitator superfamily involved in 5-flucytosine resistance
CAGL0I00418g		1.42	0.33	2.67	Ortholog(s) have electron transfer activity, stearoyl-CoA 9-desaturase activity and role in mitochondrion inheritance, response to ethanol, unsaturated fatty acid biosynthetic process; ortholog of Sc Ole1
CAGL0C01419g		1.4	0.53	2.65	Ortholog(s) have RNA binding, mRNA binding, poly(U) RNA binding activity
CAGL0A01243g		1.41	0.66	2.65	Has domain(s) with predicted transmembrane transporter activity, role in transmembrane transport and integral component of membrane localization
CAGL0F00605g	GLK1	1.40251	0.445108	2.64362	Aldohexose specific glucokinase
CAGL0G03773g		1.4	0.6	2.64	Ortholog(s) have role in endoplasmic reticulum tubular network membrane organization, nuclear envelope organization, nuclear pore organization
CAGL0L02717g		1.4	0.25	2.64	Unknown function; Ortholog of Sc AIM41
CAGL0M08426g		1.39995	0.103703	2.63892	Unknown function	3
CAGL0K02629g		1.4	0.21	2.63	Ortholog(s) have intracellular anatomical structure localization
CAGL0J04576g		1.38	0.72	2.61	Has domain(s) with predicted role in peptidyl-diphthamide biosynthetic process from peptidyl-histidine and cytoplasm localization
CAGL0K07007g		1.38	0.35	2.61	Ortholog(s) have role in aerobic respiration and P-body
CAGL0B03531g		1.38	0.13	2.6	Unknown function
CAGL0F01859g		1.37488	0.12021	2.59347	Ortholog(s) have role in ascospore wall assembly and cytoplasm
CAGL0L00649g		1.37247	0.405695	2.58913	Acetyl-coenzyme A synthetase
CAGL0A01628g		1.37	0.58	2.58	Transcriptional regulatory protein; ortholog of ScMig1
CAGL0K04235g		1.36406	0.458544	2.57409	Putative transaldolase	1
CAGL0K10604g		1.35	0.35	2.56	Ortholog(s) have calmodulin-dependent protein kinase activity; Ortholog of Sc CMK1
CAGL0H00682g		1.35	0.5	2.56	Has domain(s) with predicted mannosyl-oligosaccharide glucosidase activity
CAGL0I01166g		1.36	0.34	2.56	Thioredoxin reductase (NADPH)
CAGL0D02552g		1.35567	0.0673978	2.55917	Unknown function
CAGL0F04719g		1.35512	0.441062	2.55818	Ortholog(s) have glycogen (starch) synthase activity
CAGL0G09603g		1.35	0.3	2.55	Unknown function
CAGL0J09196g		1.35	0.03	2.55	Unknown function
CAGL0G00308g	SCW4	1.35	0.32	2.55	Putative transglycosidase with a predicted role in the modification of 1,3-beta-glucan
CAGL0I04180g	AMT1	1.34198	0.164741	2.535	Metal-activated transcription factor
CAGL0A01716g		1.34142	0.471004	2.53401	Ortholog(s) have nicotinamidase activity, role in chromatin silencing at telomere
CAGL0I02926g		1.32	1	2.51	Ortholog(s) have mRNA 3'-UTR binding, mRNA 5'-UTR binding, translation repressor activity
CAGL0C03223g	SDH2	1.33	1.12	2.51	Putative iron-sulfur protein subunit of succinate dehydrogenase
CAGL0A04037g		1.33	0.17	2.51	Ortholog(s) have role in rRNA processing
CAGL0E05500g		1.33	1.54	2.51	Ortholog(s) have RNA polymerase I activity, promoter-specific chromatin binding activity
CAGL0K03575g		1.32243	0.253411	2.50087	Has domain(s) with predicted single-stranded DNA binding activity
CAGL0I09592g		1.32	0.12	2.5	Ortholog(s) have carbamoyl-phosphate synthase (glutamine-hydrolyzing) activity, role in arginine biosynthetic process
CAGL0A03652g		1.32	1.19	2.5	Ortholog(s) have role in maturation of 5.8S rRNA from tricistronic rRNA transcript (SSU-rRNA, 5.8S rRNA, LSU-rRNA), maturation of LSU-rRNA from tricistronic rRNA transcript (SSU-rRNA, 5.8S rRNA and LSU-rRNA)
CAGL0D05236g		1.31787	0.622422	2.49297	Has domain(s) with predicted nucleic acid binding
CAGL0L05258g		1.31398	0.32902	2.48627	Ortholog(s) have sulfiredoxin activity and role in cellular protein localization	1
CAGL0G01408g		1.30906	0.120299	2.47779	Unknown function
CAGL0B01078g		1.30556	0.0886855	2.4718	Unknown function	1
CAGL0I02134g	PEX21B	1.3	0.14	2.47	Ortholog(s) have role in protein import into peroxisome matrix and cytosol
CAGL0D06512g		1.2991	0.0382964	2.46076	Putative membrane bound guanine nucleotide exchange factor	1
CAGL0L08448g		1.3	0.71	2.46	Ortholog(s) have role in eisosome assembly
CAGL0M01716g		1.3	0.78	2.46	Ortholog(s) have DNA-binding transcription activator activity; ortholog of Sc Tec1
CAGL0C02739g		1.28794	0.737504	2.44179	Ortholog(s) have role in mitochondrion organization, phospholipid homeostasis
CAGL0A00341g		1.28266	0.837711	2.43288	Ortholog(s) have fatty acid alpha-oxygenase activity and role in fatty acid alpha-oxidation
CAGL0F03267g	LAM4	1.28	0.45	2.43	Ortholog(s) have sterol binding, sterol transfer activity and cortical endoplasmic reticulum localization
CAGL0L12892g		1.27	0.51	2.42	Ortholog(s) have role in actin cytoskeleton organization, inositol lipid-mediated signaling,
CAGL0E03652g	ISA1	1.28	0.01	2.42	Has domain(s) with predicted iron-sulfur cluster binding,
CAGL0K01859g		1.25	0.81	2.39	Ortholog(s) have histone-glutamine methyltransferase activity, mRNA binding, rRNA methyltransferase activity
CAGL0H02387g		1.23315	0.509039	2.3508	Putative trehalose-6-phosphate synthase/phosphatase subunit	1
CAGL0H04257g	MT-II	1.23295	0.114036	2.35048	Copper-binding metallothionein
CAGL0I10340g	PWP5	1.23	0.63	2.35	Cell wall adhesin
CAGL0L06820g		1.23	0.05	2.34	Ortholog(s) have role in cellular response to heat, cellular response to salt stress, protein phosphorylation, regulation of protein catabolic process
CAGL0F04521g		1.2214	0.290592	2.33172	Unknown function; Ortholog of Sc: ECM13
CAGL0B00638g		1.2176	0.267743	2.3256	Ortholog(s) have ATPase, nicotinamide-nucleotide adenylyltransferase activity
CAGL0M02409g		1.22	0.92	2.32	Ortholog(s) have rRNA binding activity and role in maturation of LSU-rRNA from tricistronic rRNA transcript
CAGL0D00594g		1.21	0.29	2.31	Ortholog(s) have role in negative regulation of transcription by RNA polymerase I and Rpd3L complex localization
CAGL0K07590g	MYO1	1.21	0.35	2.31	Putative myosin
CAGL0I10494g		1.2	0.63	2.3	Ortholog(s) have role in eisosome assembly, plasma membrane organization, protein localization to plasma membrane and eisosome, growing cell tip, membrane raft, plasma membrane localization
CAGL0M09977g		1.19	0.92	2.29	Ortholog(s) have tRNA dihydrouridine synthase activity
CAGL0K08624g	HAP4	1.19	0.24	2.29	Component of CCAAT-binding factor complex that functions as transcription factor
CAGL0I10054g		1.2	0.03	2.29	Ortholog(s) have glucosidase activity, role in (1->6)-beta-D-glucan biosynthetic process,
CAGL0J08184g		1.2	0.26	2.29	Ortholog(s) have basic amino acid transmembrane transporter activity and role in basic amino acid transport
CAGL0L04950g		1.19	0.82	2.28	Unknown function
CAGL0B02431g		1.19	1.03	2.28	Ortholog(s) have NADH dehydrogenase (ubiquinone) activity, role in NADH oxidation,
CAGL0A03674g		1.19	0.4	2.28	Ortholog(s) have rRNA (adenine) methyltransferase activity
CAGL0G06248g		1.19	0.42	2.28	Ortholog(s) have role in maturation of 5.8S rRNA from tricistronic rRNA transcript
CAGL0H09724g		1.19	1.23	2.28	Ortholog(s) have GTPase activity, RNA binding activity and role in maturation of LSU-rRNA from tricistronic rRNA transcript
CAGL0D00946g		1.18416	0.01521	2.27231	Putative phosphatidylinositol transfer protein	3
CAGL0H05709g		1.18	1.21	2.27	Ortholog(s) have role in assembly of large subunit precursor of preribosome, rRNA processing, ribosomal large subunit biogenesis
CAGL0J09284g		1.18	0.46	2.26	Unknown function; Ortholog of Sc YDL129W
CAGL0J05698g		1.18	0.18	2.26	Ortholog(s) have RNA polymerase III activity
CAGL0K02233g		1.17	1.08	2.25	Ortholog(s) have role in maturation of 5.8S rRNA from tricistronic rRNA transcript (SSU-rRNA, 5.8S rRNA, LSU-rRNA)
CAGL0L07678g		1.16	0.53	2.24	Putative essential 18S rRNA dimethylase
CAGL0E01881g	YPS11	1.17	0.25	2.24	Aspartic protease
CAGL0H08888g		1.16	0.41	2.23	Ortholog(s) have role in sphingolipid biosynthetic process
CAGL0E02695g	LIG4	1.16	0.17	2.23	DNA ligase IV
CAGL0M07205g		1.15	0.24	2.22	Ortholog(s) have role in cellular protein localization, nucleus-vacuole junction assembly
CAGL0M11154g		1.14	1.05	2.2	Unknown function
CAGL0J11066g		1.14	0.73	2.2	Ortholog(s) have chromatin binding activity and role in DNA replication initiation, pre-replicative complex assembly involved in nuclear cell cycle DNA replication
CAGL0H01837g		1.14	0.57	2.2	Ortholog(s) have protein kinase activity, role in G1/S transition of mitotic cell cycle, cellular ion homeostasis, putrescine transport, spermidine transport, spermine transport and cytoplasm, nucleus, plasma membrane localization
CAGL0C04323g	NTH2	1.13278	0.723002	2.1928	Cytosolic neutral trehalase involved in hydrolysis of intracellular trehalose
CAGL0M12947g	PUP1	1.13	0.66	2.19	Mitochondria-localized protein; gene is upregulated in azole-resistant strain
CAGL0K09922g		1.13	0.19	2.19	Ortholog(s) have RNA binding, flap-structured DNA binding activity and role in nuclear-transcribed mRNA catabolic process
CAGL0G00264g		1.13	0.87	2.19	Ortholog(s) have enzyme activator activity, telomerase inhibitor activity
CAGL0E00649g		1.12597	0.0772742	2.18248	Ortholog(s) have [pyruvate dehydrogenase (lipoamide)] phosphatase activity
CAGL0J00253g		1.12	0.34	2.18	Unknown function
CAGL0J11088g		1.12	0.31	2.18	Unknown function
CAGL0C00759g		1.12	0.69	2.18	Ortholog(s) have transcription coactivator activity, role in chromatin silencing at telomere
CAGL0E03289g		1.12	0.79	2.18	Ortholog(s) have ATPase activator activity
CAGL0H08844g		1.12335	0.658795	2.17852	Putative adhesin-like protein	1
CAGL0H08778g		1.12	0.17	2.17	Ortholog(s) have mRNA binding activity and role in nuclear-transcribed mRNA catabolic process, deadenylation-dependent decay
CAGL0H02123g		1.12	0.16	2.17	Ortholog(s) have mRNA binding activity and role in mRNA splice site selection, mRNA splicing, via spliceosome, positive regulation of mRNA splicing, via spliceosome
CAGL0L00803g		1.12	0.42	2.17	Ortholog(s) have role in regulation of glycogen biosynthetic process
CAGL0H09504g		1.12	0.29	2.17	Ortholog(s) have oxygen-dependent protoporphyrinogen oxidase activity, role in heme biosynthetic process
CAGL0G06182g		1.11431	0.0316637	2.16491	Unknown function; Ortholog of Sc YHR131C
CAGL0L03047g		1.11	0.67	2.16	Ortholog(s) have role in maturation of LSU-rRNA from tricistronic rRNA transcript (SSU-rRNA, 5.8S rRNA, LSU-rRNA) and nucleolus localization
CAGL0F08041g	PFK1	1.11	0.01	2.16	Putative phosphofructokinase
CAGL0I08547g		1.11	0.94	2.16	Ortholog(s) have role in positive regulation of cellular respiration and chromatin, nucleus localization
CAGL0E01177g	CPR1	1.11	0.39	2.16	Cyclophilin
CAGL0E02321g		1.11	0.08	2.15	Putative phospholipase B
CAGL0A01199g	DIP5	1.11	0.16	2.15	Putative dicarboxylic amino acid permease
CAGL0J03740g		1.09	0.66	2.14	Ortholog(s) have role in ascospore formation, ascospore wall assembly
CAGL0L01089g	GLT1	1.1	0.07	2.14	Ortholog(s) have glutamate synthase (NADH) activity and role in L-glutamate biosynthetic process
CAGL0I10604g		1.1	0.05	2.14	Unknown function
CAGL0D05632g		1.1	0.46	2.14	Ortholog(s) have copper chaperone activity, role in mitochondrial cytochrome c oxidase assembly
CAGL0K04323g		1.09153	0.241408	2.131	Unknown function; Ortholog of Sc YGR053C
CAGL0L02497g	FBA1	1.09	0.47	2.13	Fructose-bisphosphate aldolase
CAGL0M01210g		1.09	0.67	2.13	Ortholog(s) have role in rRNA processing
CAGL0I04730g		1.08	0.69	2.12	Ortholog(s) have large ribosomal subunit rRNA binding, ribosomal large subunit binding activity, role in ribosomal large subunit export from nucleus and cytosol localization
CAGL0I02398g		1.09	0.69	2.12	Ortholog(s) have large ribosomal subunit rRNA binding, ribosomal large subunit binding activity, role in ribosomal large subunit export from nucleus and cytosol localization
CAGL0M11638g		1.07	0.4	2.11	Ortholog(s) have 3'-5'-exoribonuclease activity
CAGL0H04543g		1.08	0.23	2.11	Ortholog(s) have role in endoplasmic reticulum membrane organization, phospholipid biosynthetic process
CAGL0M10153g		1.08	0.09	2.11	Ortholog(s) have protein serine/threonine kinase activity
CAGL0M02717g		1.08	0.24	2.11	Predicted GPI-linked cell wall protein
CAGL0L06864g		1.08	0.44	2.11	Putative protein related to ECM3
CAGL0L11440g		1.07	0.38	2.1	Ortholog(s) have lipid binding activity
CAGL0M00484g		1.07	0.63	2.1	Ortholog(s) have guanine phosphoribosyltransferase activity,
CAGL0G05467g		1.07	0.25	2.1	Unknown function
CAGL0F00561g		1.07	0.66	2.1	Ortholog(s) have RNA polymerase I activity
CAGL0F04895g		1.06	0.57	2.09	Ortholog(s) have glycogen phosphorylase activity
CAGL0L05016g		1.06139	0.00818483	2.08694	Unknown function; Ortholog of Sc STB6
CAGL0J04598g		1.05	0.47	2.08	Ortholog(s) have dihydroorotase activity and role in 'de novo' pyrimidine nucleobase biosynthetic process
CAGL0G03443g		1.06	0.42	2.08	Ortholog(s) have nuclear localization sequence binding activity and role in NLS-bearing protein import into nucleus, protein import into nucleus, regulation of pseudohyphal growth
CAGL0L05170g		1.06	0.65	2.08	Ortholog(s) have role in ribosomal large subunit biogenesis
CAGL0F05709g		1.05	0.21	2.07	Ortholog(s) have role in bipolar cellular bud site selection
CAGL0L00671g	FCY21	1.05	0.05	2.07	Purine-cytosine transporter
CAGL0I03366g		1.05	0.31	2.07	Ortholog(s) have ATPase, adenylate kinase activity and role in cellular response to oxidative stress, maturation of SSU-rRNA from tricistronic rRNA transcript
CAGL0E05654g		1.04771	0.0819087	2.06725	Ortholog(s) have phosphatidylglycerol phospholipase C activity
CAGL0C00253g		1.04	0.05	2.06	Predicted adhesin
CAGL0C03369g		1.04	0.65	2.06	Ortholog(s) have large ribosomal subunit rRNA binding activity
CAGL0G01166g		1.04	0.13	2.06	Unknown function
CAGL0C05577g		1.04	0.14	2.06	Ortholog(s) have role in ascospore wall assembly
CAGL0I01782g		1.04	0.01	2.06	Has domain(s) with predicted small GTPase binding activity
CAGL0B02387g		1.04	0.19	2.06	Ortholog(s) have poly(A)-specific ribonuclease activity and role in polyadenylation-dependent RNA catabolic process
CAGL0K10714g		1.03864	0.175983	2.0543	Ortholog(s) have ubiquitin protein ligase binding activity and role in adaptation of signaling pathway by response to pheromone
CAGL0K09042g		1.03	0.6	2.05	Unknown function; Ortholog of Sc TMA16
CAGL0D05434g	ROX1	1.04	0.36	2.05	Protein involved in regulation of ergosterol biosynthesis
CAGL0K08844g		1.04	0.14	2.05	Ortholog(s) have role in mitochondrion organization
CAGL0G00924g	GLM5	1.04	0.61	2.05	Gene used for molecular typing of C. glabrata strain isolates
CAGL0F07513g		1.03	0.25	2.04	Unknown function
CAGL0I07843g	ADH1	1.03	0	2.04	Putative alcohol dehydrogenase isoenzyme III	1
CAGL0G01056g	GAS3	1.02	0.02	2.03	Putative glycoside hydrolase of the Gas/Phr family
CAGL0A01366g	EPA9	1.01	0.15	2.02	Predicted adhesin
CAGL0F05115g		1.01	0.19	2.02	Unknown function
CAGL0D06424g	ACO1	1.01	0.19	2.02	Putative aconitate hydratase
CAGL0C04785g		1.02	0.1	2.02	Unknown function
CAGL0B04455g		1.00753	0.199092	2.01046	Ortholog(s) have L-glutamine transmembrane transporter activity	1
CAGL0D00682g		1	0.29	2	Has domain(s) with predicted nucleic acid binding activity
CAGL0M10439g	NTH1	1	0.33	2	Cytosolic neutral trehalase involved in hydrolysis of intracellular trehalose
CAGL0L08294g		-1.01	0.09	-2.01	Ortholog(s) have role in axial cellular bud site selection and cell division site
CAGL0F00957g	TPD3	-1.01	0.02	-2.01	Putative serine/threonine protein phosphatase 2A
CAGL0H02849g		-1.01	0.02	-2.01	Ortholog(s) have role in DNA-dependent DNA replication
CAGL0D00462g		-1.01	0.43	-2.02	Ortholog(s) have DNA-binding transcription repressor activity
CAGL0M05313g		-1.01	0.3	-2.02	Unknown function; Ortholog of Sc YBR197C
CAGL0G05852g		-1.02	0.22	-2.03	Ortholog(s) have dCMP deaminase activity and role in dTMP biosynthetic process
CAGL0G05071g		-1.02	0.5	-2.03	Ortholog(s) have serine C-palmitoyltransferase activity, role in sphingolipid biosynthetic process
CAGL0L07370g		-1.02	0.05	-2.04	Ortholog(s) have UDP-N-acetylglucosamine diphosphorylase activity
CAGL0F05841g		-1.03	0.35	-2.05	Ortholog(s) have role in adaptation of signaling pathway by response to pheromone involved in conjugation with cellular fusion, protein deneddylation and COP9 signalosome localization
CAGL0E04576g		-1.03	0.01	-2.05	Putative regulatory subunit of kinase complex involved in initiation of DNA replication
CAGL0J10978g		-1.02	0.28	-2.05	Ortholog(s) have phosphatidylinositol-4,5-bisphosphate binding activity
CAGL0A02574g		-1.03	0.17	-2.06	Ortholog(s) have anthranilate phosphoribosyltransferase activity; ortholog of Sc Trp4
CAGL0A02596g		-1.04	0.04	-2.08	Ortholog(s) have calmodulin binding
CAGL0K09262g		-1.04	0.13	-2.08	Ortholog(s) have actin monomer binding
CAGL0M00132g	EPA12	-1.04	0.23	-2.08	Predicted adhesin
CAGL0F02035g	CTF19	-1.04	0	-2.08	Unknown function
CAGL0A00451g	PDR1	-1.05	0.12	-2.09	Zinc finger transcription factor, activator of drug resistance genes via pleiotropic drug response elements (PDRE)
Cgla_YGOB_Anc_1.437		-1.05	0.58	-2.09	Unknown function
CAGL0L09471g		-1.05	0.05	-2.1	Ortholog(s) have DNA primase activity
CAGL0K07161g		-1.05	0.22	-2.1	Has domain(s) with predicted catalytic activity
CAGL0L10604g		-1.05	0.36	-2.1	Putative protein involved in cis-Golgi membrane traffic
CAGL0E00275g	EPA20	-1.05	0.57	-2.1	Predicted adhesin
CAGL0M02871g		-1.05	0.31	-2.1	Ortholog(s) have alpha-1,2-mannosyltransferase activity
CAGL0F07491g		-1.05	0.42	-2.11	Ortholog(s) have myosin II heavy chain binding, myosin V binding activity
CAGL0H05621g	RLM1	-1.05	0.37	-2.11	Putative transcription factor with a predicted role in cell wall integrity
CAGL0B01188g		-1.06	0.01	-2.12	Ortholog(s) have chromatin binding activity
CAGL0G07188g		-1.07	0.1	-2.13	Unknown function
CAGL0H02805g		-1.07	0.03	-2.13	Ortholog(s) have ATPase, DNA binding, cohesin loading activity, double-stranded DNA binding, protein kinase binding, topological DNA co-entrapment activity
CAGL0J03256g		-1.06	0.09	-2.13	Ortholog(s) have MAP kinase tyrosine phosphatase activity
CAGL0L08068g		-1.08	0.23	-2.15	Ortholog(s) have single-stranded DNA binding activity
CAGL0G00726g	RFA1	-1.08	0.04	-2.15	DNA replication factor A
CAGL0J07502g		-1.07742	0.0754372	-2.15483	Putative protein similar to globins with a heme-binding domain
CAGL0I04796g		-1.08	0.09	-2.16	Ortholog(s) have copper ion binding activity, role in cell redox homeostasis
CAGL0D04268g		-1.09	0.01	-2.17	Ortholog(s) have role in DNA-dependent DNA replication
CAGL0K11682g		-1.09	0.03	-2.17	Ortholog(s) have role in autophagy
CAGL0L01749g		-1.09	0.27	-2.17	Ortholog(s) have DNA primase activity
CAGL0A03454g		-1.09	0	-2.17	Ortholog(s) have DNA translocase activity, role in chromatin remodeling
CAGL0J02662g	IRC5	-1.08	0.05	-2.17	Unknown function
CAGL0C04829g		-1.09	0.13	-2.18	Unknown function; Ortholog of Sc YJR112W-A
CAGL0D06710g		-1.1	0.16	-2.19	Unknown function
CAGL0M08756g		-1.09	0.17	-2.19	Putative exo-1,3-beta-glucanase
CAGL0B00990g	HBN1	-1.09995	0.174817	-2.1999	Ortholog(s) have oxidoreductase activity, acting on NAD(P)H
CAGL0H06831g		-1.1	0.14	-2.2	Has domain(s) with predicted oxidoreductase activity
CAGL0K02761g		-1.11	0.01	-2.22	Ortholog(s) have ubiquitin binding activity
CAGL0K02475g	DSS4	-1.11	0.58	-2.22	GDP/GTP exchange factor for Sec4p
CAGL0B02211g	CCH1	-1.12	0.04	-2.23	Putative calcium transporte
CAGL0J05786g		-1.12	0.2	-2.24	Has domain(s) with predicted zinc ion binding activity
CAGL0D02684g		-1.13	0.02	-2.25	Ortholog(s) have microtubule binding, molecular adaptor activity
CAGL0D01034g	VIG9	-1.12	0.31	-2.25	GDP-mannose pyrophosphorylase involved in the synthesis of GDP-mannose for protein glycosylation
CAGL0G07271g	TSA1	-1.13	0.65	-2.26	Putative thioredoxin peroxidase
CAGL0E01727g	YPS3	-1.13	0.03	-2.26	Aspartic protease
CAGL0F06391g		-1.14	0.17	-2.27	Ortholog(s) have GTPase activator activity
CAGL0K00517g		-1.14	0.4	-2.28	Ortholog(s) have protein serine/threonine kinase activity
CAGL0D04422g		-1.14	0.1	-2.28	rtholog(s) have fluoride transmembrane transporter activity
CAGL0L10714g	ERG2	-1.15	0.07	-2.29	C-8 sterol isomerase
CAGL0E04224g		-1.14	0.04	-2.29	Unknown function
CAGL0F02079g		-1.15	0.13	-2.3	Ortholog(s) have DNA secondary structure binding, cohesin loading activity, double-stranded DNA binding, minor groove of adenine-thymine-rich DNA binding
CAGL0I07315g		-1.15	0.5	-2.3	Ortholog(s) have pyridoxal phosphatase activity
CAGL0K12870g		-1.15	0.46	-2.3	Ortholog(s) have role in mitochondrial cytochrome c oxidase assembly
CAGL0H02035g		-1.15002	0.42581	-2.30004	Ortholog(s) have histone acetyltransferase activity, methylated histone binding activity
CAGL0F04873g		-1.16	0.3	-2.31	Ortholog(s) have glucosidase activity and role in (1->6)-beta-D-glucan biosynthetic process
CAGL0K01045g		-1.15585	0.456944	-2.31171	Ortholog(s) have enzyme regulator activity, guanyl-nucleotide exchange factor activity, translation initiation factor activity
CAGL0I08591g		-1.16	0.05	-2.32	Unknown function; Ortholog of Sc YER158C
CAGL0L00539g		-1.16	0.3	-2.32	Ortholog(s) have role in ubiquitin-dependent ERAD pathway
CAGL0I05082g		-1.16264	0.243506	-2.32529	Has domain(s) with predicted nucleic acid binding
CAGL0M14091g		-1.17	0.41	-2.34	Putative quinone reductase/NADPH dehydrogenase
CAGL0F00275g		-1.17	0.26	-2.34	Ortholog(s) have GTP binding, phosphatidylinositol-4-phosphate binding, phosphatidylinositol-5-phosphate binding, structural constituent of cytoskeleton activity
CAGL0B01287g	BUD5	-1.17	0.13	-2.34	Has domain(s) with predicted guanyl-nucleotide exchange factor activity, role in regulation of small GTPase mediated signal transduction, small GTPase mediated signal transduction and intracellular anatomical structure localization
CAGL0J00693g		-1.18	0.21	-2.35	Ortholog(s) have calcium-dependent ATPase activity, microfilament motor activity, myosin II light chain binding, myosin light chain binding activity
CAGL0F00253g		-1.18	0.46	-2.35	Ortholog(s) have anthranilate synthase activity; ortholog of Sc Trp3
CAGL0M05621g		-1.18	0.18	-2.36	Ortholog(s) have mannosyltransferase activity and role in glycosphingolipid biosynthetic process, mannosyl-inositol phosphorylceramide biosynthetic process, sphingolipid biosynthetic process
CAGL0K01419g		-1.1816	0.0401182	-2.3632	Ortholog(s) have RNA binding activity, role in mRNA processing,
CAGL0B04697g		-1.19	0.18	-2.37	Ortholog(s) have Golgi apparatus, Golgi cisterna localization
CAGL0M08206g		-1.18	0.01	-2.37	Unknown function
CAGL0K00341g		-1.18	0.77	-2.37	Unknown function
CAGL0K00913g		-1.18672	0.0840325	-2.37344	Ortholog(s) have formate-tetrahydrofolate ligase activity, methenyltetrahydrofolate cyclohydrolase activity, methylenetetrahydrofolate dehydrogenase (NADP+) activity,
CAGL0M05049g		-1.19	0.1	-2.38	Putative glycoside hydrolase
CAGL0J05610g	TOP2	-1.2	0.27	-2.4	DNA topoisomerase II
CAGL0E06446g		-1.20242	0.222513	-2.40484	Ortholog(s) have RNA lariat debranching enzyme activity and role in RNA catabolic process
CAGL0M08448g		-1.20836	0.00219214	-2.41672	Ortholog(s) have mannose-ethanolamine phosphotransferase activity, role in ATP transport, GPI anchor biosynthetic process
CAGL0B03333g		-1.21	0.36	-2.42	Ortholog(s) have RNA polymerase II C-terminal domain phosphoserine binding
CAGL0H02959g	TOS8	-1.21	0.3	-2.42	Ortholog(s) have chromatin binding activity
CAGL0H03421g		-1.21	1.26	-2.42	Ortholog(s) have structural molecule activity and role in karyogamy
CAGL0M02233g	RAD53	-1.24	0.07	-2.48	Protein involved in response to DNA damage;
CAGL0M06457g		-1.25	0.08	-2.5	Ortholog(s) have calcium ion transmembrane transporter activity
Cgla_YGOB_YLR146W-A		-1.25	0.37	-2.5	Unknown function
CAGL0H07051g		-1.25	0.29	-2.5	Ortholog(s) have asparaginase activity
CAGL0C02651g		-1.25	0.25	-2.5	Ortholog(s) have unfolded protein binding activity, role in mitochondrial proton-transporting ATP synthase complex assembly and integral component of mitochondrial membrane, mitochondrial inner membrane localization
CAGL0L09042g		-1.26	0.15	-2.51	Ortholog(s) have H4 histone acetyltransferase activity
CAGL0I00484g		-1.25	0.44	-2.51	Ortholog(s) have glucan endo-1,6-beta-glucosidase activity
CAGL0C00341g		-1.26	0.39	-2.52	Ortholog(s) have double-stranded DNA binding, sequence-specific DNA binding activity
CAGL0M01848g		-1.26187	0.550176	-2.52375	Ortholog(s) have role in lysosomal microautophagy, signal transduction and fungal-type vacuole membrane, late endosome membrane localization
CAGL0E01397g		-1.27	0.26	-2.53	Ortholog(s) have TBP-class protein binding, chromatin binding,
CAGL0M06831g	CRZ1	-1.27	0.05	-2.53	Transcription factor; downstream component of the calcineurin signaling pathway
CAGL0D03652g		-1.26	0.11	-2.53	Protein of unknown function
CAGL0G08954g		-1.26	0.19	-2.53	Ortholog(s) have plasma membrane localization
CAGL0K08954g		-1.27	0.29	-2.55	Ortholog(s) have role in mitotic spindle pole body duplication
CAGL0H06171g		-1.27	0.27	-2.55	Ortholog(s) have role in tRNA wobble uridine modification
CAGL0H06875g	ARG81	-1.27	0.35	-2.55	Ortholog(s) have transcription coregulator activity, role in regulation of arginine metabolic process and nucleus localization
CAGL0B03091g		-1.3	0.08	-2.59	Ortholog(s) have role in cellular bud site selection, pseudohyphal growth and cellular bud tip, incipient cellular bud site, plasma membrane localization
CAGL0E02431g		-1.29	0.13	-2.59	Ortholog(s) have DNA topoisomerase type I (single strand cut, ATP-independent) activity
CAGL0K03685g		-1.29	0.03	-2.59	Ortholog(s) have role in vacuolar proton-transporting V-type ATPase complex assembly and integral component of endoplasmic reticulum membrane localization
CAGL0E01969g		-1.3	0.43	-2.6	Ortholog(s) have inorganic cation transmembrane transporter activity, solute:proton symporter activity
CAGL0F01991g		-1.31	0.32	-2.62	Unknown function; Ortholog of Sc YLR050C
CAGL0D04246g		-1.31335	0.0188653	-2.62671	Ortholog(s) have role in late endosome to vacuole transport
CAGL0F04763g		-1.32	0.19	-2.63	Ortholog(s) have role in chromatin silencing, sister chromatid cohesion and nucleus localization
CAGL0I01210g		-1.32	0.1	-2.64	Ortholog(s) have [cytochrome c]-lysine N-methyltransferase activity, role in peptidyl-lysine methylation and cytosol localization
CAGL0K00319g		-1.32	0.17	-2.64	Ortholog(s) have ATP binding, magnesium ion binding, ubiquitin activating enzyme activity, role in protein ubiquitination and cytoplasm, nucleus localization
CAGL0E00187g		-1.32	0.48	-2.64	Predicted adhesin
CAGL0M09911g		-1.33	0.62	-2.65	Ortholog(s) have tRNA dihydrouridine synthase activity and role in tRNA modification
CAGL0H03905g		-1.33	0.02	-2.66	Ortholog(s) have acetolactate synthase activity,
CAGL0K03993g		-1.33	0.06	-2.66	Ortholog(s) have RNA binding, rRNA primary transcript binding, ribonuclease MRP activity, ribonuclease P activity
CAGL0I01254g		-1.33081	0.379768	-2.66163	Ortholog(s) have URM1 activating enzyme activity, nitrate reductase (NADPH) activity
CAGL0K03663g		-1.34	0.32	-2.67	Unknown function; ortholog of Sc YMR122W-A
CAGL0I02530g		-1.33689	0.0147429	-2.67377	Ortholog(s) have N,N-dimethylaniline monooxygenase activity
CAGL0K00539g		-1.33946	0.0588899	-2.67892	Has domain(s) with predicted role in intracellular protein transport
CAGL0M06655g	HHT2	-1.34	0.06	-2.68	Histone H3
CAGL0D01716g		-1.34	0.17	-2.68	Ortholog(s) have DNA polymerase processivity factor activity
CAGL0J03146g		-1.35	0.27	-2.69	Ortholog(s) have CDP reductase activity, nucleoside diphosphate kinase activity, nucleotide binding, ribonucleoside-diphosphate reductase activity, thioredoxin disulfide as acceptor activity
CAGL0H09438g		-1.35	0.24	-2.69	Ortholog(s) have ATPase activator activity, cytoskeletal anchor activity, microtubule binding, microtubule lateral binding, microtubule plus-end binding activity
CAGL0F08833g		-1.34	0	-2.69	Putative adhesin-like protein
CAGL0D04466g		-1.34	0.23	-2.69	Ortholog(s) have role in DNA strand elongation involved in mitotic DNA replication, DNA-dependent DNA replication, double-strand break repair via break-induced replication, mitotic DNA replication initiation
CAGL0M14047g		-1.3476	0.0735936	-2.69521	Putative NADPH-dependent cinnamyl alcohol dehydrogenase
CAGL0C00209g	AWP7	-1.35	0.43	-2.7	Predicted adhesin
CAGL0E04906g		-1.36	0.33	-2.72	Ortholog(s) have ATPase activator activity, chaperone binding activity, role in cellular response to heat, protein folding and cytoplasm localization
CAGL0C00319g		-1.36	0.33	-2.73	Ortholog(s) have carboxypeptidase activity, role in nitrogen compound metabolic process, proteolysis involved in cellular protein catabolic process and fungal-type vacuole lumen localization
CAGL0K03025g		-1.37	0.27	-2.75	Ortholog(s) have role in vesicle-mediated transport and integral component of Golgi membrane localization
CAGL0F02519g	ZCF9	-1.3771	0.0752709	-2.7542	Has domain(s) with predicted DNA binding, DNA-binding transcription factor activity
CAGL0J09548g		-1.37738	0.118789	-2.75476	Ortholog(s) have DNA translocase activity
CAGL0K00363g		-1.38882	0.029782	-2.77764	Ortholog(s) have ABC-type oligopeptide transporter activity
CAGL0J04158g	RCN2	-1.39	0.27	-2.78	Regulator of calcineurin; regulated by the calcineurin-Crz1p pathway; acts as a feedback regulator of calcineurin-dependent signaling
CAGL0J00319g		-1.39	0.28	-2.79	Ortholog(s) have inositol monophosphate 1-phosphatase activity and role in inositol phosphate dephosphorylation
CAGL0F01727g		-1.40404	0.527472	-2.80809	Ortholog(s) have 3'-5'-exoribonuclease activity
CAGL0K01089g		-1.40577	0.725368	-2.81155	Ortholog(s) have G-quadruplex DNA binding activity and role in maturation of SSU-rRNA from tricistronic rRNA transcript
CAGL0A01606g		-1.41	0.42	-2.82	Ortholog(s) have double-stranded DNA binding activity, role in homologous chromosome pairing at meiosis, reciprocal meiotic recombination and condensed nuclear chromosome localization
CAGL0G04961g		-1.42	0.42	-2.84	Ortholog(s) have glutathione-disulfide reductase (NADPH) activity
CAGL0E01771g	YPS5	-1.43	0.39	-2.86	Putative aspartic protease; predicted GPI-anchor; member of a YPS gene cluster that is required for virulence in mice; gene is downregulated in azole-resistant strain
CAGL0M04191g	YPS1	-1.43599	0.361386	-2.87199	Aspartic protease
CAGL0L01793g		-1.44	0.06	-2.88	Ortholog(s) have structural constituent of cytoskeleton activity, role in spindle pole body duplication and central plaque of spindle pole body, intermediate layer of spindle pole body localization
CAGL0I01232g		-1.44	0.28	-2.88	Has domain(s) with predicted role in transport and integral component of membrane localization
CAGL0C04873g		-1.45	0.03	-2.9	Ortholog(s) have peroxisome localization
CAGL0K03553g		-1.46	0.61	-2.92	Ortholog(s) have dihydrofolate synthase activity and role in folic acid-containing compound biosynthetic process
CAGL0F04741g	CMK2	-1.49	0.2	-2.97	Ortholog(s) have calmodulin binding, calmodulin-dependent protein kinase activity, protein kinase activity
CAGL0M07381g		-1.48506	0.0505968	-2.97013	Ortholog(s) have mannosylphosphate transferase activity
CAGL0G06358g		-1.5	0.15	-2.99	Ortholog(s) have SNAP receptor activity and role in Golgi to plasma membrane transport, ascospore-type prospore membrane formation, endocytosis, exocytosis, vesicle fusion, vesicle-mediated transport
CAGL0M12903g		-1.5	0.2	-3	Putative epsilon-COP coatomer subunit
CAGL0J09416g		-1.50398	0.242962	-3.00796	Ortholog(s) have fungal-type vacuole lumen
CAGL0D04642g		-1.51	0.12	-3.02	Ortholog(s) have cyclin-dependent protein serine/threonine kinase regulator activity
CAGL0M00176g	BAT2	-1.52031	0.309718	-3.04062	Ortholog(s) have L-isoleucine transaminase activity
CAGL0K08668g	MET28	-1.52	0.63	-3.05	Unknown function
CAGL0L04136g		-1.53	0.35	-3.06	Ortholog(s) have gamma-tubulin binding activity
CAGL0D01474g		-1.53	0.15	-3.06	Unknown function
CAGL0L12320g		-1.53221	0.0529858	-3.06441	Ortholog(s) have role in mitochondrial genome maintenance
CAGL0H05313g		-1.53	0.18	-3.07	Unknown function; Ortholog of Sc YPL071C
CAGL0H08690g		-1.55	0.34	-3.09	Ortholog(s) have role in mRNA splicing, via spliceosome and transcriptionally active chromatin localization
CAGL0M12320g		-1.55	0.06	-3.09	Ortholog(s) have FAD transmembrane transporter activity; ortholog of Sc FLC2
CAGL0G09449g	CRH1	-1.55	0.05	-3.1	Putative glycoside hydrolase
CAGL0F07645g		-1.55727	0.808215	-3.11454	Ortholog(s) have role in endonucleolytic cleavage in 5'-ETS of tricistronic rRNA transcript
CAGL0K06721g		-1.56	0.03	-3.13	Ortholog(s) have DNA binding, nucleosome binding activity
CAGL0M06347g		-1.58	0.13	-3.17	Ortholog(s) have phytoceramidase activity, sphingosine N-acyltransferase activity,
CAGL0K12980g	BMT7	-1.6	0.14	-3.2	Beta mannosyltransferase
CAGL0J02750g		-1.61	0	-3.21	Unknown function; Ortholog of Sc CAJ1
CAGL0C03289g	YBT1	-1.61	0.6	-3.21	Putative ABC transporter involved in bile acid transport
CAGL0K01001g		-1.61927	0.0162454	-3.23853	Ortholog(s) have role in protein localization to plasma membrane, protein targeting to vacuole
CAGL0J08888g		-1.63	0.39	-3.25	Ortholog(s) have role in microtubule nucleation, mitotic cytokinesis, site selection, mitotic spindle midzone assembly
CAGL0G10219g	AWP12	-1.63135	0.257831	-3.2627	Predicted adhesin
CAGL0I01188g		-1.63963	0.0447733	-3.27925	Ortholog(s) have GTP binding, GTPase activity, molecular adaptor activity, phosphatidylinositol-4-phosphate binding, phosphatidylinositol-5-phosphate binding, structural constituent of cytoskeleton activity
CAGL0K00170g	EPA22	-1.64116	0.161191	-3.28231	Putative adhesin-like protein
CAGL0G00286g	GAS1	-1.65	0.1	-3.29	Glycoside hydrolase of the Gas/Phr family, involved in cell wall maintenance
CAGL0J07854g		-1.65	0.39	-3.29	Ortholog(s) have transcription export complex localization
CAGL0K00627g		-1.65	0.15	-3.3	Unknown function; Ortholog of Sc YJL193W
CAGL0K03619g		-1.66599	0.0255657	-3.33198	Ortholog(s) have role in centromere clustering
CAGL0J06402g		-1.66686	0.867686	-3.33372	Ortholog(s) have homocitrate synthase activity
CAGL0H06523g		-1.67	0.54	-3.34	Ortholog(s) have pantoate-beta-alanine ligase activity and role in pantothenate biosynthetic process
CAGL0K12892g		-1.7	0.21	-3.4	Ortholog(s) have GTPase activator activity and role in establishment or maintenance of actin cytoskeleton polarity
CAGL0D01012g		-1.7	0.07	-3.4	Ortholog(s) have DNA-binding transcription activator activity, RNA polymerase II-specific
CAGL0E02409g		-1.71	0.11	-3.42	Ortholog(s) have cellular bud neck, fungal-type vacuole localization
CAGL0K06743g	YBP1	-1.72992	0.257869	-3.45983	Protein involved in resistance to hydrogen peroxide;
CAGL0C01727g		-1.74	0.05	-3.48	Ortholog(s) have UDP-N-acetylglucosamine-dolichyl-phosphate N-acetylglucosaminephosphotransferase activity
CAGL0L00157g		-1.76011	0.0723656	-3.52022	Putative adhesin-like protein
CAGL0F05329g		-1.77	0.26	-3.55	Unknown function; Ortholog of Sc YDR210W
CAGL0M13563g		-1.8	0.24	-3.59	Ortholog(s) have role in endoplasmic reticulum to Golgi vesicle-mediated transport, retrograde transport
CAGL0K11946g		-1.81	0.35	-3.61	Unknown function
CAGL0J06864g		-1.81064	0.152435	-3.62129	Ortholog(s) have role in meiotic DNA recombinase assembly
CAGL0G07249g		-1.82848	0.014418	-3.65696	Ortholog(s) have RNA polymerase II transcription regulatory region sequence-specific DNA binding activity
CAGL0G07175g		-1.83346	0.556524	-3.66691	Has domain(s) with predicted RNA binding
CAGL0K03047g		-1.83	0.02	-3.67	Ortholog(s) have DNA binding, DNA binding, bending activity
CAGL0M04961g		-1.84	0.28	-3.68	Ortholog(s) have GTPase activator activity
CAGL0K00825g	SER2	-1.86	0.32	-3.72	Has domain(s) with predicted phosphatase activity, phosphoserine phosphatase activity and role in L-serine biosynthetic process
CAGL0F01683g		-1.86	0.48	-3.73	Predicted GPI-linked protein
CAGL0G08558g		-1.86	0.09	-3.73	Ortholog(s) have GTP binding, GTPase activity
CAGL0E02233g		-1.87304	0.112559	-3.74607	Unknown function
CAGL0D02596g		-1.87	0	-3.75	Ortholog(s) have role in DNA-dependent DNA replication
CAGL0M02167g		-1.9	0.24	-3.81	Unknown function; Ortholog of Sc PRM4
CAGL0H08712g		-1.91	0.22	-3.83	Has domain(s) with predicted phosphatidylinositol binding activity
CAGL0E04818g		-1.93	0.25	-3.86	Ortholog(s) have role in mitochondrion organization and extrinsic component of mitochondrial outer membrane localization
CAGL0G00594g	ERG26	-1.95	0.2	-3.89	Has domain(s) with predicted 3-beta-hydroxy-delta5-steroid dehydrogenase activity and role in steroid biosynthetic process
CAGL0G07689g		-1.95	0.19	-3.89	Putative GTPase required for vacuolar protein sorting
CAGL0L09581g		-1.97	0.37	-3.93	Has domain(s) with predicted dUTP diphosphatase activity
CAGL0M07634g		-2	0.03	-3.99	Ortholog(s) have role in pseudohyphal growth and cytosol
CAGL0K00297g		-2	0.01	-3.99	Ortholog(s) have phosphatidylinositol-3,5-bisphosphate 5-phosphatase activity,
CAGL0G01452g		-1.99	0.38	-3.99	Ortholog(s) have role in endoplasmic reticulum to Golgi vesicle-mediated transport and COPII-coated ER to Golgi transport vesicle, Golgi apparatus, endoplasmic reticulum localization
CAGL0H08261g		-2.01354	0.0423377	-4.02708	Ortholog(s) have role in autophagy of mitochondrion
CAGL0L10912g	TPO4	-2.03	0	-4.06	Polyamine exporter
CAGL0M04125g		-2.07	0.03	-4.14	Unknown function; Ortholog of Sc YNL320W
CAGL0L03267g	GAP1	-2.08	0.02	-4.16	Ortholog(s) have L-proline transmembrane transporter activity, amino acid transmembrane transporter activity
CAGL0I01650g		-2.11	0.02	-4.22	Unknown function; Ortholog of Sc YJR039W
CAGL0E02255g		-2.12	0.44	-4.24	Ortholog(s) have role in fungal-type cell wall organization
CAGL0M07612g		-2.21	0.14	-4.41	Ortholog(s) have polyamine oxidase activity and role in pantothenate biosynthetic process; ortholog of Sc FMS1
CAGL0C04763g		-2.25	0.38	-4.49	Has domain(s) with predicted integral component of membrane localization
CAGL0K00693g		-2.25	0	-4.5	Ortholog(s) have protein tyrosine kinase activity
CAGL0L05786g		-2.26643	0.0934215	-4.53285	Has domain(s) with predicted nucleic acid binding
CAGL0B02755g		-2.28	0.35	-4.57	Unknown function; Ortholog of Sc YLR361C-A
CAGL0G00858g		-2.31693	0.120114	-4.63386	Ortholog(s) have transmembrane signaling receptor activity
CAGL0E06666g	EPA12	-2.35169	0.303294	-4.70337	Epithelial adhesion protein
CAGL0H10626g	AWP13	-2.37977	0.189722	-4.75954	Predicted cell wall adhesin with a role in adhesion
CAGL0K04169g		-2.38	0.57	-4.77	Ortholog(s) have MAP kinase activity
CAGL0F00209g		-2.4	0.34	-4.81	Has domain(s) with predicted transmembrane transporter activity; ortholog of Sc Tna1
CAGL0D05478g		-2.43	1.31	-4.87	Ortholog(s) have protein phosphatase activator activity
CAGL0K00605g		-2.45706	0.115149	-4.91413	Ortholog(s) have ATP binding, ATPase, DNA replication origin binding, GTP binding, GTPase activity, chromatin binding, protein serine/threonine kinase activity
CAGL0C04499g		-2.46482	0.289778	-4.92963	Ortholog(s) have MAP kinase serine/threonine phosphatase activity
CAGL0H00110g		-2.46896	0.0400845	-4.93792	Adhesin-like protein with internal repeats
CAGL0E04180g		-2.47929	0.281696	-4.95858	Has domain(s) with predicted role in dolichol-linked oligosaccharide biosynthetic process
CAGL0M00616g		-2.61	0.34	-5.22	Has domain(s) with predicted peptidase activity and role in proteolysis
CAGL0K13024g	AED1	-2.61602	0.293674	-5.23204	Adhesin-like protein required for adherence to endothelial cells
CAGL0D00154g	AQY1	-2.66	0.54	-5.32	Has domain(s) with predicted channel activity
CAGL0K08272g		-2.79	0.02	-5.58	Ortholog(s) have sphingosine-1-phosphate phosphatase activity, role in phospholipid dephosphorylation
CAGL0E04774g		-2.79237	0.568334	-5.58474	Has domain(s) with predicted role in response to oxidative stress
CAGL0J04466g		-3.03383	0.538653	-6.06766	Ortholog(s) have role in fungal-type cell wall organization
CAGL0M03839g		-3.2057	0.367205	-6.4114	Ortholog(s) have role in apoptotic process
CAGL0A01221g		-3.25447	0.275338	-6.50895	Has domain(s) with predicted channel activity
CAGL0A02838g		-3.72	0.01	-7.45	Ortholog(s) have DNA binding
CAGL0B01166g	SWI6	-3.75702	0.084173	-7.51405	Ortholog(s) have DNA-binding transcription activator activity
CAGL0K08338g		-3.81942	0.031919	-7.63884	Unknown function
CAGL0G09339g		-3.85404	0.123997	-7.70809	Ortholog(s) have xylulokinase activity and role in xylulose catabolic process
CAGL0K00110g	AWP2	-3.89665	0.143221	-7.7933	Predicted adhesin
CAGL0K12056g		-4.19932	0.290591	-8.39863	Ortholog(s) have structural constituent of ribosome activity and mitochondrial small ribosomal subunit localization
CAGL0J02508g	AWP1	-4.29	0.07	-8.58	Predicted adhesin
CAGL0A02255g		-4.51795	0.0199071	-9.03589	Unknown function
CAGL0C01859g		-4.85728	0.327058	-9.71457	Has domain(s) with predicted integral component of membrane localization
Cgla_YGOB_Anc_3.484		-5.05	0.38	-10.09	Unknown function
CAGL0C00110g	EPA6	-5.19	0.23	-10.37	Sub-telomerically encoded adhesin with a role in cell adhesion;
CAGL0K00715g	RTA1	-6.09764	0.0948122	-12.1953	Putative protein involved in 7-aminocholesterol resistance
CAGL0A02299g		-7.33253	0.242595	-14.6651	Unknown function
CAGL0A02299g		-7.33253	0.242595	-14.6651	Unknown function

## Sheet: Table S7
Table S7. Comparative transcriptomic profiling of C. glabrata FFUL674 isolate, in comparison with the reference strain CBS138, after 2h of exposure to 32 mg/L of fluconazole. Cells of both strains were cultivated as detailed in materials and methods. Documented targets of CgPdr1 are highlighted in grey (for this it was selected among the activated genes those in which documented positive influenc…
ORF name	Gene name	Log2 FC (mRNA FFUL674 FLC /mRNA CBS138 FLC)	Std dev	mRNA FFUL674 FLC/ mRNA CBS138 FLC	Function	Nr PDRE motifs
CAGL0J11550g		6.585	1.18087	96.0025	Unknown function; ortholog of Sc YNL195
CAGL0E05984g		4.53	2.12132	23.1029	Unknown function
CAGL0H07469g		4.53	1.04652	23.1029	Predicted adhesin
CAGL0J00451g	TDH3	4.515	1.0253	22.8639	Putative glyceraldehyde-3-phosphate dehydrogenase
CAGL0L05434g	SUN4	4.23	0.523259	18.7654	Ortholog(s) have role in fungal-type cell wall organization or biogenesis
CAGL0G02563g		3.93	1.13137	15.2422	Similar to Sc UBP11; Has domain(s) with predicted thiol-dependent deubiquitinase activity and role in protein deubiquitination
CAGL0C03740g		3.87	0.367696	14.6213	Unknown function; ortholog of Sc Mit1
CAGL0M06963g		3.71	1.06066	13.0864	Similar to Sc SOL2; Ortholog(s) have role in tRNA export from nucleus and cytosol localization
CAGL0M12947g	PUP1	3.67	0.905097	12.7286	Mitochondria-localized protein; gene is upregulated in azole-resistant strain
CAGL0G10175g	AWP6	3.3	NaN	9.84916	Predicted adhesin
CAGL0J04004g		3.28	0.890955	9.71356	Ortholog(s) have role in lipid homeostasis, mitochondrion organization and integral component of mitochondrial membrane, mitochondrial outer membrane localization
CAGL0B02563g		3.22	1.01823	9.31787	Unknown function
CAGL0F07953g		3.2	2.27688	9.18959	Similar to ScSPG1; Unknown function
CAGL0F02717g	PDH1	3.2	0.226274	9.18959	Multidrug transporter, predicted plasma membrane ATP-binding cassette (ABC) transporter	5
CAGL0F07777g	ALD5	3.105	1.03945	8.60396	Putative aldehyde dehydrogenase
CAGL0A02002g		2.905	1.43543	7.49018	Unknown function; Ortholog of Sc YOL024W
CAGL0F04631g		2.9	1.64049	7.46426	Unknown function; Ortholog of Sc MOH1
CAGL0A02145g		2.825	1.13844	7.08614	Similar to ScYsc84; predicted to be involved in actin cytoskeleton organization
CAGL0L05192g		2.73821	0.609249	6.67242	Unknown function
CAGL0K02629g		2.695	1.27986	6.47554	Unknown function
CAGL0L13156g		2.61407	0.223913	6.12227	Ortholog(s) have enzyme inhibitor activity, role in ubiquitin recycling and endosome localization
CAGL0M14069g	PWP6	2.60684	0.57811	6.09169	Predicted adhesin	1
CAGL0D03894g	PRO1	2.6	0.169706	6.06287	Putative gamma-glutamyl phosphate reductase
CAGL0E01815g	YPS8	2.585	1.20915	6.00016	Putative aspartic protease
CAGL0I01166g	TRR1	2.575	0.997021	5.95871	Thioredoxin reductase (NADPH)
CAGL0E05456g		2.57	0.480833	5.9381	Unknown function; Ortholog of Sc YOR338w
CAGL0A02321g	HXT3	2.55	0.240416	5.85634	Ortholog(s) have fructose transmembrane transporter activity, glucose transmembrane transporter activity
CAGL0E06644g	EPA1	1.975	0.785	4.24	Predicted adhesin
CAGL0C03872g	TIR3	2.53	1.31522	5.77572	Putative GPI-linked cell wall protein involved in sterol uptake
CAGL0G04433g		2.51	0.0424264	5.6962	Unknown function; similar to Sc PRM10
CAGL0H00418g		2.505	1.1243	5.67649	Unknown function
CAGL0I09702g		2.47	0.735391	5.54044	Ortholog(s) have riboflavin transmembrane transporter activity, role in riboflavin transport and plasma membrane localization
CAGL0G03289g	SSA3	2.455	0.912168	5.48313	Heat shock protein of the HSP70 family
CAGL0K07337g		2.45	2.68701	5.46416	Has domain(s) with predicted ion channel activity, role in ion transport and membrane localization; ortholog of Sc Hsp30
CAGL0H00528g		2.44	0.721249	5.42642	Ortholog(s) have histone H3-methyl-lysine-4 demethylase activity, histone H3-tri/di/monomethyl-lysine-4 demethylase activity and histone demethylase activity (H3-dimethyl-K4 specific),
CAGL0L07766g		2.44	0.0282842	5.42642	Ortholog(s) have acetate transmembrane transporter activity, ammonium transmembrane transporter activity
Cgla_YGOB_YDR461C-A		2.435	0.275772	5.40764	Unknown function
CAGL0A01870g		2.36	2.1496	5.1337	Has domain(s) with predicted integral component of membrane localization; similar to Sc PEP1
CAGL0B00836g		2.35	0.0424265	5.09824	Ortholog(s) have peptide-methionine (R)-S-oxide reductase activity
CAGL0G02629g		2.34024	0.0375365	5.06388	Ortholog(s) have S-adenosylmethionine-dependent methyltransferase activity, rRNA (uridine-N3-)-methyltransferase activity, role in rRNA base methylation and nucleolus localization
CAGL0A01606g		2.325	0.431335	5.01066	Ortholog(s) have double-stranded DNA binding activity, role in homologous chromosome pairing at meiosis, reciprocal meiotic recombination and condensed nuclear chromosome localization
CAGL0A01826g	HXT5	2.325	1.63342	5.01066	Ortholog(s) have glucose transmembrane transporter activity,
CAGL0H06017g	FLR1	2.32	0.636396	4.99332	Multidrug transporter of the major facilitator superfamily;
CAGL0I07843g	ADH1	2.27	0.155564	4.82323	Putative alcohol dehydrogenase isoenzyme III	1
CAGL0L07678g		2.27	0.282843	4.82323	Putative essential 18S rRNA dimethylase;
CAGL0M01430g		2.26004	0.919028	4.79004	Ortholog(s) have role in maturation of SSU-rRNA from tricistronic rRNA transcript (SSU-rRNA, 5.8S rRNA, LSU-rRNA), positive regulation of transcription by RNA polymerase I
CAGL0G02057g		2.255	0.756604	4.77334	Unknown function
CAGL0K06259g	TSA2	2.255	1.9304	4.77334	Thiol-specific antioxidant protein
CAGL0J01331g		2.25	0.678822	4.75683	Unknown function; Ortholog of Sc YMR090
CAGL0H10076g	YRO2	2.25	2.19203	4.75683	Ortholog(s) have plasma membrane localization
DCP_22_7		2.225	0.883883	4.67511	Unknown function
CAGL0G00264g		2.22	0.39598	4.65893	Ortholog(s) have enzyme activator activity, telomerase inhibitor activity, role in box C/D RNA 3'-end processing, negative regulation of telomere maintenance via telomerase and nucleolus
CAGL0G02937g		2.22	0.268701	4.65893	Ortholog(s) have pyruvate decarboxylase activity and role in L-phenylalanine catabolic process; similar to Sc PDC6
CAGL0G08624g	QDR2	2.215	0.714178	4.64282	Drug:H+ antiporter of the Major Facilitator Superfamily	1
CAGL0K03421g		2.195	1.44957	4.5789	Ortholog(s) have phosphoglucomutase activity; similar to Sc PGM2
CAGL0I07865g		2.195	1.09602	4.5789	Unknown function	1
CAGL0J01023g		2.18314	0.244503	4.54142	Ortholog(s) have tRNA-specific adenosine deaminase activity and role in tRNA modification
CAGL0L04378g		2.17	0.890955	4.50023	Unknown function
CAGL0K05687g		2.16	0.424264	4.46915	Has domain(s) with predicted FMN binding; similar to Sc Oye2
CAGL0M05775g		2.15798	0.851775	4.46291	Has domain(s) with predicted RNA binding activity
CAGL0G01738g		2.13	0.86267	4.37717	Unknown function
CAGL0E01529g		2.125	0.53033	4.36203	Ortholog(s) have role in fructose 2,6-bisphosphate metabolic process; similar to Sc Pfk27
CAGL0I10670g		2.12	0.509117	4.34694	Unknown function
CAGL0G05544g		2.12	0.820244	4.34694	Ortholog(s) have role in cell morphogenesis involved in conjugation with cellular fusion and mating projection localization
CAGL0K12804g		2.085	0.289914	4.24275	Has domain(s) with predicted nucleic acid binding; similar to Sc BUD20
CAGL0I05610g		2.065	0.0212132	4.18434	Unknown function; Ortholog of Sc YNR014W	1
CAGL0M11902g		2.055	0.190919	4.15544	Unknown function; Ortholog of Sc FUN19
CAGL0M02915g		2.05	0.890955	4.14106	Ortholog(s) have role in autophagy of peroxisome, mitophagy and peroxisome localization
CAGL0G04785g		2.045	0.53033	4.12673	Unknown function
CAGL0B04235g		2.04	0.551543	4.11246	Protein with a predicted role in maintenance of ploidy
CAGL0E00517g		2.02749	0.498936	4.07694	Unknown function; ortholog of Sc YCR087C-A
CAGL0F05709g		2.02	0.692965	4.05584	Ortholog(s) have role in bipolar cellular bud site selection, cellular cation homeostasis and nucleus localization
CAGL0J02530g		2.015	0.26163	4.04181	Putative adhesion protein
CAGL0I08547g		2.0122	-0.438408	4.03397	Ortholog(s) have role in positive regulation of cellular respiration and chromatin, nucleus localization
CAGL0G00242g	YOR1	2	0.452548	4	Putative ABC transporter involved in multidrug efflux
CAGL0K03861g		1.73762	0.736377	3.38816	Ortholog(s) have unfolded protein binding activity, role in ribosome biogenesis and nucleolus localization
CAGL0G07106g	APT1	1.98281	0.33129	3.95263	Putative adenine phosphoribosyltransferase
CAGL0F01419g	AUS1	1.98	0.39598	3.94493	ATP-binding cassette transporter involved in sterol uptake
CAGL0M00484g		1.98	0.0989949	3.94493	Ortholog(s) have guanine phosphoribosyltransferase activity
CAGL0I04180g	AMT1	1.98	0.353553	3.94493	Metal-activated transcription factor
CAGL0G02453g		1.97	0.141421	3.91768	Ortholog(s) have dipeptide transmembrane transporter activity,
CAGL0L03696g		1.97	0.537401	3.91768	Has domain(s) with predicted role in transmembrane transport and integral component of membrane localization; similar to Sc ECM3
CAGL0D06578g		1.965	0.304056	3.90413	Ortholog(s) have copper ion binding activity; ortholog of Sc Cox19
CAGL0M02409g		1.96	0.523259	3.89062	Ortholog(s) have rRNA binding activity and role in maturation of LSU-rRNA from tricistronic rRNA transcript (SSU-rRNA, 5.8S rRNA, LSU-rRNA), rRNA processing, ribosomal large subunit export from nucleus
CAGL0A03674g		1.955	0.13435	3.87716	Ortholog(s) have rRNA (adenine) methyltransferase activity and nucleolus localization
CAGL0L03047g		1.945	0.572756	3.85038	Ortholog(s) have role in maturation of LSU-rRNA from tricistronic rRNA transcript (SSU-rRNA, 5.8S rRNA, LSU-rRNA) and nucleolus localization
CAGL0K09922g		1.94	0.282843	3.83706	Ortholog(s) have RNA binding, flap-structured DNA binding activity and role in nuclear-transcribed mRNA catabolic process, nuclear-transcribed mRNA poly(A) tail shortening, positive regulation of endodeoxyribonuclease activity
CAGL0F03927g		1.93244	0.593214	3.817	Ortholog(s) have GMP synthase (glutamine-hydrolyzing) activity and role in GMP biosynthetic process
CAGL0I07975g		1.9203	0.542546	3.78503	Ortholog(s) have 5S rRNA binding, rRNA primary transcript binding activity
CAGL0B04125g		1.91704	0.722188	3.77646	Ortholog(s) have RNA polymerase I activity, RNA polymerase III activity and role in tRNA transcription by RNA polymerase III
CAGL0K02233g		1.915	0.671751	3.77114	Ortholog(s) have role in maturation of 5.8S rRNA from tricistronic rRNA transcript (SSU-rRNA, 5.8S rRNA, LSU-rRNA), maturation of LSU-rRNA from tricistronic rRNA transcript (SSU-rRNA, 5.8S rRNA and LSU-rRNA)
CAGL0K09460g		1.9	0.353553	3.73213	Putative nucleolar protein required for pre-rRNA processing
CAGL0H03377g	DBP3	1.895	0.714178	3.71922	Ortholog(s) have ATP-dependent activity, acting on RNA, RNA helicase activity and role in endonucleolytic cleavage in ITS1 upstream of 5.8S rRNA from tricistronic rRNA transcript (SSU-rRNA, 5.8S rRNA, LSU-rRNA)
CAGL0D04026g		1.89	0.947523	3.70635	Ortholog(s) have 4-aminobutyrate transaminase activity, pyridoxal phosphate binding activity, role in cellular amide catabolic process, gamma-aminobutyric acid catabolic process, glutamate metabolic process and cytosol localization
CAGL0F06809g		1.88527	0.768406	3.69422	Ortholog(s) have preribosome binding
CAGL0L04950g		1.885	0.742462	3.69353	Unknown function
CAGL0F00561g		1.87679	0.51184	3.67256	Ortholog(s) have RNA polymerase I activity, RNA polymerase II-specific DNA-binding transcription factor binding activity; similar to Sc RPA12
CAGL0L04026g		1.87591	0.704747	3.67034	Ortholog(s) have role in invasive growth in response to glucose limitation, protein urmylation, pseudohyphal growth, tRNA wobble position uridine thiolation and cytosolic tRNA wobble base thiouridylase complex localization
CAGL0E05478g		1.875	0.714178	3.66802	Ortholog(s) have RNA polymerase I activity, role in nucleolar large rRNA transcription by RNA polymerase I, transcription by RNA polymerase I and RNA polymerase I complex localization
CAGL0K04235g		1.875	0.827315	3.66802	Putative transaldolase	1
CAGL0H02937g		1.67346	0.817353	3.22002	Ortholog(s) have role in endonucleolytic cleavage in 5'-ETS of tricistronic rRNA transcript (SSU-rRNA, 5.8S rRNA and LSU-rRNA)
CAGL0H08415g		1.85569	0.575919	3.61925	Ortholog(s) have role in tRNA 3'-trailer cleavage
CAGL0E01837g	YPS9	1.855	0.954594	3.61752	Putative aspartic protease
CAGL0J01848g		1.855	0.26163	3.61752	Ortholog(s) have RNA polymerase I activity, role in nucleolar large rRNA transcription by RNA polymerase I, transcription by RNA polymerase I and RNA polymerase I complex localization
CAGL0M01056g		1.85	0.59397	3.605	Unknown function
CAGL0J10252g		1.845	0.417193	3.59253	Ortholog(s) have rRNA primary transcript binding, single-stranded telomeric DNA binding, snoRNA binding activity, role in rRNA processing, ribosomal small subunit biogenesis
CAGL0L10516g		1.844	0.851967	3.59004	Ortholog(s) have role in ribosomal large subunit biogenesis
CAGL0F01925g		1.84	0.424264	3.5801	Ortholog(s) have role in endonucleolytic cleavage in 5'-ETS of tricistronic rRNA transcript (SSU-rRNA, 5.8S rRNA and LSU-rRNA
CAGL0L02871g		1.84	0.735391	3.5801	Ortholog(s) have role in ribosomal large subunit biogenesis and Noc1p-Noc2p complex, Noc2p-Noc3p complex, nucleoplasm, nucleus, preribosome, large subunit precursor localization
CAGL0H09614g		1.83554	0.200214	3.56905	Putative GPI-linked cell wall protein; similar to Sc TIR1
CAGL0E03245g		1.835	0.219203	3.56771	Ortholog(s) have RNA binding, nuclear localization sequence binding, single-stranded telomeric DNA binding activity; similar to Sc NSR1
CAGL0L05170g		1.835	0.318198	3.56771	Ortholog(s) have role in ribosomal large subunit biogenesis, ribosomal small subunit biogenesis and nucleolus localization
CAGL0H09592g		1.83386	0.387914	3.56491	Putative GPI-linked cell wall protein; similar to Sc TIR1
CAGL0G05742g		1.83	0.155563	3.55537	Ortholog(s) have rRNA binding, snoRNA binding activity, role in ribosomal small subunit biogenesis and 90S preribosome, nucleolus localization
CAGL0M10197g		1.82892	0.77695	3.55271	Ortholog(s) have role in nuclear-transcribed mRNA catabolic process, rRNA processing, ribosomal large subunit biogenesis, ribosomal large subunit export from nucleus
CAGL0B00792g		1.82619	0.484947	3.54599	Ortholog(s) have RNA binding activity, role in regulation of translation and cytoplasmic stress granule, polysome localization
CAGL0J11066g		1.825	0.473762	3.54307	Ortholog(s) have chromatin binding activity and role in DNA replication initiation, pre-replicative complex assembly involved in nuclear cell cycle DNA replication, rRNA processing, ribosomal large subunit biogenesis
CAGL0L10890g		1.825	0.756604	3.54307	Ortholog(s) have role in chromosome organization, protein-RNA complex remodeling, ribosomal large subunit biogenesis and PeBoW complex, nucleolus, preribosome, large subunit precursor localization
CAGL0M12122g		1.82195	0.721874	3.53559	Ortholog(s) have GTP binding activity, role in cytoplasmic translation, positive regulation of cellular response to amino acid starvation and cytoplasmic stress granule, polysome localization
CAGL0G07535g		1.82165	0.801686	3.53485	Ortholog(s) have single-stranded RNA binding activity
CAGL0E01881g	Yps11	1.82	0.509117	3.53081	Aspartic protease
CAGL0I06006g		1.8178	0.681849	3.52542	Ortholog(s) have RNA polymerase I activity, role in nucleolar large rRNA transcription by RNA polymerase I, transcription elongation from RNA polymerase I promoter and RNA polymerase I complex,
CAGL0D01265g	MT-I	1.815	0.304056	3.5186	Copper-binding metallothionein
CAGL0K08360g		1.80951	0.786108	3.50524	Ortholog(s) have double-stranded DNA 5'-3' exodeoxyribonuclease activity, single-stranded DNA endodeoxyribonuclease activity, tRNA (m5U54) methyltransferase activity and role in tRNA modification
CAGL0A01023g		1.805	0.615183	3.49429	Ortholog(s) have nicotinamide-nucleotide adenylyltransferase activity and role in NAD biosynthetic process; ortholog of Sc Nma1
CAGL0A03652g		1.795	0.615183	3.47015	Ortholog(s) have role in maturation of 5.8S rRNA from tricistronic rRNA transcript (SSU-rRNA, 5.8S rRNA, LSU-rRNA), maturation of LSU-rRNA from tricistronic rRNA transcript (SSU-rRNA, 5.8S rRNA and LSU-rRNA)
CAGL0A01716g		1.795	0.898026	3.47015	Ortholog(s) have nicotinamidase activity; ortholog of ScPnc1
CAGL0G01716g		1.795	0.388909	3.47015	Has domain(s) with predicted ATP binding, protein kinase activity, protein tyrosine kinase activity and role in protein phosphorylation
CAGL0M09845g		1.79499	0.919829	3.47014	Ortholog(s) have role in rRNA processing and Pwp2p-containing subcomplex of 90S preribosome, nucleolus, small-subunit processome localization
CAGL0M12793g		1.79	0.975807	3.45815	Unknown function
CAGL0F04983g		1.78161	0.826735	3.4381	Ortholog(s) have DNA helicase activity, DNA/RNA helicase activity, RNA helicase activity, role in maturation of LSU-rRNA from tricistronic rRNA transcript (SSU-rRNA, 5.8S rRNA, LSU-rRNA) and nucleolus localization
CAGL0L00341g		1.78078	0.558217	3.43611	Ortholog(s) have role in nuclear division, rRNA processing, ribosomal large subunit biogenesis and nuclear periphery, nucleolus, preribosome, large subunit precursor localization
CAGL0I04730g	HMT1	1.78	0.692965	3.43426	Putative hnRNP arginine N-methyltransferase
CAGL0J10032g		1.77634	0.715552	3.42555	Ortholog(s) have rRNA (cytosine-C5-)-methyltransferase activity
CAGL0J02222g		1.77535	0.958903	3.4232	Unknown function
CAGL0I03366g		1.775	0.205061	3.42238	Ortholog(s) have ATPase, adenylate kinase activity and role in cellular response to oxidative stress, maturation of SSU-rRNA from tricistronic rRNA transcript (SSU-rRNA, 5.8S rRNA, LSU-rRNA)
CAGL0K01551g		1.775	0.813173	3.42238	Ortholog(s) have role in assembly of large subunit precursor of preribosome, maturation of 5.8S rRNA from tricistronic rRNA transcript (SSU-rRNA, 5.8S rRNA and LSU-rRNA)
Cgla_YGOB_Anc_7.478		1.775	1.1243	3.42238	Unknown function
CAGL0B01122g	SAM1	1.77	1.21622	3.41054	S-adenosylmethionine synthetase
CAGL0H04851g		1.77	0.367696	3.41054	Ortholog(s) have protein serine/threonine phosphatase activity; similar to ScPpz1
CAGL0K02211g		1.77	0.353553	3.41054	Ortholog(s) have role in endonucleolytic cleavage in 5'-ETS of tricistronic rRNA transcript (SSU-rRNA, 5.8S rRNA and LSU-rRNA
CAGL0H02563g		1.765	1.05359	3.39874	Unknown function
CAGL0L06314g		1.765	0.784888	3.39874	Ortholog(s) have role in ribosomal large subunit export from nucleus and cytoplasm, nucleolus, nucleoplasm, nucleus, preribosome, large subunit precursor localization
CAGL0J03718g		1.7557	0.774786	3.37691	Ortholog(s) have pseudouridine synthase activity, role in enzyme-directed rRNA pseudouridine synthesis, mRNA pseudouridine synthesis, snRNA pseudouridine synthesis, tRNA pseudouridine synthesis and cytoplasm, nucleus localization
CAGL0F08129g	SDA1	1.75	0.325269	3.36359	Ortholog(s) have role in actin cytoskeleton organization, ribosomal large subunit biogenesis, ribosomal large subunit export from nucleus, traversing start control point of mitotic cell cycle and nucleus localization
CAGL0K10428g		1.75	2.26274	3.36359	Ortholog(s) have enzyme inhibitor activity and role in negative regulation of glycogen catabolic process
CAGL0I10010g		1.74747	-0.269489	3.3577	Ortholog(s) have SNARE binding, chaperone binding, protein sequestering activity
CAGL0E02937g		1.74667	0.686518	3.35584	Unknown function
CAGL0D02706g		1.74214	0.299699	3.3453	Ortholog(s) have chromatin binding activity
CAGL0G04411g		1.7416	0.696467	3.34405	Ortholog(s) have U3 snoRNA binding activity
CAGL0C04191g		1.72	0.763675	3.29436	Ortholog(s) have succinate-semialdehyde dehydrogenase [NAD(P)+] activity and role in cellular response to oxidative stress, gamma-aminobutyric acid catabolic process.
CAGL0D05874g		1.71806	0.923831	3.28993	Ortholog(s) have role in endonucleolytic cleavage in 5'-ETS of tricistronic rRNA transcript (SSU-rRNA, 5.8S rRNA and LSU-rRNA)
CAGL0D05236g		1.71796	0.123494	3.28971	Has domain(s) with predicted nucleic acid binding, nucleotide binding activity
CAGL0K02387g		1.715	0.643467	3.28297	Has domain(s) with predicted ATP binding, helicase activity, nucleic acid binding activity
CAGL0A01089g		1.71	0.509117	3.27161	Has domain(s) with predicted alcohol O-acetyltransferase activity and role in alcohol metabolic process
CAGL0J09284g		1.71	0.452548	3.27161	Ortholog of S. cerevisiae YDL129W
CAGL0M01760g	CDR1	1.71	0.325269	3.27161	Multidrug transporter of ATP-binding cassette (ABC) superfamily, involved in resistance to azoles; expression regulated by Pdr1p; increased abundance in azole resistant strains	5
CAGL0E05500g		1.705	0.869741	3.26029	Ortholog(s) have RNA polymerase I activity, promoter-specific chromatin binding activity and role in nucleolar large rRNA transcription by RNA polymerase I, transcription by RNA polymerase I
CAGL0I00418g		1.7	0.721249	3.24901	Ortholog(s) have electron transfer activity, stearoyl-CoA 9-desaturase activity and role in mitochondrion inheritance, response to ethanol, unsaturated fatty acid biosynthetic process; similar to Sc OLE1
CAGL0I07931g		1.69431	0.966686	3.23622	Ortholog(s) have role in rRNA processing, ribosomal large subunit assembly
CAGL0C05181g		1.69427	0.597739	3.23613	Ortholog(s) have ribose phosphate diphosphokinase activity, role in 5-phosphoribose 1-diphosphate biosynthetic process
CAGL0C00759g		1.685	0.417193	3.2154	Ortholog(s) have transcription coactivator activity, role in chromatin silencing at telomere, positive regulation of ribosomal protein gene transcription by RNA polymerase II and CURI complex, nucleolus, nucleus localization
CAGL0I03608g		1.685	0.558614	3.2154	Ortholog(s) have role in endonucleolytic cleavage in 5'-ETS of tricistronic rRNA transcript
CAGL0I09592g		1.685	0.176777	3.2154	Ortholog(s) have carbamoyl-phosphate synthase (glutamine-hydrolyzing) activity, role in arginine biosynthetic process and carbamoyl-phosphate synthase complex, cytoplasmic stress granule localization
CAGL0L02981g		1.685	0.247487	3.2154	Ortholog(s) have role in spliceosomal complex disassembly and U2-type post-mRNA release spliceosomal complex, spliceosomal complex localization
CAGL0E03289g		1.675	0.572756	3.19319	Ortholog(s) have ATPase activator activity, RNA binding activity
CAGL0I01826g		1.675	0.431335	3.19319	Ortholog(s) have snoRNA binding activity, role in rRNA processing, ribosomal small subunit biogenesis and Mpp10 complex, small-subunit processome localization
CAGL0L03025g		1.67	0.721249	3.18215	Ortholog(s) have RNA polymerase III activity, role in tRNA transcription by RNA polymerase III and RNA polymerase III complex localization
CAGL0C04785g		1.67	0.367696	3.18215	Ortholog of Sc YJR115W
CAGL0K03795g		1.67	0.537401	3.18215	Ortholog(s) have RNA helicase activity, role in maturation of SSU-rRNA from tricistronic rRNA transcript (SSU-rRNA, 5.8S rRNA, LSU-rRNA), ribosome biogenesis and nucleolus
CAGL0G05269g		1.67	0.339411	3.18215	Putative mitochondrial protein
CAGL0F04103g		1.66849	0.612008	3.17881	Unknown function; Orthologue of Sc YBL028C
CAGL0M06897g		1.66758	0.698527	3.17681	Unknown function
CAGL0M03905g		1.66733	1.06465	3.17626	Ortholog(s) have role in endonucleolytic cleavage in ITS1 to separate SSU-rRNA from 5.8S rRNA and LSU-rRNA from tricistronic rRNA transcript
CAGL0L02893g		1.66342	0.879463	3.16767	Ortholog(s) have role in maturation of SSU-rRNA
CAGL0D05060g		1.66288	0.239813	3.16647	Has domain(s) with predicted hydrolase activity
CAGL0E01925g		1.66181	0.935622	3.16413	Ortholog(s) have tRNA (guanine-N2-)-methyltransferase activity, role in tRNA methylation and cytoplasm, tRNA (m2G10) methyltransferase complex localization
CAGL0J10912g		1.655	0.487904	3.14923	Has domain(s) with predicted ATP binding, helicase activity, nucleic acid binding activity
CAGL0I01606g		1.65398	0.707064	3.147	Ortholog(s) have role in rRNA metabolic process, ribosome biogenesis and nucleolus localization
CAGL0L08976g		1.65018	0.929593	3.13872	Has domain(s) with predicted ATP binding, helicase activity, nucleic acid binding activity
CAGL0M13739g	ATM1	1.65018	0.653821	3.13872	Ortholog(s) have ATPase-coupled transmembrane transporter activity, role in iron import into the mitochondrion, iron-sulfur cluster assembly and mitochondrial inner membrane
CAGL0H03773g		1.65	0.848528	3.13834	Ortholog(s) have rRNA primary transcript binding activity
CAGL0E00341g	MTL1a	1.65	0.989949	3.13834	Mating type protein a1
CAGL0E02343g		1.65	0.66468	3.13834	Ortholog(s) have endoribonuclease activity, enzyme activator activity
CAGL0H02057g		1.6474	0.715406	3.13268	Ortholog(s) have box H/ACA snoRNA binding activity, role in snRNA pseudouridine synthesis and box H/ACA snoRNP complex, nucleolus localization
CAGL0M07678g		1.64714	0.718926	3.13213	Ortholog(s) have role in maturation of SSU-rRNA, ribosomal small subunit biogenesis and 90S preribosome, nucleus localization
CAGL0G06182g		1.645	0.26163	3.12748	Unknown function; orthologue of S. cerevisiae YHR131C
CAGL0E00979g		1.64005	0.578154	3.11677	Ortholog(s) have tRNA (guanine-N7-)-methyltransferase activity, role in tRNA (guanine-N7)-methylation and cytosol, nucleus, tRNA (m7G46) methyltransferase complex localization
CAGL0K09042g		1.64	0.721249	3.11666	Unknown function; orthologue of S. cerevisiae : TMA16
CAGL0M13915g		1.63603	1.17419	3.10809	Unknown function; Orthologue of Sc YMR310C
CAGL0J04576g		1.635	0.657609	3.10588	Has domain(s) with predicted role in peptidyl-diphthamide biosynthetic process from peptidyl-histidine and cytoplasm localization
CAGL0K09284g		1.635	0.685894	3.10588	Ortholog(s) have role in endonucleolytic cleavage in 5'-ETS of tricistronic rRNA transcript (SSU-rRNA, 5.8S rRNA and LSU-rRNA)
CAGL0M04829g		1.635	0.855599	3.10588	Has domain(s) with predicted RNA binding activity, role in RNA processing and intracellular anatomical structure localization
CAGL0B00484g		1.63462	0.736165	3.10505	Ortholog(s) have rRNA (guanine) methyltransferase activity, rRNA (uridine-2'-O-)-methyltransferase activity
CAGL0C01419g		1.63	0.424264	3.09513	Ortholog(s) have RNA binding, mRNA binding, poly(U) RNA binding activity
CAGL0J07700g		1.625	0.13435	3.08442	Ortholog(s) have role in mRNA splicing, via spliceosome and U2-type spliceosomal complex localization
CAGL0L05500g		1.625	0.502046	3.08442	Ortholog(s) have role in ribosomal large subunit biogenesis and cytoplasm, nucleus localization
CAGL0M09977g		1.625	0.671751	3.08442	Ortholog(s) have tRNA dihydrouridine synthase activity, role in tRNA modification and nuclear periphery localization
CAGL0L11176g		1.62336	0.195307	3.08092	Ortholog(s) have oxidized purine nucleobase lesion DNA N-glycosylase activity and role in DNA repair, base-excision repair, AP site formation, error-free translesion synthesis, telomere maintenance via telomerase
CAGL0J00473g		1.62	0.59397	3.07375	Ortholog(s) have large ribosomal subunit rRNA binding, proteasome binding, protein-macromolecule adaptor activity, rRNA binding activity
CAGL0I02398g		1.62	0.650538	3.07375	Ortholog(s) have large ribosomal subunit rRNA binding, ribosomal large subunit binding activity, role in ribosomal large subunit export from nucleus and cytosol localization
CAGL0J01265g		1.61727	0.583571	3.06795	Ortholog(s) have U3 snoRNA binding activity and role in maturation of SSU-rRNA from tricistronic rRNA transcript (SSU-rRNA, 5.8S rRNA, LSU-rRNA), positive regulation of transcription by RNA polymerase I
CAGL0K01859g		1.615	0.756604	3.06312	Ortholog(s) have histone-glutamine methyltransferase activity, mRNA binding, rRNA methyltransferase activity and role in box C/D RNA 3'-end processing, histone glutamine methylation, rRNA methylation, rRNA processing, sno(s)RNA processing
CAGL0M14091g		1.615	0.0636396	3.06312	Putative quinone reductase/NADPH dehydrogenase
CAGL0G08041g		1.6117	0.158023	3.05611	Ortholog(s) have iron ion binding activity and role in positive regulation of translation, ribosomal large subunit biogenesis, ribosomal subunit export from nucleus, ribosome disassembly, translational initiation, translational termination
CAGL0M04719g		1.61	0.311127	3.05252	Ortholog(s) have role in cleavage involved in rRNA processing, maturation of SSU-rRNA from tricistronic rRNA transcript (SSU-rRNA, 5.8S rRNA, LSU-rRNA), ribosomal small subunit biogenesis and 90S preribosome, nucleolus localization
CAGL0M11154g		1.61	0.622254	3.05252	Unknown function
CAGL0E02585g		1.60967	0.944955	3.05182	Ortholog(s) have 3'-5'-exoribonuclease activity, exoribonuclease activity, rRNA primary transcript binding activity
CAGL0C03289g		1.605	0.26163	3.04196	Putative ABC transporter involved in bile acid transport
CAGL0M11638g		1.605	0.190919	3.04196	Ortholog(s) have 3'-5'-exoribonuclease activity
CAGL0A01782g	HXT4	1.60476	1.08571	3.04145	Ortholog(s) have glucose transmembrane transporter activity, pentose transmembrane transporter activity and plasma membrane localization
CAGL0D00550g		1.60367	0.862697	3.03915	Ortholog(s) have ribose phosphate diphosphokinase activity and role in 5-phosphoribose 1-diphosphate biosynthetic process, cytokinesis, fungal-type cell wall organization
CAGL0C01639g		1.595	0.615183	3.02095	Ortholog(s) have snoRNA binding activity
CAGL0E01859g	YPS10	1.595	0.0212132	3.02095	Aspartic protease
CAGL0A04037g		1.59087	0.386499	3.01231	Ortholog(s) have role in rRNA processing
CAGL0J10010g		1.59	0.763675	3.01049	Ortholog(s) have tRNA (adenine-N1-)-methyltransferase activity, role in tRNA methylation and nucleus, tRNA (m1A) methyltransferase complex localization
CAGL0L09669g		1.5886	0.655907	3.00757	Ortholog(s) have role in maturation of 5.8S rRNA from tricistronic rRNA transcript
CAGL0L13068g		1.58644	0.436105	3.00307	Ortholog(s) have diacylglycerol cholinephosphotransferase activity
CAGL0J09460g		1.58576	0.68462	3.00165	Ortholog(s) have polynucleotide adenylyltransferase activity
CAGL0G03905g		1.585	1.13844	3.00008	iron-sulfur transferase activity
CAGL0L10142g	RSB1	1.58	1.73948	2.9897	Putative sphingolipid flippase
CAGL0L04114g		1.57903	1.17151	2.98768	Ortholog(s) have RNA binding activity
CAGL0L03872g		1.57589	0.940375	2.98119	Ortholog(s) have DNA-directed 5'-3' RNA polymerase activity, RNA polymerase I activity, RNA polymerase III activity
CAGL0J06666g		1.57557	0.592449	2.98052	Unknown function; Ortholog of Sc YML108W
CAGL0K02519g		1.575	0.219203	2.97935	Unknown function
CAGL0B01595g		1.575	1.08187	2.97935	Unknown function
CAGL0J03476g		1.57	0.834386	2.96905	Ortholog(s) have role in protein-RNA complex remodeling, ribosomal large subunit assembly and nucleolus localization
CAGL0H05709g		1.57	0.452548	2.96905	Ortholog(s) have role in assembly of large subunit precursor of preribosome, rRNA processing
CAGL0L12892g		1.57	0.636396	2.96905	Ortholog(s) have role in actin cytoskeleton organization, inositol lipid-mediated signaling, negative regulation of phospholipid translocation
CAGL0D05434g	ROX1	1.5692	0.573401	2.9674	Protein involved in regulation of ergosterol biosynthesis
CAGL0B01012g		1.56583	-0.312798	2.96047	Ortholog(s) have L-proline transmembrane transporter activity
CAGL0L11660g		1.56479	0.52886	2.95834	Ortholog(s) have RNA polymerase III activity
CAGL0J11154g		1.56	0.325269	2.94854	Ortholog(s) have nucleolus, preribosome localization
CAGL0L11638g		1.56	0.763675	2.94854	Unknown function
CAGL0F07645g		1.55558	0.957489	2.93952	Ortholog(s) have role in endonucleolytic cleavage in 5'-ETS of tricistronic rRNA transcript
CAGL0L11594g		1.55213	0.979093	2.9325	Ortholog(s) have protein kinase activity
CAGL0K02541g		1.55007	0.792693	2.92832	Has domain(s) with predicted magnesium ion binding, ribose phosphate diphosphokinase activity and role in nucleoside metabolic process, nucleotide biosynthetic process
CAGL0F01023g		1.55	0.735391	2.92817	Ortholog(s) have rRNA binding activity, role in maturation of LSU-rRNA from tricistronic rRNA transcript
CAGL0H09724g		1.55	0.636396	2.92817	Ortholog(s) have GTPase activity, RNA binding activity and role in maturation of LSU-rRNA from tricistronic rRNA transcript
CAGL0J07766g		1.55	0.678822	2.92817	Ortholog(s) have RNA polymerase I activity and role in nucleolar large rRNA transcription by RNA polymerase I, transcription by RNA polymerase I, transcription elongation from RNA polymerase I promoter
CAGL0M04279g		1.545	0.671751	2.91804	Unknown function
CAGL0I09350g		1.545	0.360624	2.91804	Ortholog(s) have role in budding cell bud growth, mitotic cell cycle, nucleocytoplasmic transport, ribosomal large subunit biogenesis and cytoplasm, preribosome,
CAGL0J01045g		1.54	0.749533	2.90795	Ortholog(s) have ATP-dependent activity, acting on RNA, RNA helicase activity,
CAGL0M08426g		1.54	0.0989949	2.90795	Putative protein; contains an ARS in its promoter	3
CAGL0M09801g		1.53787	0.708313	2.90366	Ortholog(s) have N-terminal protein N-methyltransferase activity, S-adenosylmethionine-dependent methyltransferase activity, protein-lysine N-methyltransferase activity
CAGL0K10362g		1.53538	0.676517	2.89864	Ortholog(s) have L-ornithine transmembrane transporter activity, role in arginine biosynthetic process, mitochondrial L-ornithine transmembrane transport and mitochondrial envelope localization
CAGL0F02541g		1.535	0.417193	2.89788	Ortholog(s) have role in maturation of SSU-rRNA from tricistronic rRNA transcript
CAGL0I06490g		1.53204	0.731839	2.89195	Ortholog(s) have role in ribosomal large subunit biogenesis
CAGL0A01694g		1.53	0.721249	2.88786	Unknown function; Ortholog of Sc YGL036W
CAGL0M13519g		1.53	0.79196	2.88786	Ortholog(s) have ATP-dependent activity, acting on RNA, RNA binding, RNA helicase activity
CAGL0I01254g		1.52873	0.692028	2.88532	Ortholog(s) have URM1 activating enzyme activity, nitrate reductase (NADPH) activity, protein adenylyltransferase activity, sulfurtransferase activity, thiosulfate sulfurtransferase activity
CAGL0D03124g		1.525	0.615183	2.87787	Has domain(s) with predicted ATP binding, helicase activity, nucleic acid binding activity
CAGL0K04301g		1.525	0.0636396	2.87787	Putative mitochondrial Ser/Thr protein kinase; similar to Sc FMP48
CAGL0K10164g		1.525	1.56271	2.87787	Predicted adhesin
CAGL0B04169g		1.525	0.572756	2.87787	Ortholog(s) have rRNA primary transcript binding activity
CAGL0I03344g		1.525	0.205061	2.87787	Ortholog(s) have cytoplasmic stress granule localization
CAGL0J08844g		1.51	0.558614	2.84817	Has domain(s) with predicted small-subunit processome localization
CAGL0J11286g		1.51713	0.765207	2.86222	Ortholog(s) have chromatin binding activity
CAGL0E05676g		1.51552	0.443957	2.85901	Ortholog(s) have role in wybutosine biosynthetic process
CAGL0J04598g		1.515	0.784888	2.85799	Ortholog(s) have dihydroorotase activity and role in 'de novo' pyrimidine nucleobase biosynthetic process; similar to Sc Ura4
CAGL0F06853g		1.51323	1.03072	2.85448	Ortholog(s) have protein kinase inhibitor activity, role in regulation of actin cytoskeleton organization, regulation of microtubule cytoskeleton organization, ribosome biogenesis and nucleolar preribosome
CAGL0D04884g		1.51	0.551543	2.8481	Ortholog(s) have U3 snoRNA binding activity
CAGL0J00957g		1.51	0.311127	2.8481	Ortholog(s) have ATPase activator activity, role in assembly of large subunit precursor of preribosome, ribosomal large subunit biogenesis and nucleolus
CAGL0J05698g		1.51	0.212132	2.8481	Ortholog(s) have RNA polymerase III activity, role in tRNA transcription by RNA polymerase III,
CAGL0J00891g		1.50928	0.790876	2.84669	Unknown function
CAGL0K09416g		1.50677	0.613094	2.84173	Ortholog(s) have tRNA binding activity
CAGL0J05412g		1.50556	0.69106	2.83935	Ortholog(s) have role in ribosomal large subunit assembly, ribosomal subunit export from nucleus and cytoplasm, cytosolic large ribosomal subunit localization
CAGL0K06215g		1.505	0.657609	2.83825	Ortholog(s) have U3 snoRNA binding activity
CAGL0L03846g		1.505	0.813173	2.83825	Ortholog(s) have ATP-dependent activity
CAGL0D00880g		1.505	0.869741	2.83825	Ortholog(s) have ribonucleoprotein complex binding activity
CAGL0E03069g		1.5	0.777817	2.82843	Ortholog(s) have role in maturation of SSU-rRNA from tricistronic rRNA transcript
CAGL0D05500g		1.49973	0.665937	2.8279	Ortholog(s) have translation elongation factor binding activity and role in chaperone-mediated protein folding
CAGL0K01991g		1.49947	0.387668	2.8274	Ortholog(s) have tRNA (cytosine-5-)-methyltransferase activity and role in tRNA methylation
CAGL0M08514g	PIR5	1.49758	-0.483135	2.82369	Pir protein family member, putative cell wall component
CAGL0K07007g		1.495	0.0777817	2.81864	Ortholog(s) have role in aerobic respiration and P-body
CAGL0J11088g		1.495	0.0919239	2.81864	Unknown function
CAGL0A04257g		1.49048	0.491104	2.80983	Ortholog(s) have sequence-specific DNA binding activity and role in regulation of transcription by RNA polymerase II
CAGL0C03369g		1.49	0.367696	2.80889	Ortholog(s) have large ribosomal subunit rRNA binding activity and role in regulation of ribosomal subunit export from nucleus, ribosomal large subunit export from nucleus
CAGL0E02321g		1.49	0.226274	2.80889	Putative phospholipase B
CAGL0G06248g		1.49	0.721249	2.80889	Ortholog(s) have role in maturation of 5.8S rRNA from tricistronic rRNA transcript
CAGL0I09724g		1.49	0.537401	2.80889	Has domain(s) with predicted transmembrane transporter activity, similar to Sc Mch5
CAGL0J02376g		1.49	0.721249	2.80889	Ortholog(s) have role in maturation of SSU-rRNA from tricistronic rRNA transcript
CAGL0J02816g		1.49	0.947523	2.80889	Ortholog(s) have ferrous iron binding, peptidyl-proline dioxygenase activity, poly(A) binding activity
CAGL0F00913g		1.48	0.410122	2.78949	Unknown function
CAGL0H06985g		1.48	0.622254	2.78949	Ortholog(s) have role in endonucleolytic cleavage in 5'-ETS of tricistronic rRNA transcript
CAGL0H04257g	MT-II	1.47574	0.554771	2.78126	Copper-binding metallothionein
CAGL0G07975g		1.475	0.403051	2.77984	Ortholog(s) have role in maturation of 5.8S rRNA from tricistronic rRNA transcript
CAGL0B00352g		1.475	0.643467	2.77984	Ortholog(s) have role in endonucleolytic cleavage in ITS1 to separate SSU-rRNA from 5.8S rRNA and LSU-rRNA from tricistronic rRNA transcript
CAGL0D00220g		1.47	0.39598	2.77022	Ortholog(s) have role in ribosomal large subunit export from nucleus and nucleolus, nucleus, preribosome, large subunit precursor localization
CAGL0I10560g		1.47	0.226274	2.77022	Ortholog(s) have U3 snoRNA binding, tRNA binding activity
CAGL0L00671g	FCY21	1.47	0.183848	2.77022	Purine-cytosine transporter
CAGL0M13167g		1.47	0.707107	2.77022	Ortholog(s) have protein serine/threonine kinase activity
CAGL0L05720g		1.47	0.410122	2.77022	Unknown function
CAGL0I03630g		1.46921	0.688736	2.7687	Ortholog(s) have RNA polymerase III activity, role in tRNA transcription by RNA polymerase III and RNA polymerase III complex localization
CAGL0L02849g		1.46911	0.918377	2.76851	Ortholog(s) have RNA polymerase III activity, role in tRNA transcription by RNA polymerase III and RNA polymerase III complex localization
CAGL0E05874g		1.465	0.558614	2.76063	Ortholog(s) have GTP binding, GTPase activity, U3 snoRNA binding activity
CAGL0L09273g		1.465	1.08187	2.76063	Ortholog(s) have isocitrate lyase activity; similar to Sc Icl2
CAGL0E05764g		1.465	0.459619	2.76063	Ortholog(s) have pseudouridine synthase activity, role in mRNA pseudouridine synthesis, snRNA pseudouridine synthesis, tRNA pseudouridine synthesis and nucleus localization
CAGL0G02783g		1.465	0.304056	2.76063	Ortholog(s) have unfolded protein binding activity, role in box H/ACA snoRNP assembly and cytosol,
CAGL0M03751g		1.465	0.275772	2.76063	Ortholog(s) have RNA adenylyltransferase activity
CAGL0I07051g		1.46	0.0707107	2.75108	Ortholog(s) have cyclin-dependent protein serine/threonine kinase regulator activity, role in positive regulation of macroautophagy
CAGL0J10890g		1.46	0.537401	2.75108	Ortholog(s) have rRNA binding activity, role in ribosomal large subunit assembly and nucleolus localization
CAGL0M01210g		1.46	0.707107	2.75108	Ortholog(s) have role in rRNA processing and Rix1 complex localization
CAGL0K03157g	DUR31	1.46	0.353553	2.75108	Putative plasma membrane polyamine transporter
CAGL0L04664g	HEM15	1.45839	-0.311817	2.74802	role in heme biosynthetic process
CAGL0F07139g		1.34289	0.530399	2.5447	Ortholog(s) have RNA helicase activity
CAGL0M11110g		1.45745	0.517277	2.74622	Ortholog(s) have role in rRNA processing and preribosome, large subunit precursor localization
CAGL0J09746g		1.45619	0.699363	2.74383	Ortholog(s) have tRNA (guanine-N7-)-methyltransferase activity
CAGL0I04290g		1.455	0.318198	2.74157	Ortholog(s) have N(6)-L-threonylcarbamoyladenine synthase activity, single-stranded telomeric DNA binding activity
CAGL0A01628g	MIG1	1.45	0.113137	2.73208	Transcriptional regulatory protein
CAGL0G00924g	GLM5	1.45	0.551543	2.73208	Unknown function
CAGL0F07117g		1.45	0.876812	2.73208	Putative subunit of the heterotrimeric G protein
CAGL0D03674g		1.44991	0.654851	2.73191	Ortholog(s) have ATP binding, ATPase, ribosome binding, translation termination factor activity and role in poly(A)+ mRNA export from nucleus, regulation of translational termination, ribosomal small subunit biogenesis
CAGL0F06523g		1.44966	0.47029	2.73144	Has domain(s) with predicted ATP binding, helicase activity, nucleic acid binding, nucleoside-triphosphatase activity, nucleotide binding activity
CAGL0C00737g		1.44937	0.673825	2.7309	Ortholog(s) have U3 snoRNA binding activity
CAGL0B01232g	EMG1	1.44932	0.472049	2.73079	Ortholog(s) have rRNA (pseudouridine) methyltransferase activity
CAGL0M09757g		1.44857	1.0377	2.72937	Unknown function; similar to Sc YLR287C
CAGL0B01397g	NOP8	1.445	0.53033	2.72263	Putative nucleolar protein required for ribosome biogenesis;
CAGL0C00275g	HSP31	1.445	0.968736	2.72263	Putative cysteine protease;
CAGL0H07183g		1.44199	0.318047	2.71695	Unknown function; Has domain(s) with predicted transferase activity
CAGL0D00836g		1.44191	1.09334	2.7168	Ortholog(s) have unfolded protein binding activity and role in protein import into nucleus, ribosomal large subunit biogenesis
CAGL0K12144g	FES1	1.44	0.410122	2.71321	Putative Hsp70p nucleotide exchange factor
CAGL0L08756g		1.44	0.66468	2.71321	Ortholog(s) have role in maturation of SSU-rRNA from tricistronic rRNA transcript
CAGL0L12254g		1.44	0.127279	2.71321	Ortholog(s) have L-alanine:2-oxoglutarate aminotransferase activity, role in alanine biosynthetic process
CAGL0I02574g	OYE2	1.44	0.961665	2.71321	Ortholog(s) have NADPH dehydrogenase activity
CAGL0G04983g		1.43565	0.648234	2.70504	Unknown function; Ortholog of Sc YLR363W-A
CAGL0G01991g		1.43295	0.67307	2.69998	Unknown function
CAGL0H02079g		1.42933	0.850436	2.69321	Ortholog(s) have rRNA primary transcript binding activity
CAGL0I02376g		1.42617	0.514253	2.68733	Has domain(s) with predicted role in ribosomal small subunit biogenesis and 90S preribosome localization
CAGL0H09504g		1.42577	0.647779	2.68657	Ortholog(s) have oxygen-dependent protoporphyrinogen oxidase activity, role in heme biosynthetic process
CAGL0B01881g		1.42077	0.142769	2.67728	Ortholog(s) have tRNA (guanine-N2-)-methyltransferase activity, role in tRNA N2-guanine methylation, tRNA methylation
CAGL0D00682g		1.41896	1.32739	2.67393	Has domain(s) with predicted nucleic acid binding activity
CAGL0F02299g		1.41628	0.647966	2.66896	Ortholog(s) have mRNA binding activity
CAGL0I09152g		1.41212	0.966745	2.66129	Ortholog(s) have RNA binding, rRNA primary transcript binding,
CAGL0D05588g		1.40816	0.780537	2.65398	Ortholog(s) have role in maturation of SSU-rRNA from tricistronic rRNA transcript
CAGL0D06512g		1.40081	0.783933	2.64049	Putative membrane bound guanine nucleotide exchange factor;	1
CAGL0I09790g		1.39667	0.554493	2.63293	Ortholog(s) have role in endonucleolytic cleavage in 5'-ETS of tricistronic rRNA transcript
CAGL0I08613g	DUR3	1.39456	0.897754	2.62908	Putative plasma membrane polyamine transporter
CAGL0F01111g		1.3919	1.43102	2.62424	Ortholog(s) have role in inositol metabolic process
CAGL0K07205g		1.38928	1.10128	2.61948	Unknown function
CAGL0K08888g		1.38887	0.4791	2.61873	Ortholog(s) have guanyl-nucleotide exchange factor activity, translation initiation factor activity
CAGL0M10527g		1.3808	0.579066	2.60412	Unknown function
CAGL0B00220g		1.37873	0.521251	2.6004	Has domain(s) with predicted rRNA (pseudouridine) methyltransferase activity and role in rRNA base methylation
CAGL0J00275g		1.37556	0.920756	2.59468	Ortholog(s) have exosome (RNase complex) localization
CAGL0A04213g		1.37533	0.105968	2.59426	Ortholog(s) have role in DNA damage checkpoint signaling, G2/M transition of mitotic cell cycle and cytoplasm localization
CAGL0M01276g		1.37477	1.26287	2.59327	Ortholog(s) have double-stranded DNA helicase activity, role in mitochondrial DNA metabolic process
CAGL0M02805g		1.37268	0.492652	2.58952	Unknown function
CAGL0J00869g		1.35232	0.968802	2.55323	Has domain(s) with predicted DNA binding, DNA-directed 5'-3' RNA polymerase activity and role in transcription
CAGL0G02761g		1.34724	1.083	2.54424	Ortholog(s) have role in peptidyl-diphthamide biosynthetic process from peptidyl-histidine
CAGL0H10406g		1.34486	0.466561	2.54006	Ortholog(s) have tRNA (guanine) methyltransferase activity and role in tRNA methylation
CAGL0G01056g	GAS3	1.34401	0.78892	2.53857	Putative glycoside hydrolase of the Gas/Phr family
CAGL0A04015g		1.34309	0.629761	2.53694	Ortholog(s) have role in rRNA processing
CAGL0I03234g		1.34226	0.566484	2.53547	Ortholog(s) have RNA binding, U3 snoRNA binding, U4 snRNA binding activity
CAGL0K02497g	TIF6	1.34175	0.451424	2.53459	Translation initiation factor 6
CAGL0D02838g		1.33948	0.675728	2.5306	Ortholog(s) have role in ribosomal large subunit biogenesis, ribosomal large subunit export from nucleus
CAGL0H08019g		1.33589	0.566491	2.5243	Ortholog(s) have protein kinase activity and role in maturation of SSU-rRNA from tricistronic rRNA transcript
CAGL0F02431g	ACO2	1.33541	-0.802483	2.52348	Ortholog(s) have role in mitochondrial translation, tricarboxylic acid cycle and cytoplasm,
CAGL0G03443g		1.33192	0.327324	2.51737	Ortholog(s) have nuclear localization sequence binding activity and role in NLS-bearing protein import into nucleus
CAGL0J09966g	YJD1	1.32906	0.319317	2.51238	Putative mitochondrial and ER import protein;
CAGL0L08206g		1.32844	0.640168	2.51131	Ortholog(s) have role in exonucleolytic trimming to generate mature 3'-end of 5.8S rRNA from tricistronic rRNA transcript
CAGL0F07865g	Upc2B	1.32835	0.914608	2.51116	Putative Zn(2)-Cys(6) binuclear cluster transcriptional regulator of ergosterol biosynthesis
CAGL0L10164g		1.32524	0.421178	2.50575	Ortholog(s) have role in translational termination and nucleus localization
CAGL0G03531g		1.31998	0.285174	2.49662	Unknown function; Ortholog of Sc SPR6
CAGL0H10384g		1.31858	0.684496	2.4942	Ortholog(s) have role in exonucleolytic trimming to generate mature 3'-end of 5.8S rRNA from tricistronic rRNA transcript
CAGL0B02431g		1.31807	0.0695085	2.49332	Ortholog(s) have NADH dehydrogenase (ubiquinone) activity, role in NADH oxidation
CAGL0G07018g		1.31727	-0.182652	2.49194	Unknown function
CAGL0J03740g		1.31086	-0.254261	2.48089	Ortholog(s) have role in ascospore formation, ascospore wall assembly, positive regulation of protein autophosphorylation and ascospore wall localization
CAGL0F07557g		1.31049	0.811244	2.48026	Ortholog(s) have first spliceosomal transesterification activity, role in generation of catalytic spliceosome for first transesterification step and U2-type catalytic step 1 spliceosome localization
CAGL0I07711g		1.30678	0.0240171	2.47389	Ortholog(s) have structural molecule activity, role in ascospore-type prospore membrane formation and meiotic spindle pole body localization
CAGL0H09064g	FUR1	1.30248	1.18389	2.46653	Putative uracil phosphoribosyltransferase
CAGL0E05522g		1.29835	0.217268	2.45947	Unknown function; Ortholog of Sc YOR342C
CAGL0D05016g		1.29593	0.487102	2.45535	Ortholog(s) have role in maturation of 5.8S rRNA from tricistronic rRNA transcript
CAGL0I07667g		1.29585	0.563167	2.45521	Orthologue is involved in tRNA methylation
CAGL0H02189g		1.29528	0.658039	2.45425	Ortholog(s) have role in ribosomal small subunit biogenesis and nucleolus localization
CAGL0D02640g		1.29464	-0.056332	2.45315	Has domain(s) with predicted transmembrane transporter activity, ortholog of Sc Hxt2
CAGL0A01584g		1.2939		2.45191	Ortholog(s) have cell adhesion molecule binding activity
CAGL0F07095g		1.29297	0.877525	2.45032	Ortholog(s) have 5S rRNA binding, 7S RNA binding, poly(A) binding, ribonuclease P RNA binding,
CAGL0F04433g	URA7	1.28875	0.258187	2.44316	CTP synthase
CAGL0L11770g		1.28755	0.713023	2.44114	Ortholog(s) have ATP-dependent activity, acting on DNA, DNA binding, chromatin DNA binding, methylated histone binding, nucleosome-dependent ATPase activity
CAGL0C02101g		1.28701	0.812493	2.44021	Ortholog(s) have role in (1->6)-beta-D-glucan biosynthetic process
CAGL0B01265g	MATalpha2	1.2858	0.855641	2.43816	Mating-type regulatory protein alpha2;
CAGL0B04433g		1.27652	1.05086	2.42255	Has domain(s) with predicted nucleobase transmembrane transporter activity; similar to Sc Fur4
CAGL0M05269g		1.26349	-0.04858	2.40075	Unknown function
CAGL0C02343g	ARB1	1.26135	0.178162	2.39719	Ortholog(s) have ATPase activity, role in ribosomal small subunit export from nucleus
CAGL0H07975g		1.25764	0.353782	2.39104	Ortholog(s) have RNA binding, RNA strand annealing activity, tRNA binding activity, role in tRNA 3'-trailer cleavage, tRNA 3'-trailer cleavage, endonucleolytic, tRNA folding, tRNA processing
CAGL0E00363g		1.25299	0.532224	2.38335	Has domain(s) with predicted rRNA (pseudouridine) methyltransferase activity and role in rRNA base methylation
CAGL0K09614g		1.25004	0.454818	2.37848	Ortholog(s) have rRNA cytidine N-acetyltransferase activity, snoRNA binding, tRNA binding activity and role in mRNA modification, rRNA acetylation involved in maturation of SSU-rRNA
CAGL0I08393g	TIF3	1.24742	0.478758	2.37417	Translation initiation factor eIF4B
CAGL0K05555g		1.24307	0.749337	2.36702	Ortholog(s) have U3 snoRNA binding activity
CAGL0M03487g		1.24219	-0.000807604	2.36557	Ortholog(s) have RNA polymerase III activity
CAGL0L02827g		1.24056	1.5438	2.36291	Ortholog(s) have protein tyrosine phosphatase activity,
CAGL0J03630g		1.23514	0.845365	2.35404	Ortholog(s) have role in mRNA splicing, via spliceosome and U2 snRNP, U2-type spliceosomal complex
CAGL0E01573g		1.22787	0.402168	2.34221	Unknown function
CAGL0L12672g		1.2264	0.5769	2.33982	Ortholog(s) have large ribosomal subunit rRNA binding activity and role in maturation of LSU-rRNA from tricistronic rRNA transcript
CAGL0F04499g		1.22057	0.814413	2.33039	Ortholog(s) have uridine transmembrane transporter activity, role in transmembrane transport, uridine transport and plasma membrane localization
CAGL0M11660g		1.20851	1.03417	2.31098	Has domain(s) with predicted hydrolase activity
CAGL0C02321g	PHM8	1.20839	0.576412	2.31079	Ortholog(s) have lysophosphatidic acid phosphatase activity
CAGL0M10285g		1.20704	0.31626	2.30863	Ortholog(s) have chromatin binding, methylated histone binding activity
CAGL0B02409g		1.20194	0.968839	2.3005	Unknown; Ortholog of Sc YML119W
CAGL0C00539g		1.20025	0.39185	2.2978	Ortholog(s) have role in positive regulation of (R)-carnitine transmembrane transport, positive regulation of polyamine transmembrane transpor; orthologue of Sc Agp2
CAGL0D02552g		1.19867	0.520983	2.29527	Unknown function
CAGL0J00253g		1.18976	0.541543	2.28116	Predicted adhesin
CAGL0I07249g		1.18331	1.44148	2.27097	Putative GTPase-activating protein involved in cell wall and cytoskeleton homeostasis; orthologous to Sc Bag7
CAGL0M11616g		1.17877	0.619238	2.26383	Ortholog(s) have ATPase activity and role in protein-RNA complex remodeling, rRNA processing, regulation of ribosomal subunit export from nucleus, ribosomal large subunit assembly
CAGL0K10010g		1.16919	0.70361	2.24885	Ortholog(s) have rRNA (adenine) methyltransferase activity, rRNA (adenine-N1-)-methyltransferase activity, role in rRNA methylation
CAGL0I08591g		1.16708	0.884291	2.24557	Unknown function; Ortholog of Sc YER158C
CAGL0H03685g		1.16033	0.277913	2.23508	Ortholog(s) have role in anisotropic cell growth
CAGL0L05016g		1.15956	1.46752	2.2339	Unknown function; orthologue of Sc STB6
CAGL0F00407g		1.15242	0.409085	2.22287	Ortholog(s) have deoxyhypusine monooxygenase activity
CAGL0A01760g		1.14977	1.38446	2.21878	Ortholog(s) have arginine-tRNA ligase activity and role in arginyl-tRNA aminoacylation
Cgla_YGOB_Anc_7.246		1.14744	1.18007	2.2152
CAGL0I09086g		1.14492	1.1728	2.21134	Unknown function; Has domain(s) with predicted transmembrane transporter activity
CAGL0G04763g		1.13855	1.3439	2.2016	Has domain(s) with predicted role in termination of G protein-coupled receptor signaling pathway
CAGL0H01419g		1.13757	0.31258	2.20011	Ortholog(s) have role in maturation of SSU-rRNA from tricistronic rRNA transcript
CAGL0E01903g		1.13029	1.06685	2.18903	Ortholog(s) have tRNA 2'-O-methyltransferase activity and role in tRNA methylation
CAGL0M07766g		1.12599		2.18251	Unknown function
CAGL0I05654g		1.1238	0.792791	2.1792	Ortholog(s) have uridine kinase activity and role in pyrimidine-containing compound salvage
CAGL0D01562g	FCY1	1.11866	-0.303161	2.17145	Ortholog(s) have cytosine deaminase activity and role in cytidine metabolic process
CAGL0F04521g		1.11075	0.311633	2.15957	Unknown function; Ortholog of Sc ECM13
CAGL0G05984g		1.10999	0.768634	2.15843	Ortholog(s) have role in ascospore wall assembly
CAGL0J00363g		1.0992	0.50918	2.14235	Putative protein of major facilitator superfamily; similar to Sc Yhk8
CAGL0D06600g		1.09076	1.6726	2.12986	Ortholog(s) have protein serine/threonine kinase activity,
CAGL0G01166g		1.08934	0.513465	2.12777	Unknown function
CAGL0F01485g	TIR2	1.08855		2.1266	Putative GPI-linked cell wall mannoprotein of the Srp1p/Tip1p family
CAGL0F04807g		1.08788	1.76293	2.12561	Unknown function
CAGL0G10021g		1.08771	1.27456	2.12537	Ortholog(s) have RNA polymerase II sequence-specific DNA-binding transcription factor recruiting activity and RNA polymerase III general transcription initiation factor activity
CAGL0H00440g		1.08336	0.661785	2.11896	Unknown function
CAGL0D02134g		1.07975	1.56187	2.11367	Unknown function	1
CAGL0M01804g		1.07164	1.17389	2.10182	Ortholog(s) have translation initiation factor activity and role in translation reinitiation, translational initiation
CAGL0C03223g	SDH2	1.06655	-1.06277	2.09442	Putative iron-sulfur protein subunit of succinate dehydrogenase
CAGL0M12144g		1.06591	0.197822	2.09348	Ortholog(s) have GTP binding, GTPase activity, ribosome binding, small ribosomal subunit rRNA binding
CAGL0G04741g		1.06201	0.612236	2.08783	Ortholog(s) have 2-isopropylmalate synthase activity, orthologous to Sc Leu4
CAGL0B01947g	INO2	1.05989	0.537761	2.08478	Transcriptional regulator involved in de novo inositol biosynthesis;
CAGL0E05390g	ALA1	1.05967	-0.112689	2.08445	Ortholog(s) have alanine-tRNA ligase activity, role in alanyl-tRNA aminoacylation and cytoplasm
CAGL0M06325g		1.05815	1.27533	2.08226	Ortholog(s) have DNA binding
CAGL0J08184g		1.04069	0.913665	2.05721	Ortholog(s) have basic amino acid transmembrane transporter activity; ortholog of Sc Alp1
CAGL0I10340g	PWP5	1.03203	1.64944	2.0449	Predicted adhesin
CAGL0J09614g		1.02676	0.401165	2.03744	Ortholog(s) have box H/ACA snoRNA binding activity, role in cleavage involved in rRNA processing, rRNA pseudouridine synthesis, snRNA pseudouridine synthesis and box H/ACA snoRNP complex
CAGL0J08294g		1.02077	1.2976	2.02901	Ortholog(s) have borate efflux transmembrane transporter activity, role in borate transport; orthologous to Sc Bor1
CAGL0L06754g		1.01558	0.116515	2.02171	Ortholog(s) have GTPase regulator activity, translation release factor activity
CAGL0K10780g		1.00592	0.276283	2.00823	Ortholog(s) have IMP dehydrogenase activity
CAGL0G09064g		1.00555	1.14782	2.0077	Ortholog(s) have role in glycerol biosynthetic process and cytosol
CAGL0H07249g	DYS1	1.00403	-0.360676	2.00559	Putative deoxyhypusine synthase
CAGL0J03520g		-1.00213	-1.32445	-2.00425	Has domain(s) with predicted peptidyl-prolyl cis-trans isomerase activity
CAGL0K01353g		-1.03174	-0.152758	-2.06348	Ortholog(s) have sterol binding activity, role in intracellular sterol transport, sterol transport and extracellular region, fungal-type vacuole lumen localization
CAGL0M00176g	BAT2	-1.00504	-1.56159	-2.01008	Ortholog(s) have L-isoleucine transaminase activity
CAGL0M02233g	RAD53	-1.00593	-1.74267	-2.01187	Protein involved in response to DNA damage
CAGL0G04081g		-1.00637	-0.542727	-2.01275	Unknown function
CAGL0D01474g		-1.00642	-0.0102225	-2.01284	Unknown function
CAGL0I09878g		-1.00656	-0.00695981	-2.01313	Ortholog(s) have long-chain fatty acid-CoA ligase activity, orthologue of Sc Faa1
CAGL0K06721g		-1.01291	-0.923652	-2.02582	Ortholog(s) have DNA binding, nucleosome binding activity
CAGL0K07678g		-1.01417	0.997254	-2.02833	Unknown function
Cgla_YGOB_YLR146W-A		-1.01436	-1.53597	-2.02873
CAGL0K01771g		-1.01487	0.075518	-2.02974	Has domain(s) with predicted acyltransferase activity
CAGL0G02739g		-1.01652	-0.393505	-2.03304	Ortholog(s) have DNA-binding transcription factor activity, orthologue of Sc Xbp1
CAGL0L07634g		-1.01763	-0.114776	-2.03527	Unknown function
CAGL0J03256g		-1.01879	-1.21742	-2.03758	Ortholog(s) have MAP kinase tyrosine phosphatase activity
CAGL0F01837g	SPT8	-1.01973	-0.846605	-2.03946	Ortholog(s) have TBP-class protein binding
CAGL0E02123g		-1.02322	-1.40268	-2.04645	Ortholog(s) have mitochondrial large ribosomal subunit localization
CAGL0A00165g		-1.02555	-0.283125	-2.0511	Unknown function
CAGL0E01419g	YPS2	-1.0267	-0.698019	-2.0534	Predicted aspartic protease
CAGL0B04697g		-1.02675	-1.80767	-2.05351	Unknown function
CAGL0E00275g	EPA20	-1.02908	-0.381928	-2.05816	Predicted adhesin
CAGL0F08723g		-1.03132	-1.19571	-2.06265	Ortholog(s) have ethanolamine-phosphate cytidylyltransferase activity and role in phosphatidylethanolamine biosynthetic process
CAGL0H06523g		-1.0382	-0.749134	-2.07639	Ortholog(s) have pantoate-beta-alanine ligase activity and role in pantothenate biosynthetic process
CAGL0H07513g	IFA38	-1.03929	-1.60726	-2.07859	Predicted ketoreductase involved in production of very long chain fatty acid for sphingolipid biosynthesis
CAGL0G08954g		-1.04075	-0.759497	-2.08149	Unknown function
CAGL0K10824g		-1.041	0.211247	-2.08199	Unknown function; ortholog of Sc YLR149C
CAGL0H05181g		-1.042	-0.602678	-2.08401	Putative component of ESCRT-I complex involved in protein trafficking
CAGL0C04411g		-1.0438	0.448634	-2.08759	Ortholog(s) have role in DNA repair and replication fork protection complex localization
CAGL0F00275g		-1.04894	-1.51621	-2.09787	Ortholog(s) have GTP binding, phosphatidylinositol-4-phosphate binding
CAGL0K11440g		-1.05152	0.366402	-2.10304	Ortholog(s) have role in DNA repair, mitotic chromosome condensation,
CAGL0G05610g		-1.05157	-0.900006	-2.10315	Ortholog(s) have D-leucyl-tRNA(Leu) deacylase activity
CAGL0L09691g	ZCF37	-1.05775	0.733804	-2.11551	Ortholog(s) have DNA-binding transcription activator activity
CAGL0I00242g		-1.05821	-0.81905	-2.11643	Has domain(s) with predicted glutathione peroxidase activity and role in response to oxidative stress
CAGL0K11462g		-1.06231	-1.1631	-2.12461	Ortholog(s) have DNA binding activity, role in chromatin assembly or disassembly
CAGL0H05313g		-1.06558	-0.649942	-2.13116	Unknown function; Ortholog of Sc YPL071C
CAGL0C05577g		-1.06585	-0.678773	-2.1317	Ortholog(s) have role in ascospore wall assembly,
CAGL0A01848g		-1.06693	-1.47535	-2.13387	Ortholog(s) have role in COPII-coated vesicle cargo loading and COPII vesicle coat localization
CAGL0M05313g		-1.06983	-0.219137	-2.13966	Unknown function; Ortholog of Sc YBR197C
CAGL0M03839g		-1.07467	-0.984773	-2.14935	Ortholog(s) have role in apoptotic process, calcium-mediated signaling,
CAGL0K12980g	BMT7	-1.07546	-1.27687	-2.15092	Beta mannosyltransferase
CAGL0K08756g	AP5	-1.08035	0.67654	-2.16069	bZIP domain-containing protein; with Hap4p involved in regulation of iron tolerance; similar to Yap5
CAGL0D01034g	VIG9	-1.08517	-0.175374	-2.17034	GDP-mannose pyrophosphorylase involved in the synthesis of GDP-mannose for protein glycosylation
CAGL0F02519g	ZCF9	-1.08713	-0.803085	-2.17425	Has domain(s) with predicted DNA binding, DNA-binding transcription factor activity,
CAGL0A04367g		-1.09289	-1.47766	-2.18579	Unknown function; Ortholog of Sc YBL059W
CAGL0I07315g		-1.09582	-0.539106	-2.19164	Ortholog(s) have pyridoxal phosphatase activity
CAGL0H02959g	TOS8	-1.10103	-0.362726	-2.20206	Ortholog(s) have chromatin binding activity
CAGL0H02695g		-1.10215	-1.22015	-2.2043	Ortholog(s) have glycogenin glucosyltransferase activity and role in glycogen biosynthetic process
CAGL0B04873g		-1.10522	-1.23847	-2.21043	Ortholog(s) have role in maintenance of DNA trinucleotide repeats, mitotic sister chromatid cohesion and Ctf18 RFC-like complex localization
CAGL0J10978g		-1.10694	-1.46805	-2.21387	Ortholog(s) have phosphatidylinositol-4,5-bisphosphate binding activity
CAGL0H00847g		-1.125	-1.67399	-2.25001	Ortholog(s) have UDP-galactose transmembrane transporter activity and role in UDP-galactose transmembrane transport, UDP-glucose transmembrane transport
CAGL0H05379g		-1.13858	-0.416904	-2.27717	Ortholog(s) have DNA-binding transcription activator activity; orthologue of Sc GCR1
CAGL0F04741g	CMK2	-1.14099	-0.900067	-2.28198	Ortholog(s) have calmodulin binding, calmodulin-dependent protein kinase activity, protein kinase activity
CAGL0F00759g		-1.14389	-1.38876	-2.28779	Ortholog(s) have role in protein O-linked mannosylation and dolichyl-phosphate-mannose-protein mannosyltransferase Pmt1p-Pmt3p dimer complex, dolichyl-phosphate-mannose-protein mannosyltransferase Pmt5p-Pmt3p dimer complex localization
CAGL0K09262g		-1.14616	-1.16371	-2.29231	Ortholog(s) have actin monomer binding, polysome binding, protein kinase inhibitor activity, ribosome binding activity and role in negative regulation of protein phosphorylation
CAGL0M08250g		-1.15064	-0.127868	-2.30129	Ortholog(s) have zinc ion transmembrane transporter activity, role in cellular zinc ion homeostasis, zinc ion transport and fungal-type vacuole membrane localization; ortholog of Sc Zrt3
CAGL0M07634g		-1.15533	-0.118453	-2.31067	Ortholog(s) have role in pseudohyphal growth and cytosol
CAGL0L04818g		-1.15883	-0.620892	-2.31766	Unknown function; Ortholog of Sc YGR117C
CAGL0C01507g		-1.16171	-0.594215	-2.32342	Ortholog(s) have phosphoprotein phosphatase activity and role in negative regulation of pheromone-dependent signal transduction
CAGL0M08844g		-1.16251	-0.89844	-2.32503	Ortholog(s) have protein-lysine N-methyltransferase activity, role in negative regulation of cytoplasmic translational initiation in response to stress
CAGL0C05027g		-1.16765	-0.480389	-2.33531	Ortholog(s) have role in acetate catabolic process; ortholog of Sc Yat1
CAGL0H05819g		-1.18139	-1.26621	-2.36279	Ortholog(s) have role in mitochondrial proton-transporting ATP synthase complex assembly
CAGL0C05005g		-1.19135	-1.5388	-2.3827	Ortholog(s) have protein serine/threonine kinase activity and role in meiotic spindle disassembly,
CAGL0K00627g		-1.192	-1.27722	-2.384	Unknown function; Ortholog of Sc YJL193W
CAGL0J00407g		-1.19374	0.0337273	-2.38748	Ortholog(s) have inorganic cation transmembrane transporter activity
CAGL0H00825g		-1.19443	-0.0553093	-2.38887	Has domain(s) with predicted nucleoside-triphosphatase activity
CAGL0L10912g	TPO4	-1.19751	-0.43634	-2.39502	Polyamine exporter
CAGL0D00660g		-1.20207	-1.40851	-2.40414	Ortholog(s) have MAP-kinase scaffold activity and role in negative regulation of MAP kinase activity, osmosensory signaling pathway via Sho1 osmosensor
CAGL0D04686g		-1.20997	-0.0594911	-2.41995	Ortholog(s) have metalloendopeptidase activity and role in axial cellular bud site selection
CAGL0J10560g		-1.21796	-0.594003	-2.43593	Ortholog(s) have role in homologous chromosome segregation
CAGL0H03927g		-1.22103	0.549585	-2.44206	Ortholog(s) have ubiquitin binding activity and role in ATP export, late endosome to vacuole transport,
CAGL0M06655g	HH3	-1.22299	1.29804	-2.44599	Histone H3
CAGL0K03663g		-1.23238	-0.266483	-2.46476	Unknown function
CAGL0G06996g		-1.23503	0.388155	-2.47006	Unknown function
CAGL0K06963g	ROT2	-1.23818	-0.635913	-2.47636	Ortholog(s) have glucan 1,3-alpha-glucosidase activity
CAGL0L05302g		-1.24651	0.0455084	-2.49301	Ortholog(s) have phosphopantothenoylcysteine decarboxylase activity, role in coenzyme A biosynthetic process
CAGL0F07491g		-1.25428	-1.61496	-2.50856	Ortholog(s) have myosin II heavy chain binding
CAGL0M10505g		-1.25812	-0.730429	-2.51624	Ortholog(s) have DNA end binding
CAGL0K00539g		-1.26316	-0.348009	-2.52631	Has domain(s) with predicted role in intracellular protein transport
CAGL0H07689g		-1.27037	-0.670817	-2.54074	Ortholog(s) have role in lipid homeostasis
CAGL0G06754g		-1.27671	-1.5851	-2.55342	Ortholog(s) have 1-phosphatidylinositol binding, GTPase activity,
CAGL0J03146g		-1.27875	-0.459468	-2.55749	Ortholog(s) have CDP reductase activity
CAGL0M13937g		-1.29188	-0.267802	-2.58376	Ortholog(s) have enzyme activator activity; similar to Sc Glc8
CAGL0G07183g.2		-1.30651	-0.125463	-2.61302	Has domain(s) with predicted RNA binding
CAGL0J11132g		-1.30771	-1.10937	-2.61542	Ortholog(s) have role in pheromone-dependent signal transduction involved in conjugation with cellular fusion and membrane raft, plasma membrane localization
CAGL0K10692g		-1.32011	-1.09253	-2.64021	Ortholog(s) have phosphatidylinositol-3,5-bisphosphate binding, phosphatidylinositol-3-phosphate binding, phosphatidylinositol-4-phosphate binding, ubiquitin binding activity
CAGL0K00231g		-1.3322	-0.0656001	-2.6644	Ortholog(s) have 5-oxoprolinase
CAGL0H07601g		-1.33358	0.10954	-2.66717	Ortholog(s) have DNA helicase activity
CAGL0K05269g		-1.34017	-1.38482	-2.68035	Ortholog(s) have methylated histone binding activity, role in histone acetylation and NuA3 histone acetyltransferase complex
CAGL0D00352g	PXA2	-1.34567	-0.309849	-2.69135	Ortholog(s) have ATPase-coupled transmembrane transporter activity, role in fatty acid transmembrane transport and integral component of peroxisomal membrane
CAGL0L05588g		-1.34593	-0.540281	-2.69186	Ortholog(s) have deaminated glutathione amidase activity and role in cellular amide catabolic process
CAGL0A02343g		-1.35713	0.520108	-2.71427	Unknown function
CAGL0K03047g		-1.35871	-1.41479	-2.71743	Ortholog(s) have DNA binding, DNA binding, bending activity, role in mitochondrial DNA packaging, mitochondrial genome maintenance,
CAGL0B04785g		-1.37103	-0.00226859	-2.74205	Unknown function
CAGL0B03839g	MET3	-1.38487	0.00440054	-2.76975	Ortholog(s) have sulfate adenylyltransferase (ATP) activity
CAGL0H01793g		-1.40394	-0.740302	-2.80788	Ortholog(s) have role in N-glycan processing
CAGL0M05995g		-1.41163	0.673875	-2.82327	Ortholog(s) have lipid droplet localization
CAGL0L11990g		-1.41215	0.896621	-2.82429	Ortholog(s) have disulfide oxidoreductase activity
CAGL0M06347g		-1.41497	-0.370273	-2.82994	Ortholog(s) have phytoceramidase activity, sphingosine N-acyltransferase activity, role in ceramide biosynthetic process; ortholog of Sc Ypc1
CAGL0C02057g		-1.42349	-0.344587	-2.84697	Unknown function
CAGL0F02585g		-1.42612	-0.547517	-2.85223	Ortholog(s) have nicotinamide riboside hydrolase activity
CAGL0H09944g		-1.43449	-0.336442	-2.86898	Ortholog(s) have 2-alkenal reductase [NAD(P)+] activity, NADPH:quinone reductase activity
CAGL0J02662g	IRC5	-1.44	0.820244	-2.88	Ortholog(s) have role in mitotic recombination
CAGL0L10714g	ERG2	-1.44	0.622254	-2.88	C-8 sterol isomerase
CAGL0M00220g		-1.44	0.141421	-2.88	Ortholog(s) have dolichyl-phosphate-mannose-protein mannosyltransferase activity
CAGL0F05885g		-1.445	0.487904	-2.89	Ortholog(s) have cytoskeletal protein binding
CAGL0H07447g		-1.44904	-0.622712	-2.89807	Ortholog(s) have protein kinase activator activity and role in chromosome segregation, protein phosphorylation, regulation of cytokinesis
CAGL0G06336g		-1.45	0.890954	-2.9	Ortholog(s) have actin filament binding, microfilament motor activity, role in endoplasmic reticulum inheritance, intracellular mRNA localization, mating type switching and cellular bud, cellular bud tip, filamentous actin localization
CAGL0J11638g		-1.45	0.579828	-2.9	Ortholog(s) have centromeric DNA binding, phosphoprotein binding, protein kinase activity, protein serine/threonine kinase activity,
CAGL0E06446g		-1.455	0.304056	-2.91	Ortholog(s) have RNA lariat debranching enzyme activity and role in RNA catabolic process
CAGL0G06226g		-1.455	1.20915	-2.91	Ortholog(s) have role in asymmetric protein localization to new mitotic spindle pole body, positive regulation of exit from mitosis, vesicle-mediated transport and cellular bud localization
CAGL0M02519g		-1.455	0.0494975	-2.91	Unknown function;
CAGL0I04818g		-1.46	0.509117	-2.92	Ortholog(s) have chitin synthase activity; similar to Sc CHS1
CAGL0M10021g		-1.46	0.0282842	-2.92	Unknown function;
CAGL0G07249g		-1.46382	-0.771048	-2.92764	Ortholog(s) have RNA polymerase II transcription regulatory region sequence-specific DNA binding activity; similar to Sc YOX1
CAGL0E05192g		-1.465	0.233345	-2.93	Has domain(s) with predicted D-threo-aldose 1-dehydrogenase activity
CAGL0H02805g		-1.465	0.643467	-2.93	Ortholog(s) have ATPase, DNA binding
CAGL0E02315g		-1.465	0.671751	-2.93	Ortholog(s) have chromatin binding activity
CAGL0I07953g		-1.465	0.516188	-2.93	Ortholog(s) have phosphatidylinositol-4,5-bisphosphate binding activity
CAGL0L10472g		-1.47	0.311127	-2.94	Ortholog(s) have cargo adaptor activity, phosphatidylinositol-3-phosphate binding activity
CAGL0L04466g		-1.475	0.615183	-2.95	Ortholog(s) have GTPase activity
CAGL0L08514g		-1.475	0.148492	-2.95	Ortholog(s) have hydrolase activity, acting on ester bonds, triglyceride lipase activity
CAGL0E01969g		-1.47734	-0.690881	-2.95468	Ortholog(s) have inorganic cation transmembrane transporter activity; orthologue of Sc SMF1
CAGL0G06798g		-1.47996	-0.269601	-2.95992	Ortholog(s) have role in iron ion homeostasis and cytoplasm
CAGL0K03553g	FOL3	-1.48	0.777817	-2.96	Ortholog(s) have dihydrofolate synthase activity
CAGL0H01199g		-1.48659	-0.605747	-2.97318	Ortholog(s) have eukaryotic translation initiation factor 2alpha kinase activity
CAGL0I00836g		-1.48855	-0.667367	-2.97711	Ortholog(s) have role in cellular response to glucose starvation
CAGL0C00341g		-1.49	0.381838	-2.98	Ortholog(s) have double-stranded DNA binding
CAGL0K09394g		-1.49	0.650538	-2.98	Ortholog(s) have GTPase activity
CAGL0G07271g	TSA1	-1.495	0.0494974	-2.99	Putative thioredoxin peroxidase
CAGL0G00286g	GAS1	-1.5	1.00409	-3	Glycoside hydrolase of the Gas/Phr family, involved in cell wall maintenance; confers resistance to azole drugs
CAGL0L10538g		-1.5	0.749533	-3	Has domain(s) with predicted 2-dehydropantoate 2-reductase activity
CAGL0C01727g		-1.505	0.162635	-3.01	Ortholog(s) have UDP-N-acetylglucosamine-dolichyl-phosphate N-acetylglucosaminephosphotransferase activity and role in N-glycan processing
CAGL0C05599g		-1.505	0.629325	-3.01	Ortholog(s) have role in actin cortical patch localization, actin cytoskeleton organization
CAGL0I06380g		-1.505	0.219203	-3.01	Putative mitochondrial RNase P precursor
CAGL0F00957g		-1.51	0.240416	-3.02	Putative serine/threonine protein phosphatase 2A, regulatory chain A
CAGL0H09130g		-1.51	0.59397	-3.02	Ortholog(s) have enzyme activator activity and role in protein N-linked glycosylation, protein O-linked glycosylation
CAGL0J05478g		-1.51	0.226274	-3.02	Ortholog(s) have structural constituent of ribosome activity and mitochondrial small ribosomal subunit localization
CAGL0F05907g		-1.515	0.657609	-3.03	Ortholog(s) have DNA translocase activity
CAGL0J09790g		-1.52	0.410122	-3.04	Ortholog(s) have guanine nucleotide transmembrane transporter activity and role in cellular iron ion homeostasis
CAGL0L08068g		-1.52	1.1738	-3.04	Ortholog(s) have single-stranded DNA binding activity, role in mitochondrial genome maintenance
CAGL0M13805g	SCW4	-1.52	1.10309	-3.04	Unknown function;
CAGL0K03839g		-1.52081	-0.819124	-3.04162	Unknown function; Ortholog of S. cerevisiae : YMR130W
CAGL0L06930g		-1.52366	-0.94084	-3.04733	Unknown function; Ortholog of Sc YDL085C-A
CAGL0C01749g		-1.525	0.219203	-3.05	Ortholog(s) have 5'-deoxynucleotidase activity, GMP 5'-nucleotidase activity and role in deoxyribonucleoside monophosphate catabolic process
CAGL0G06666g		-1.525	1.0253	-3.05	Ortholog(s) have DNA replication origin binding
CAGL0J08415g	SAM2	-1.525	0.968736	-3.05	S-adenosylmethionine synthetase
CAGL0K00341g		-1.525	0.162635	-3.05	Unknown function;
CAGL0A02574g		-1.53	0.523259	-3.06	Involved in tryptophan biosynthetic process; similar to Sc Trp4
CAGL0F06391g		-1.53	0.438406	-3.06	Ortholog(s) have GTPase activator activity
CAGL0K12298g		-1.53	0.169706	-3.06	Ortholog(s) have role in ascospore formation, establishment of meiotic sister chromatid cohesion, establishment of mitotic sister chromatid cohesion and maintenance of meiotic sister chromatid cohesion
CAGL0I04796g		-1.535	0.205061	-3.07	Ortholog(s) have copper ion binding activity, role in cell redox homeostasis, cellular response to oxidative stress and mitochondrial membrane localization
CAGL0E02145g		-1.535	0.13435	-3.07	Ortholog(s) have role in negative regulation of gene expression, negative regulation of transcription by RNA polymerase II
CAGL0G06424g		-1.535	0.473762	-3.07	Ortholog(s) have phosphatidylinositol-3-phosphate binding activity, role in late endosome to Golgi transport, protein localization and cytosol, endosome localization
CAGL0E01727g	YPS3	-1.53753	-0.734056	-3.07506	Aspartic protease
CAGL0L01067g		-1.54	0.296985	-3.08	Unknown function;
CAGL0K05709g		-1.545	0.954594	-3.09	Ortholog(s) have role in budding cell bud growth, mitotic morphogenesis checkpoint signaling, protein autophosphorylation, regulation of protein localization to cell division site, septin ring assembly and cellular bud neck localization
CAGL0G08558g		-1.55	0.707107	-3.1	Ortholog(s) have GTP binding, GTPase activity
CAGL0M02871g		-1.55	0.494975	-3.1	Ortholog(s) have alpha-1,2-mannosyltransferase activity, role in protein glycosylation and Golgi apparatus localization
CAGL0M03311g		-1.55	0.636396	-3.1	Ortholog of Sc GTT3
CAGL0K00517g		-1.5594	-1.13213	-3.1188	Ortholog(s) have protein serine/threonine kinase activity; orthologue of Sc TOR2
CAGL0H09834g	HHF3	-1.56	0.537401	-3.12	Histone H4; one of three genes encoding histone H4 (HHF1, HHF2, HHF3); changes in gene dosage via homologous recombination modulates DNA damage response
CAGL0L06094g	STR3	-1.56	0.66468	-3.12	Putative cystathionine beta-lyase
CAGL0J01177g	ABF1	-1.565	0.13435	-3.13	Essential protein involved in subtelomeric silencing and cell cycle progression
CAGL0J07568g		-1.565	0.700036	-3.13	Ortholog(s) have RNA polymerase II cis-regulatory region sequence-specific DNA binding, cysteine-type peptidase activity, double-stranded DNA binding, mRNA binding, single-stranded DNA binding activity
CAGL0M04323g	ACE2	-1.565	0.558614	-3.13	Putative transcription factor; null mutation results in hypervirulence in immunocompromised mice
CAGL0G08668g		-1.57	1.18794	-3.14	Ortholog(s) have role in fungal-type cell wall organization and fungal-type cell wall localization
CAGL0C04389g		-1.58	0.579828	-3.16	Ortholog(s) have nucleus, replication fork protection complex, site of double-strand break localization
CAGL0K01001g		-1.58	0.59397	-3.16	Ortholog(s) have role in protein localization to plasma membrane, protein targeting to vacuole, receptor-mediated endocytosis
CAGL0H05005g		-1.58	0.523259	-3.16	Ortholog(s) have phosphatidylinositol transfer activity
CAGL0D02596g		-1.585	0.162635	-3.17	Ortholog(s) have role in DNA-dependent DNA replication, double-strand break repair via break-induced replication, mitotic DNA replication initiation
CAGL0K00825g	SER2	-1.585	0.360624	-3.17	Has domain(s) with predicted phosphatase activity, phosphoserine phosphatase activity and role in L-serine biosynthetic process
CAGL0J04950g		-1.6	0.622254	-3.2	Ortholog(s) have role in mitotic recombination and cellular bud localization
CAGL0F03839g		-1.60384	-0.713102	-3.20767	Ortholog of Sc YMR209C
CAGL0M03993g		-1.605	0.657609	-3.21	Ortholog(s) have double-stranded DNA binding, sequence-specific DNA binding, single-stranded DNA binding activity
CAGL0L09042g		-1.61	0.424264	-3.22	Ortholog(s) have H4 histone acetyltransferase activity, chromatin binding, histone acetyltransferase activity and histone acetyltransferase activity (H4-K12 specific)
CAGL0E02255g		-1.61	0.183848	-3.22	Ortholog(s) have role in fungal-type cell wall organization and extrinsic component of plasma membrane localization
CAGL0J08822g		-1.61	0.353553	-3.22	Ortholog(s) have cyclin-dependent protein serine/threonine kinase regulator activity
CAGL0M06677g	HHF2	-1.61	0.39598	-3.22	Histone H4; one of three genes encoding histone H4 (HHF1, HHF2, HHF3); changes in gene dosage via homologous recombination modulates DNA damage response
CAGL0J02244g		-1.615	0.657609	-3.23	Ortholog(s) have role in hyphal growth
CAGL0M07612g		-1.615	0.0777818	-3.23	Ortholog(s) have polyamine oxidase activity and role in pantothenate biosynthetic process, spermine catabolic process
CAGL0J06864g		-1.61642	-0.284044	-3.23284	Ortholog(s) have role in meiotic DNA recombinase assembly, reciprocal meiotic recombination and condensed nuclear chromosome localization
CAGL0B02101g		-1.62382	-1.05345	-3.24764	Ortholog(s) have phosphatidylinositol-3,5-bisphosphate binding, phosphatidylinositol-3-phosphate binding, phosphatidylinositol-4-phosphate binding, phosphatidylinositol-5-phosphate binding activity
CAGL0L08294g		-1.63	0.579828	-3.26	Ortholog(s) have role in axial cellular bud site selection and cell division site, cellular bud neck, cellular bud neck septin ring, incipient cellular bud site, integral component of plasma membrane localization
CAGL0K05797g	EMI1	-1.63	0.438406	-3.26	Unknown function;
CAGL0I04378g		-1.635	0.940452	-3.27	Ortholog(s) have mannosyltransferase activity, role in cell wall mannoprotein biosynthetic process, protein N-linked glycosylation and Golgi apparatus localization
CAGL0J10626g		-1.635	0.346482	-3.27	Has domain(s) with predicted membrane localization
CAGL0L01749g		-1.64	0.933381	-3.28	Ortholog(s) have DNA primase activity, single-stranded DNA binding activity and role in DNA replication, DNA replication, synthesis of RNA primer, double-strand break repair
CAGL0D04246g		-1.64	0.565685	-3.28	Ortholog(s) have role in late endosome to vacuole transport, protein transport to vacuole involved in ubiquitin-dependent protein catabolic process via the multivesicular body sorting pathway
CAGL0K05467g		-1.645	1.22329	-3.29	Putative thymidylate synthase
CAGL0J08756g		-1.65009	-0.53789	-3.30019	Ortholog(s) have ubiquitin-protein transferase activity and role in negative regulation of protein autoubiquitination, retrograde protein transport, ER to cytosol, ubiquitin-dependent ERAD pathway
CAGL0L08888g		-1.65291	-0.412574	-3.30583	Ortholog(s) have sterol binding activity, role in sphingolipid metabolic process, sterol transport and extracellular region, fungal-type vacuole membrane localization
CAGL0L02607g		-1.65677	0.0311612	-3.31353	Has domain(s) with predicted hydrolase activity and role in nucleotide catabolic process
CAGL0I02794g		-1.66	0.0282842	-3.32	Ortholog of Sc YOR114W
CAGL0J08888g		-1.66	0.339411	-3.32	Ortholog(s) have role in microtubule nucleation, mitotic cytokinesis, site selection, mitotic spindle midzone assembly, mitotic spindle organization
CAGL0E04818g		-1.67	0.707107	-3.34	Ortholog(s) have role in mitochondrion organization and extrinsic component of mitochondrial outer membrane localization
CAGL0G00726g	RFA1	-1.675	0.799031	-3.35	DNA replication factor A
CAGL0K12848g		-1.68	1.32936	-3.36	Putative phosphomannomutase; protein differentially expressed in azole resistant strain
CAGL0I01232g		-1.68	0.721249	-3.36	Has domain(s) with predicted role in transport and integral component of membrane localization
CAGL0I05852g		-1.685	0.671751	-3.37	Ortholog(s) have cyclin-dependent protein serine/threonine kinase regulator activity
CAGL0M02783g		-1.685	1.08187	-3.37	Has domain(s) with predicted DNA binding activity
CAGL0C00968g		-1.68923	-0.492489	-3.37846	Predicted adhesin
CAGL0E04180g		-1.69	0.721249	-3.38	Has domain(s) with predicted role in dolichol-linked oligosaccharide biosynthetic process
CAGL0E04576g		-1.69	0.777818	-3.38	Putative regulatory subunit of kinase complex involved in initiation of DNA replication
CAGL0K08800g	ADI1	-1.69	0.678822	-3.38	Ortholog(s) have acireductone dioxygenase (Ni2+-requiring) activity and role in L-methionine salvage from methylthioadenosine
CAGL0J04466g		-1.695	0.0777818	-3.39	Ortholog(s) have role in fungal-type cell wall organization and cell cortex of cell tip, membrane raft, plasma membrane localization
CAGL0L09471g		-1.7	0.523259	-3.4	Ortholog(s) have DNA primase activity, single-stranded DNA binding activity and role in DNA replication, DNA replication, synthesis of RNA primer
CAGL0E02409g		-1.705	0.26163	-3.41	Unknown function;
CAGL0G07997g		-1.70859	-0.548989	-3.41719	Ortholog(s) have zinc ion transmembrane transporter activity; orthologue of Sc Zrg17
CAGL0A03905g	HMX1	-1.71274	0.227564	-3.42547	Ortholog(s) have heme oxygenase (decyclizing) activity, role in cellular iron ion homeostasis, heme catabolic process,
CAGL0H09438g		-1.72	0.155563	-3.44	Ortholog(s) have ATPase activator activity
CAGL0K12650g	TUB2	-1.72	0.933381	-3.44	Beta-tubulin
CAGL0B00990g		-1.72126	-0.328448	-3.44253	Ortholog(s) have oxidoreductase activity, acting on NAD(P)H, nitrogenous group as acceptor activity and role in cellular response to oxidative stress, negative regulation of fatty acid metabolic process
CAGL0G01386g		-1.73	0.749533	-3.46	Ortholog(s) have role in TOR signaling, actin cytoskeleton organization, actin filament bundle assembly, eisosome assembly, endosomal transport and establishment or maintenance of actin cytoskeleton polarity
CAGL0K07942g		-1.735	0.459619	-3.47	Unknown function
CAGL0J07018g		-1.73977	-0.319647	-3.47953	Ortholog of Sc YPL109C
CAGL0C00495g		-1.745	0.700036	-3.49	Ortholog(s) have cyclin-dependent protein serine/threonine kinase activator activity, histone binding, protein kinase activator activity, protein-containing complex binding, ubiquitin binding, zinc ion binding activity
CAGL0A03828g		-1.75	0.66468	-3.5	Has domain(s) with predicted role in termination of G protein-coupled receptor signaling pathway
CAGL0E04774g		-1.75	0.127279	-3.5	Unknown function;
CAGL0D04642g		-1.76	0.0141421	-3.52	Ortholog(s) have cyclin-dependent protein serine/threonine kinase regulator activity
CAGL0A00209g		-1.76467	-0.887486	-3.52933	Ortholog(s) have dolichyl-diphosphooligosaccharide-protein glycotransferase activity, role in protein N-linked glycosylation and oligosaccharyltransferase complex localization
CAGL0K01441g		-1.77	0.0565685	-3.54	Ortholog(s) have RNA binding activity, role in spliceosomal complex assembly and U2-type prespliceosome localization
CAGL0D01716g		-1.775	1.09602	-3.55	Ortholog(s) have DNA polymerase processivity factor activity
CAGL0H06171g		-1.785	0.0212132	-3.57	Ortholog(s) have role in tRNA wobble uridine modification and cytoplasm localization
CAGL0F02079g		-1.8	0.113137	-3.6	Ortholog(s) have DNA secondary structure binding, cohesin loading activity, double-stranded DNA binding, minor groove of adenine-thymine-rich DNA binding, topological DNA co-entrapment activity
CAGL0F00671g		-1.805	0.813173	-3.61	Ortholog(s) have actin filament binding
CAGL0J05610g	TOP2	-1.805	0.657609	-3.61	DNA topoisomerase II
CAGL0G09449g		-1.815	0.558614	-3.63	Putative glycoside hydrolase; predicted GPI-anchor
CAGL0K00319g		-1.815	0.247487	-3.63	Ortholog(s) have ATP binding, magnesium ion binding, ubiquitin activating enzyme activity, role in protein ubiquitination and cytoplasm, nucleus localization
CAGL0K00913g		-1.815	0.176777	-3.63	Ortholog(s) have formate-tetrahydrofolate ligase activity, methenyltetrahydrofolate cyclohydrolase activity, methylenetetrahydrofolate dehydrogenase (NADP+) activity
CAGL0H00759g		-1.82691	-0.7485	-3.65382	Has domain(s) with predicted 3'-5' DNA helicase activity, ATP binding, helicase activity, nucleic acid binding activity and role in DNA recombination, DNA repair, DNA replication
CAGL0B03091g		-1.83	0.155563	-3.66	Ortholog(s) have role in cellular bud site selection, pseudohyphal growth and cellular bud tip
CAGL0J07876g		-1.835	1.06773	-3.67	Unknown function; Ortholog of Sc RTC4
CAGL0L06006g	ATG1	-1.8358	-0.344067	-3.67161	Putative protein serine/threonine kinase, required for induction of autophagy under nitrogen starvation and oxidative stress
CAGL0D03652g		-1.845	0.120208	-3.69	Unknown function;
CAGL0E04224g		-1.845	0.162635	-3.69	Unknown function;
CAGL0G01848g		-1.84905	-0.774452	-3.69811	Ortholog(s) have role in mRNA splicing, via spliceosome and Prp19 complex, U2-type catalytic step 1 spliceosome localization
CAGL0D04466g		-1.85	0.636396	-3.7	Ortholog(s) have role in DNA strand elongation involved in mitotic DNA replication, DNA-dependent DNA replication, double-strand break repair via break-induced replication, mitotic DNA replication initiation
CAGL0B01287g		-1.86	0.367695	-3.72	Has domain(s) with predicted guanyl-nucleotide exchange factor activity, role in regulation of small GTPase mediated signal transduction, small GTPase mediated signal transduction and intracellular anatomical structure localization
CAGL0K00297g		-1.875	0.403051	-3.75	Ortholog(s) have phosphatidylinositol-3,5-bisphosphate 5-phosphatase activity, phosphatidylinositol-3-phosphatase activity, phosphatidylinositol-4-phosphate phosphatase activity and role in phosphatidylinositol dephosphorylation
CAGL0G00594g	ERG26	-1.88	0.0424264	-3.76	Has domain(s) with predicted 3-beta-hydroxy-delta5-steroid dehydrogenase activity and role in steroid biosynthetic process
CAGL0B01188g		-1.9	0.890955	-3.8	Ortholog(s) have chromatin binding activity, role in cellular response to DNA damage stimulus
CAGL0D02684g		-1.9	0.636396	-3.8	Ortholog(s) have microtubule binding, molecular adaptor activity and role in attachment of mitotic spindle microtubules to kinetochore, monopolar spindle attachment to meiosis I kinetochore
CAGL0I05060g		-1.9	0.721249	-3.8	Ortholog(s) have sequence-specific DNA binding activity and role in chromatin silencing at telomere
CAGL0L03267g	GAP1	-1.9	0.0565686	-3.8	Ortholog(s) have L-proline transmembrane transporter activity
CAGL0H01221g		-1.90484	-0.798739	-3.80969	Ortholog(s) have RNA polymerase II complex binding activity, role in DNA damage response
CAGL0A03102g	ARO10	-1.905	1.19501	-3.81	Ortholog(s) have carboxy-lyase activity, phenylpyruvate decarboxylase activity
CAGL0K01419g		-1.92	0.19799	-3.84	Ortholog(s) have RNA binding activity
CAGL0K04169g		-1.925	0.289914	-3.85	Ortholog(s) have MAP kinase activity, transcription factor binding activity
CAGL0L01793g		-1.935	0.487904	-3.87	Ortholog(s) have structural constituent of cytoskeleton activity,
CAGL0F05841g		-1.94	1.03238	-3.88	Ortholog(s) have role in adaptation of signaling pathway by response to pheromone involved in conjugation with cellular fusion, protein deneddylation and COP9 signalosome localization
CAGL0C00253g		-1.94	1.08894	-3.88	Predicted adhesin
CAGL0C00231g		-1.945	0.445477	-3.89	Has domain(s) with predicted nucleobase transmembrane transporter activity, role in nucleobase transport, transmembrane transport and membrane localization; ortholog of Sc Fcy21
CAGL0H10626g	AWP13	-1.95	0.820244	-3.9	Predicted adhesin
CAGL0C04004g		-1.953	-0.801919	-3.906	Has domain(s) with predicted glycosyltransferase activity
CAGL0B02838g	MUP1	-1.955	0.586899	-3.91	Unknown function;
CAGL0L00539g		-1.955	0.0777817	-3.91	Ortholog(s) have role in ubiquitin-dependent ERAD pathway
CAGL0L04862g		-1.955	0.0777817	-3.91	Ortholog(s) have structural constituent of nuclear pore activity and role in NLS-bearing protein import into nucleus
CAGL0I05302g		-1.96	0.551543	-3.92	Ortholog(s) have chromatin binding activity, role in mitotic sister chromatid cohesion and cytoplasm, cytosol, nuclear mitotic cohesin complex, nucleus localization
CAGL0K00715g	RTA1	-1.96	0.537401	-3.92	Putative protein involved in 7-aminocholesterol resistance
Cgla_YGOB_YER053C-A		-1.96131	-0.48502	-3.92262
CAGL0J05060g	ZAP1	-1.96204	0.0611646	-3.92408	Ortholog(s) have DNA-binding transcription factor activity
CAGL0L04136g		-1.995	0.106066	-3.99	Ortholog(s) have gamma-tubulin binding activity
CAGL0I00484g		-2	0.98995	-4	Ortholog(s) have glucan endo-1,6-beta-glucosidase activity and role in cellular glucan metabolic process
CAGL0M09086g		-2.03	0.565685	-4.06	Ortholog(s) have GTP binding activity, role in axial cellular bud site selection, protein localization to bud neck, septin ring organization and cellular bud neck, cellular bud neck contractile ring, cellular bud scar localization
CAGL0F08371g	TNA1	-2.04	0.183848	-4.08	High-affinity nicotinic acid transporter
CAGL0I01210g		-2.05	0.240416	-4.1	Ortholog(s) have [cytochrome c]-lysine N-methyltransferase activity, role in peptidyl-lysine methylation and cytosol localization
CAGL0F04763g		-2.05	0.113137	-4.1	Ortholog(s) have role in chromatin silencing, sister chromatid cohesion and nucleus localization
CAGL0G10219g	AWP12	-2.05	0.466691	-4.1	Predicted adhesin
CAGL0D00462g		-2.08	0.579828	-4.16	Ortholog(s) have DNA-binding transcription repressor activity, RNA polymerase II-specific, cis-regulatory region sequence-specific DNA binding activity; similar to Sc Ash1
CAGL0L00157g		-2.09865	-0.382824	-4.19731	Predicted adhesin
CAGL0K00693g		-2.15	0.296985	-4.3	Ortholog(s) have protein tyrosine kinase activity
CAGL0K08668g	MET28	-2.15	0.2687	-4.3	Unknown function; predicted to bind DNA
CAGL0D04422g		-2.155	0.148492	-4.31	Ortholog(s) have fluoride transmembrane transporter activity and role in cellular detoxification of fluoride, fluoride export across plasma membrane
CAGL0L05786g		-2.17	0.551543	-4.34	Has domain(s) with predicted nucleic acid binding, zinc ion binding activity
CAGL0L12320g		-2.17363	-0.368597	-4.34726	Ortholog(s) have role in mitochondrial genome maintenance, mitochondrial tRNA 5'-end processing and matrix side of mitochondrial inner membrane localization
CAGL0G07689g		-2.28564	-0.86465	-4.57128	Putative GTPase required for vacuolar protein sorting
CAGL0E02233g		-2.195	0.0636396	-4.39	Unknown function;
CAGL0I03212g		-2.2	1.01823	-4.4	Unknown function; Ortholog of Sc YEL025C
CAGL0M01606g		-2.2	0.0424264	-4.4	Ortholog(s) have SUMO activating enzyme activity
CAGL0C01683g		-2.225	0.0919238	-4.45	Ortholog(s) have ATPase, DNA binding, nucleosome binding, rDNA binding activity
CAGL0H00110g		-2.24085	-0.358056	-4.48171	Predicted adhesin
CAGL0H04983g	PSA1	-2.245	0.0212132	-4.49	Putative mannose-1-phosphate guanyltransferase
CAGL0I05082g		-2.25127	-0.396323	-4.50253	Has domain(s) with predicted nucleic acid binding
CAGL0M10659g		-2.265	0.459619	-4.53	Ortholog(s) have DNA translocase activity and role in positive regulation of transcription by RNA polymerase II
CAGL0M08448g		-2.275	0.0212132	-4.55	Ortholog(s) have mannose-ethanolamine phosphotransferase activity, role in ATP transport, GPI anchor biosynthetic process and endoplasmic reticulum, endoplasmic reticulum membrane, fungal-type cell wall, fungal-type vacuole localization
CAGL0L02123g		-2.3	0.268701	-4.6	Ortholog(s) have DNA translocase activity
CAGL0K00170g	EPA22	-2.365	0.120208	-4.73	Predicted adhesin
CAGL0K13024g	AED1	-2.385	1.22329	-4.77	Predicted adhesin
CAGL0G01452g		-2.39	0.424264	-4.78	Ortholog(s) have role in endoplasmic reticulum to Golgi vesicle-mediated transport and COPII-coated ER to Golgi transport vesicle
CAGL0F08833g		-2.41	1.31522	-4.82	Predicted adhesin
Cgla_YGOB_Anc_3.484		-2.445	0.855599	-4.89	Unknown function
CAGL0F00209g		-2.48	0.919239	-4.96	Has domain(s) with predicted transmembrane transporter activity, role in transmembrane transport and integral component of membrane localization; similar to Sc TNA1
CAGL0C00209g	AWP7	-2.505	0.289914	-5.01	Predicted adhesin
CAGL0D04268g		-2.555	0.473762	-5.11	Ortholog(s) have role in DNA-dependent DNA replication maintenance of fidelity and Ctf18 RFC-like complex localization
CAGL0L09581g		-2.56	1.01823	-5.12	Has domain(s) with predicted dUTP diphosphatase activity, hydrolase activity, magnesium ion binding activity and role in dUMP biosynthetic process, dUTP catabolic process, dUTP metabolic process
CAGL0E00187g		-2.575	0.388909	-5.15	Predicted adhesin
CAGL0E05236g		-2.635	0.898026	-5.27	Has domain(s) with predicted D-threo-aldose 1-dehydrogenase activity
CAGL0C04499g		-2.665	0.586899	-5.33	Ortholog(s) have MAP kinase serine/threonine phosphatase activity, ortholog of Sc Ptc1
CAGL0D00154g	AQY1	-2.81416	-0.906869	-5.62832	Has domain(s) with predicted channel activity, role in transmembrane transport and membrane localization
CAGL0C01859g		-2.82	0.169706	-5.64	Has domain(s) with predicted integral component of membrane localization
CAGL0F08019g		-2.85	1.08894	-5.7	Ortholog(s) have role in positive regulation of binding, protein import into peroxisome matrix and cytosol
CAGL0K00605g		-2.86	0.523259	-5.72	Ortholog(s) have ATP binding, ATPase, DNA replication origin binding, GTP binding, GTPase activity, chromatin binding, protein serine/threonine kinase activity
CAGL0E01353g		-2.97265	-0.562849	-5.9453	Putative high-affinity zinc transporter; similar to Sc Zrt2
CAGL0H08712g		-3.03	0.622254	-6.06	Has domain(s) with predicted phosphatidylinositol binding activity and role in cell communication
CAGL0K10604g	CMK1	-3.05	0.523259	-6.1	Ortholog(s) have calmodulin-dependent protein kinase activity, role in protein phosphorylation, signal transduction and cytoplasm localization
CAGL0K00110g	AWP2	-3.13	0.848528	-6.26	Predicted adhesin
CAGL0E06666g	EPA2	-3.19	1.21622	-6.38	Predicted adhesin
CAGL0A01221g	AQY1	-3.47	0.367696	-6.94	Has domain(s) with predicted channel activity, role in transmembrane transport and membrane localization
CAGL0B01166g	SWI6	-3.995	0.912168	-7.99	Ortholog(s) have DNA-binding transcription activator activity
CAGL0K12056g		-4.125	0.841457	-8.25	Ortholog(s) have structural constituent of ribosome activity and mitochondrial small ribosomal subunit localization
CAGL0A02255g		-4.305	1.13844	-8.61	Unknown function
CAGL0C00110g	EPA6	-4.98	0.254558	-9.96	Predicted adhesin
CAGL0A02299g		-5.48	1.81019	-10.96	Unknown function
							367 elements included exclusively in "c/ FLC":	77 common elements in "c/ FLC" and "S/FLC":		134 elements included exclusively in "S/FLC":
							CAGL0G02563g	CAGL0J11550g		CAGL0E04554g
							CAGL0M12947g	CAGL0E05984g		CAGL0J04202g
							CAGL0G10175g	CAGL0H07469g		CAGL0H02101g
							CAGL0F07953g	CAGL0J00451g		CAGL0J03080g
							CAGL0A02145g	CAGL0L05434g		CAGL0M11000g
							CAGL0L05192g	CAGL0C03740g		CAGL0M12551g
							CAGL0K02629g	CAGL0M06963g		CAGL0F08085g
							CAGL0L13156g	CAGL0J04004g		CAGL0L13354g
							CAGL0I01166g	CAGL0B02563g		CAGL0F00869g
							CAGL0E05456g	CAGL0F02717g		CAGL0M14113g
							CAGL0E06644g	CAGL0F07777g		CAGL0I06050g
							CAGL0I09702g	CAGL0A02002g		CAGL0F08261g
							CAGL0L07766g	CAGL0F04631g		CAGL0C02365g
							Cgla_YGOB_YDR461C-A	CAGL0M14069g		CAGL0E05632g
							CAGL0A01870g	CAGL0D03894g		CAGL0K05247g
							CAGL0B00836g	CAGL0E01815g		CAGL0K09372g
							CAGL0G02629g	CAGL0A02321g		CAGL0F04719g
							CAGL0A01606g	CAGL0C03872g		CAGL0A04829g
							CAGL0I07843g	CAGL0G04433g		CAGL0F00605g
							CAGL0L07678g	CAGL0H00418g		CAGL0G02739g
							CAGL0M01430g	CAGL0G03289g		CAGL0D00946g
							CAGL0G02057g	CAGL0K07337g		CAGL0J05830g
							CAGL0H10076g	CAGL0H00528g		CAGL0D00198g
							DCP_22_7	CAGL0A01826g		CAGL0L13288g
							CAGL0G00264g	CAGL0H06017g		CAGL0F08745g
							CAGL0G08624g	CAGL0K06259g		CAGL0L05258g
							CAGL0J01023g	CAGL0J01331g		CAGL0G02717g
							CAGL0M05775g	CAGL0G02937g		CAGL0M03377g
							CAGL0E01529g	CAGL0K03421g		CAGL0G02849g
							CAGL0I10670g	CAGL0I07865g		CAGL0H02387g
							CAGL0K12804g	CAGL0L04378g		CAGL0M05401g
							CAGL0B04235g	CAGL0K05687g		CAGL0D02728g
							CAGL0E00517g	CAGL0G01738g		CAGL0F06677g
							CAGL0F05709g	CAGL0G05544g		CAGL0B03311g
							CAGL0J02530g	CAGL0I05610g		CAGL0M05445g
							CAGL0I08547g	CAGL0M11902g		CAGL0B01078g
							CAGL0G00242g	CAGL0M02915g		CAGL0K07634g
							CAGL0K03861g	CAGL0G04785g		CAGL0G05335g
							CAGL0G07106g	CAGL0F01419g		CAGL0G06006g
							CAGL0M00484g	CAGL0I04180g		CAGL0F00649g
							CAGL0G02453g	CAGL0L03696g		CAGL0G09977g
							CAGL0D06578g	CAGL0K04235g		CAGL0C02739g
							CAGL0M02409g	CAGL0H09614g		CAGL0H05137g
							CAGL0A03674g	CAGL0H09592g		CAGL0L06512g
							CAGL0L03047g	CAGL0A01716g		CAGL0B03465g
							CAGL0K09922g	CAGL0M12793g		CAGL0A01650g
							CAGL0F03927g	CAGL0H02563g		CAGL0K06105g
							CAGL0I07975g	CAGL0C04191g		CAGL0L10362g
							CAGL0B04125g	CAGL0D05236g		CAGL0G01122g
							CAGL0K02233g	CAGL0A01089g		CAGL0L10582g
							CAGL0K09460g	CAGL0M01760g		CAGL0H03619g
							CAGL0H03377g	CAGL0G05269g		CAGL0G06798g
							CAGL0D04026g	CAGL0E00341g		CAGL0I00286g
							CAGL0F06809g	CAGL0G06182g		CAGL0E05654g
							CAGL0L04950g	CAGL0K02519g		CAGL0F06325g
							CAGL0F00561g	CAGL0B01595g		CAGL0E06380g
							CAGL0L04026g	CAGL0B01012g		CAGL0C03916g
							CAGL0E05478g	CAGL0M08426g		CAGL0J05082g
							CAGL0H02937g	CAGL0H04257g		CAGL0A00341g
							CAGL0H08415g	CAGL0L05720g		CAGL0H08844g
							CAGL0E01837g	CAGL0L09273g		CAGL0M04675g
							CAGL0J01848g	CAGL0D06512g		CAGL0K03575g
							CAGL0M01056g	CAGL0L13299g		CAGL0G01408g
							CAGL0J10252g	CAGL0F01111g		CAGL0B03421g
							CAGL0L10516g	CAGL0K07205g		CAGL0C05027g
							CAGL0F01925g	CAGL0F07865g		CAGL0H10010g
							CAGL0L02871g	CAGL0D02640g		CAGL0H03663g
							CAGL0E03245g	CAGL0L02827g		CAGL0G03047g
							CAGL0L05170g	CAGL0C02321g		CAGL0K07678g
							CAGL0G05742g	CAGL0M10285g		CAGL0J03190g
							CAGL0M10197g	CAGL0C00539g		CAGL0D05082g
							CAGL0B00792g	CAGL0D02552g		CAGL0F04895g
							CAGL0J11066g	CAGL0L05016g		CAGL0B00638g
							CAGL0L10890g	CAGL0I09086g		CAGL0K04631g
							CAGL0M12122g	CAGL0G04763g		CAGL0C04323g
							CAGL0G07535g	CAGL0F04521g		CAGL0M13365g
							CAGL0E01881g	CAGL0D02134g		CAGL0M03399g
							CAGL0I06006g			CAGL0M13189g
							CAGL0D01265g			CAGL0I08943g
							CAGL0K08360g			CAGL0B04675g
							CAGL0A01023g			CAGL0F01265g
							CAGL0A03652g			CAGL0B00616g
							CAGL0G01716g			CAGL0I05390g
							CAGL0M09845g			CAGL0K03459g
							CAGL0F04983g			CAGL0K04939g
							CAGL0L00341g			CAGL0M12474g
							CAGL0I04730g			CAGL0H02893g
							CAGL0J10032g			CAGL0I01122g
							CAGL0J02222g			CAGL0M03025g
							CAGL0I03366g			CAGL0C04587g
							CAGL0K01551g			CAGL0L08426g
							Cgla_YGOB_Anc_7.478			CAGL0G02101g
							CAGL0B01122g			CAGL0K04323g
							CAGL0H04851g			CAGL0L11990g
							CAGL0K02211g			CAGL0M08184g
							CAGL0L06314g			CAGL0H02717g
							CAGL0J03718g			CAGL0K10868g
							CAGL0F08129g			CAGL0M13541g
							CAGL0K10428g			CAGL0C01397g
							CAGL0I10010g			CAGL0D06688g
							CAGL0E02937g			CAGL0G01540g
							CAGL0D02706g			CAGL0I07359g
							CAGL0G04411g			CAGL0I05874g
							CAGL0D05874g			CAGL0F06061g
							CAGL0K02387g			CAGL0E00649g
							CAGL0J09284g			CAGL0F01859g
							CAGL0E05500g			CAGL0G04829g
							CAGL0I00418g			CAGL0F06941g
							CAGL0I07931g			CaglfMp09_ATP6
							CAGL0C05181g			CAGL0M06633g
							CAGL0C00759g			CAGL0B04455g
							CAGL0I03608g			CAGL0I02530g
							CAGL0I09592g			CAGL0M05841g
							CAGL0L02981g			CAGL0H00374g
							CAGL0E03289g			CAGL0M04499g
							CAGL0I01826g			CAGL0H10362g
							CAGL0L03025g			CAGL0M13255g
							CAGL0C04785g			CAGL0K07458g
							CAGL0K03795g			CAGL0J09812g
							CAGL0F04103g			CAGL0C03113g
							CAGL0M06897g			CAGL0I10747g
							CAGL0M03905g			CAGL0K06677g
							CAGL0L02893g			CAGL0I01100g
							CAGL0D05060g			CAGL0C00451g
							CAGL0E01925g			CAGL0K12254g
							CAGL0J10912g			CAGL0I05962g
							CAGL0I01606g			CAGL0K10714g
							CAGL0L08976g			CAGL0D05940g
							CAGL0M13739g			CAGL0M04763g
							CAGL0H03773g			CAGL0B01925g
							CAGL0E02343g			CAGL0L07480g
							CAGL0H02057g			CAGL0L00649g
							CAGL0M07678g			CAGL0K04961g
							CAGL0E00979g			CAGL0B01100g
							CAGL0K09042g
							CAGL0M13915g
							CAGL0J04576g
							CAGL0K09284g
							CAGL0M04829g
							CAGL0B00484g
							CAGL0C01419g
							CAGL0J07700g
							CAGL0L05500g
							CAGL0M09977g
							CAGL0L11176g
							CAGL0J00473g
							CAGL0I02398g
							CAGL0J01265g
							CAGL0K01859g
							CAGL0M14091g
							CAGL0G08041g
							CAGL0M04719g
							CAGL0M11154g
							CAGL0E02585g
							CAGL0C03289g
							CAGL0M11638g
							CAGL0A01782g
							CAGL0D00550g
							CAGL0C01639g
							CAGL0E01859g
							CAGL0A04037g
							CAGL0J10010g
							CAGL0L09669g
							CAGL0L13068g
							CAGL0J09460g
							CAGL0G03905g
							CAGL0L10142g
							CAGL0L04114g
							CAGL0L03872g
							CAGL0J06666g
							CAGL0J03476g
							CAGL0H05709g
							CAGL0L12892g
							CAGL0D05434g
							CAGL0L11660g
							CAGL0J11154g
							CAGL0L11638g
							CAGL0F07645g
							CAGL0L11594g
							CAGL0K02541g
							CAGL0F01023g
							CAGL0H09724g
							CAGL0J07766g
							CAGL0M04279g
							CAGL0I09350g
							CAGL0J01045g
							CAGL0M09801g
							CAGL0K10362g
							CAGL0F02541g
							CAGL0I06490g
							CAGL0A01694g
							CAGL0M13519g
							CAGL0I01254g
							CAGL0D03124g
							CAGL0K04301g
							CAGL0K10164g
							CAGL0B04169g
							CAGL0I03344g
							CAGL0J08844g
							CAGL0J11286g
							CAGL0E05676g
							CAGL0J04598g
							CAGL0F06853g
							CAGL0D04884g
							CAGL0J00957g
							CAGL0J05698g
							CAGL0J00891g
							CAGL0K09416g
							CAGL0J05412g
							CAGL0K06215g
							CAGL0L03846g
							CAGL0D00880g
							CAGL0E03069g
							CAGL0D05500g
							CAGL0K01991g
							CAGL0M08514g
							CAGL0K07007g
							CAGL0J11088g
							CAGL0A04257g
							CAGL0C03369g
							CAGL0E02321g
							CAGL0G06248g
							CAGL0I09724g
							CAGL0J02376g
							CAGL0J02816g
							CAGL0F00913g
							CAGL0H06985g
							CAGL0G07975g
							CAGL0B00352g
							CAGL0D00220g
							CAGL0I10560g
							CAGL0L00671g
							CAGL0M13167g
							CAGL0I03630g
							CAGL0L02849g
							CAGL0E05874g
							CAGL0E05764g
							CAGL0G02783g
							CAGL0M03751g
							CAGL0I07051g
							CAGL0J10890g
							CAGL0M01210g
							CAGL0K03157g
							CAGL0L04664g
							CAGL0F07139g
							CAGL0M11110g
							CAGL0J09746g
							CAGL0I04290g
							CAGL0A01628g
							CAGL0G00924g
							CAGL0F07117g
							CAGL0D03674g
							CAGL0F06523g
							CAGL0C00737g
							CAGL0B01232g
							CAGL0M09757g
							CAGL0B01397g
							CAGL0C00275g
							CAGL0H07183g
							CAGL0D00836g
							CAGL0K12144g
							CAGL0L08756g
							CAGL0L12254g
							CAGL0I02574g
							CAGL0G04983g
							CAGL0G01991g
							CAGL0H02079g
							CAGL0I02376g
							CAGL0H09504g
							CAGL0B01881g
							CAGL0D00682g
							CAGL0F02299g
							CAGL0I09152g
							CAGL0D05588g
							CAGL0I09790g
							CAGL0I08613g
							CAGL0K08888g
							CAGL0M10527g
							CAGL0B00220g
							CAGL0J00275g
							CAGL0A04213g
							CAGL0M01276g
							CAGL0M02805g
							CAGL0J00869g
							CAGL0G02761g
							CAGL0H10406g
							CAGL0G01056g
							CAGL0A04015g
							CAGL0I03234g
							CAGL0K02497g
							CAGL0D02838g
							CAGL0H08019g
							CAGL0F02431g
							CAGL0G03443g
							CAGL0J09966g
							CAGL0L08206g
							CAGL0L10164g
							CAGL0G03531g
							CAGL0H10384g
							CAGL0B02431g
							CAGL0G07018g
							CAGL0J03740g
							CAGL0F07557g
							CAGL0I07711g
							CAGL0H09064g
							CAGL0E05522g
							CAGL0D05016g
							CAGL0I07667g
							CAGL0H02189g
							CAGL0A01584g
							CAGL0F07095g
							CAGL0F04433g
							CAGL0L11770g
							CAGL0C02101g
							CAGL0B01265g
							CAGL0B04433g
							CAGL0M05269g
							CAGL0C02343g
							CAGL0H07975g
							CAGL0E00363g
							CAGL0K09614g
							CAGL0I08393g
							CAGL0K05555g
							CAGL0M03487g
							CAGL0J03630g
							CAGL0E01573g
							CAGL0L12672g
							CAGL0F04499g
							CAGL0M11660g
							CAGL0B02409g
							CAGL0J00253g
							CAGL0I07249g
							CAGL0M11616g
							CAGL0K10010g
							CAGL0I08591g
							CAGL0H03685g
							CAGL0F00407g
							CAGL0A01760g
							Cgla_YGOB_Anc_7.246
							CAGL0H01419g
							CAGL0E01903g
							CAGL0M07766g
							CAGL0I05654g
							CAGL0D01562g
							CAGL0G05984g
							CAGL0J00363g
							CAGL0D06600g
							CAGL0G01166g
							CAGL0F01485g
							CAGL0F04807g
							CAGL0G10021g
							CAGL0H00440g
							CAGL0M01804g
							CAGL0C03223g
							CAGL0M12144g
							CAGL0G04741g
							CAGL0B01947g
							CAGL0E05390g
							CAGL0M06325g
							CAGL0J08184g
							CAGL0I10340g
							CAGL0J09614g
							CAGL0J08294g
							CAGL0L06754g
							CAGL0K10780g
							CAGL0G09064g
							CAGL0H07249g

## Sheet: TableS8
Table S8. Comparative transcriptomic profiling of C. glabrata ISTB218 isolate, in comparison with the reference strain CBS138. Cells of both strains were cultivated as detailed in materials and methods and in this table are shown genes exhibiting a differential expression in the two strains above 2-fold. The effect of gene deletion in C. glabrata tolerance to azoles is also indicated based on pre…
ORF name	Gene name	Log2 FC (mRNA FFUL674/mRNA CBS138)	Std dev	mRNA FFUL218/mRNA CBS138	Function	Effect of gene deletion in C. glabrata azole tolerance
CAGL0A02299g		-7.29559	0.564443	-14.5912	Protein of unknown function	Deletion results in increased tolerance
CAGL0C00110g	EPA6	-6.18945	0.11299	-12.3789	Sub-telomerically encoded adhesin with a role in cell adhesion; binds to ligands containing a terminal galactose residue; expressed during murine urinary tract infection, biofilm-upregulated; belongs to adhesin cluster I	No change in tolerance to azoles
CAGL0L05786g		-5.74303	0.0839228	-11.4861	Has domain(s) with predicted nucleic acid binding, zinc ion binding activity	Not tested
CAGL0C01859g		-5.33471	0.105142	-10.6694	Has domain(s) with predicted integral component of membrane localization	Not tested
CAGL0A02255g		-5.03382	0.88787	-10.0676	Protein of unknown function	No change in tolerance to azoles
CAGL0A01221g	AQY1	-4.5256	0.083852	-9.05121	Has domain(s) with predicted channel activity, role in transmembrane transport and membrane localization	Not tested
CAGL0E05236g		-3.94395	0.386602	-7.8879	Protein of unknown function	No change in tolerance to azoles
CAGL0K00170g	EPA22	-3.83772	0.230029	-7.67544	Putative adhesin-like protein; belongs to adhesin cluster I	No change in tolerance to azoles	252
CAGL0B01166g	SWI6	-3.79751	0.166166	-7.59501	Ortholog(s) have DNA-binding transcription activator activity, RNA polymerase II-specific, RNA polymerase II proximal promoter sequence-specific DNA binding, transcription coactivator activity	No change in tolerance to azoles
CAGL0C00253g		-3.54926	0.258975	-7.09852	Putative cell wall adhesin; belongs to adhesin cluster III; predicted GPI anchor; contains 6 tandem repeats	No change in tolerance to azoles
CAGL0K00110g	AWP2	-3.50268	0.179802	-7.00536	Putative adhesin; identified in cell wall extracts by mass spectrometry; belongs to adhesin cluster V; predicted GPI-anchor	No change in tolerance to azoles
CAGL0I04246g	SUT1	-3.2737	0.741492	-6.54739	Putative transcription factor involved in sterol uptake; gene is upregulated in azole-resistant strain	Not tested
CAGL0J00407g		-3.11559	0.120598	-6.23118	Ortholog(s) have inorganic cation transmembrane transporter activity and role in cellular cobalt ion homeostasis, cellular manganese ion homeostasis, cobalt ion transport, manganese ion transport	Not tested
CAGL0B02838g	MUP1	-2.96449	1.93533	-5.92898	Protein of unknown function	Not tested
CAGL0C04499g		-2.75284	0.315221	-5.50568	Ortholog(s) have MAP kinase serine/threonine phosphatase activity, magnesium-dependent protein serine/threonine phosphatase activity, protein serine/threonine phosphatase activity	No change in tolerance to azoles
CAGL0H10626g	AWP13	-2.73075	0.37505	-5.4615	Predicted cell wall adhesin with a role in adhesion; belongs to adhesin cluster III; predicted GPI anchor; contains tandem repeats	No change in tolerance to azoles
CAGL0I04378g		-2.68632	0.405172	-5.37264	Ortholog(s) have mannosyltransferase activity, role in cell wall mannoprotein biosynthetic process, protein N-linked glycosylation and Golgi apparatus localization	No change in tolerance to azoles
CAGL0D02640g		-2.65659	0.445213	-5.31319	Has domain(s) with predicted transmembrane transporter activity, role in transmembrane transport and integral component of membrane, membrane localization	No change in tolerance to azoles
CAGL0M01606g		-2.62231	0.417562	-5.24463	Ortholog(s) have SUMO activating enzyme activity, role in protein sumoylation and SUMO activating enzyme complex, nucleus localization	No change in tolerance to azoles
CAGL0B03949g		-2.59307	0.0948516	-5.18615	Protein of unknown function	No change in tolerance to azoles
CAGL0E06666g	EPA2	-2.5858	0.87162	-5.1716	Epithelial adhesion protein; predicted GPI-anchor; belongs to adhesin cluster I	No change in tolerance to azoles
CAGL0B00616g		-2.53075	1.19227	-5.06151	Ecm33-family protein with a predicted role in cell wall biogenesis and organization; predicted GPI-anchor	Not tested
CAGL0K00583g		-2.52272	0.33653	-5.04544	Ortholog(s) have fatty acid elongase activity and role in fatty acid elongation	Not tested
CAGL0I05148g	DLD1	-2.48178	0.987109	-4.96357	D-lactate ferricytochrome C oxidoreductase	Not tested
CAGL0C04004g		-2.47681	0.926548	-4.95362	Has domain(s) with predicted transferase activity, transferring glycosyl groups activity and role in protein glycosylation	Not tested
CAGL0B00616g		-2.44527	1.32516	-4.89055	Ecm33-family protein with a predicted role in cell wall biogenesis and organization; predicted GPI-anchor	No change in tolerance to azoles
CAGL0B02882g	BMT2	-2.43614	0.0310412	-4.87228	Beta mannosyltransferase; transmembrane domain protein similar to C. albicans WRY family; gene is downregulated in azole-resistant strain	Not tested
CAGL0I00902g		-2.42923	0.146879	-4.85846	Has domain(s) with predicted DNA-binding transcription factor activity, sequence-specific DNA binding, zinc ion binding activity and role in regulation of transcription	Not tested
CAGL0K03157g	DUR31	-2.3666	0.850926	-4.7332	Putative plasma membrane polyamine transporter	Not tested
CAGL0I05060g		-2.36637	0.0999861	-4.73275	Ortholog(s) have sequence-specific DNA binding activity and role in chromatin silencing at rDNA, chromatin silencing at telomere, regulation of transcription by RNA polymerase II, transfer RNA gene-mediated silencing	Not tested
CAGL0G10219g	AWP12	-2.36519	0.423247	-4.73038	Adhesin-like protein with 5 tandem repeats; belongs to adhesin cluster VII; predicted GPI-anchor; similarity to S. cerevisiae flocculins, cell wall proteins that mediate adhesion	No change in tolerance to azoles
CAGL0L00157g		-2.34919	0.322335	-4.69838	Putative adhesin-like protein; multiple tandem repeats; predicted GPI-anchor; belongs to adhesin cluster III	Deletion results in increased susceptibility
CAGL0I05934g		-2.34114	0.590696	-4.68229	Ortholog(s) have ubiquitin-protein transferase regulator activity and role in cellular response to water deprivation, stress-induced homeostatically regulated protein degradation pathway	Not tested
CAGL0H00110g		-2.2986	0.216621	-4.59719	Adhesin-like protein with internal repeats; predicted GPI-anchor; likely a C-terminal fragment of a single ORF with CAGL0H00132g; belongs to adhesin cluster V	No change in tolerance to azoles
CAGL0I07249g		-2.29027	1.1339	-4.58055	Putative GTPase-activating protein involved in cell wall and cytoskeleton homeostasis; gene is upregulated in azole-resistant strain	Not tested
CAGL0F01749g		-2.28796	0.326476	-4.57592	Putative serine hydroxymethyltransferase; protein differentially expressed in azole resistant strain	Not tested
CAGL0C00231g		-2.23511	0.682318	-4.47022	Has domain(s) with predicted nucleobase transmembrane transporter activity, role in nucleobase transport, transmembrane transport and membrane localization	Deletion results in increased susceptibility
CAGL0F04917g		-2.20043	1.17928	-4.40086	Putative regulatory subunit for protein phosphatase; gene is upregulated in azole-resistant strain	Not tested
CAGL0L10912g	TPO4	-2.19557	0.596384	-4.39114	Ortholog(s) have spermidine transmembrane transporter activity, spermine transmembrane transporter activity, role in spermidine transport, spermine transport and fungal-type vacuole membrane, plasma membrane localization	Not tested
CAGL0F07029g	MET13	-2.10505	3.22664	-4.2101	Ortholog(s) have methylenetetrahydrofolate reductase (NAD(P)H) activity and role in methionine biosynthetic process, one-carbon metabolic process	Not tested
CAGL0K13024g	AED1	-2.08852	0.161844	-4.17704	Adhesin-like protein required for adherence to endothelial cells; identified in cell wall extracts by mass spectrometry; belongs to adhesin cluster III; predicted GPI anchor; 6 tandem repeats; expressed more in stationary growth pHase	No change in tolerance to azoles
CAGL0L02123g	SNF5	-2.08484	0.471751	-4.16968	Ortholog(s) have DNA translocase activity, RNA polymerase II activating transcription factor binding activity	Not tested
CAGL0F02827g		-2.06628	0.191872	-4.13257	Ortholog(s) have role in endoplasmic reticulum unfolded protein response, ubiquitin-dependent ERAD pathway and Doa10p ubiquitin ligase complex, Hrd1p ubiquitin ligase ERAD-L complex, endoplasmic reticulum localization	Not tested
CAGL0B02794g		-2.05555	0.155534	-4.11109	Ortholog(s) have (S)-2-(5-amino-1-(5-phospho-D-ribosyl)imidazole-4-carboxamido)succinate AMP-lyase (fumarate-forming) activity, N6-(1,2-dicarboxyethyl)AMP AMP-lyase (fumarate-forming) activity	No change in tolerance to azoles
CAGL0D04422g		-2.04361	0.367894	-4.08723	Ortholog(s) have fluoride transmembrane transporter activity and role in cellular detoxification of fluoride, fluoride export across plasma membrane	No change in tolerance to azoles
CAGL0B01875g		-2.04056	2.59806	-4.08112	Ortholog(s) have mitochondrial inner membrane, mitochondrial respirasome, mitochondrial respiratory chain complex IV localization	No change in tolerance to azoles
CAGL0H04037g		-1.99636	0.190163	-3.99273	Ortholog(s) have heat shock protein binding, protein phosphatase regulator activity, role in mitotic spindle assembly checkpoint, response to heat and protein phosphatase type 1 complex localization	Not tested
CAGL0J06402g		-1.9886	0.77523	-3.9772	Ortholog(s) have homocitrate synthase activity, role in DNA repair, histone displacement, lysine biosynthetic process via aminoadipic acid and nucleus localization	Not tested
CAGL0K08338g		-1.9802	0.89024	-3.9604	Protein of unknown function	Not tested
CAGL0A02211g	HXT6/7	-1.97104	0.0495263	-3.94208	Ortholog(s) have glucose transmembrane transporter activity, pentose transmembrane transporter activity, role in glucose transmembrane transport and plasma membrane localization	Not tested
CAGL0K00319g		-1.95399	0.795305	-3.90798	Ortholog(s) have ATP binding, magnesium ion binding, ubiquitin activating enzyme activity, role in protein ubiquitination and cytoplasm, nucleus localization	No change in tolerance to azoles
CAGL0K06963g	ROT2	-1.91477	0.36936	-3.82955	Ortholog(s) have glucan 1,3-alpha-glucosidase activity	Not tested
CAGL0M10659g		-1.88825	0.0358799	-3.7765	Ortholog(s) have DNA translocase activity and role in positive regulation of transcription by RNA polymerase II, positive regulation of transcription from RNA polymerase II promoter in response to amino acid starvation	No change in tolerance to azoles
CAGL0D00198g		-1.87685	1.28065	-3.7537	Ortholog(s) have (R,R)-butanediol dehydrogenase activity and role in alcohol metabolic process, butanediol biosynthetic process	Not tested
CAGL0C03289g	YBT1	-1.86747	0.577987	-3.73493	Putative ABC transporter involved in bile acid transport; gene is upregulated in azole-resistant strain	Not tested
CAGL0D00462g		-1.853	0.326678	-3.706	Ortholog(s) have DNA-binding transcription factor activity, DNA-binding transcription repressor activity, RNA polymerase II-specific, proximal promoter sequence-specific DNA binding activity	Not tested
CAGL0A02343g		-1.84139	2.62051	-3.68279	Protein of unknown function	No change in tolerance to azoles
CAGL0E03894g	FPS2	-1.80149	0.925257	-3.60298	Glycerol transporter; involved in flucytosine resistance; double fps1/fps2 mutant accumulates glycerol, has constitutive cell wall stress, is hypersensitive to caspofungin in vitro and in vivo	Not tested
CAGL0L04862g		-1.7111	0.0640979	-3.42221	Ortholog(s) have structural constituent of nuclear pore activity and role in NLS-bearing protein import into nucleus, nuclear pore organization, protein import into nucleus, protein localization to nuclear inner membrane	No change in tolerance to azoles
CAGL0H00759g		-1.69279	0.450701	-3.38558	Has domain(s) with predicted ATP binding, ATP-dependent 3'-5' DNA helicase activity, ATP-dependent helicase activity, helicase activity, nucleic acid binding activity and role in DNA recombination, DNA repair, DNA replication	Not tested
CAGL0G01056g	GAS3	-1.6902	0.583566	-3.38041	Putative glycoside hydrolase of the Gas/Phr family; predicted GPI-anchor	Not tested
CAGL0F08745g		-1.66713	2.14804	-3.33427	Ortholog(s) have role in cellular response to desiccation and cytoplasm localization	Not tested
CAGL0K00715g	RTA1	-1.65857	0.809884	-3.31715	Putative protein involved in 7-aminocholesterol resistance; gene is upregulated in azole-resistant strain	Not tested
CAGL0J07018g		-1.65761	0.399825	-3.31523	Ortholog of S. cerevisiae YPL109C	Not tested
CAGL0K00231g		-1.65456	0.0827668	-3.30912	Ortholog(s) have 5-oxoprolinase (ATP-hydrolyzing) activity and role in glutathione metabolic process	Not tested
CAGL0M08844g		-1.63498	0.417889	-3.26996	Ortholog(s) have protein-lysine N-methyltransferase activity, role in peptidyl-lysine monomethylation, regulation of cytoplasmic translation in response to stress and nucleus localization	Not tested
CAGL0K01441g		-1.63337	0.317163	-3.26674	Ortholog(s) have RNA binding activity, role in spliceosomal complex assembly and U2-type prespliceosome localization	No change in tolerance to azoles
CAGL0M01188g		-1.62402	0.550424	-3.24804	Ortholog(s) have structural molecule activity and role in chromatin remodeling, histone exchange, regulation of phenotypic switching by regulation of transcription from RNA polymerase II promoter	Not tested
CAGL0M13365g		-1.62057	1.46642	-3.24113	Ortholog(s) have role in ascospore wall assembly, ascospore-type prospore membrane assembly and prospore membrane, prospore membrane leading edge localization	Not tested
CAGL0L00539g		-1.60675	0.695396	-3.2135	Ortholog(s) have role in ubiquitin-dependent ERAD pathway	Not tested
CAGL0G06424g		-1.59696	0.688687	-3.19393	Ortholog(s) have phosphatidylinositol-3-phosphate binding activity, role in late endosome to Golgi transport, protein localization and cytosol, endosome localization	Not tested
CAGL0L01419g		-1.5915	0.366514	-3.183	Ortholog(s) have ATPase activity, coupled to transmembrane movement of ions, phosphorylative mechanism, calcium-transporting ATPase activity	No change in tolerance to azoles
CAGL0E01419g	YPS2	-1.58933	0.155623	-3.17865	Putative aspartic protease; predicted GPI-anchor; member of a YPS gene cluster that is required for virulence in mice; induced in response to low pH and high temperature	Not tested
CAGL0I05170g	CST6	-1.58682	0.120276	-3.17364	bZIP domain-containing protein involved in regulation of biofilm formation; negatively regulates expression of the EPA6 adhesin independently of Yak1p/Sir4p signaling; regulates carbonic anhydrase Nce103p in response to carbon dioxide	Deletion results in increased tolerance
CAGL0H01221g		-1.58091	0.187876	-3.16182	Ortholog(s) have RNA polymerase II complex binding activity and role in DNA damage response, detection of DNA damage, mRNA 3'-end processing, negative regulation of transposition, RNA-mediated	No change in tolerance to azoles
CAGL0F08393g		-1.57136	0.290502	-3.14272	Ortholog(s) have role in Golgi to vacuole transport, protein targeting to vacuole and AP-3 adaptor complex localization	Not tested
CAGL0A00209g		-1.56973	0.268839	-3.13946	Ortholog(s) have dolichyl-diphosphooligosaccharide-protein glycotransferase activity, role in protein N-linked glycosylation and oligosaccharyltransferase complex, plasma membrane localization	No change in tolerance to azoles
CAGL0K00759g	ZPR1	-1.5686	0.0554559	-3.1372	Protein with similarity to M. musculus zinc finger protein Zpr1p	No change in tolerance to azoles
CAGL0H05181g		-1.55333	0.310142	-3.10666	Putative component of ESCRT-I complex involved in protein trafficking; gene is upregulated in azole-resistant strain	Not tested
CAGL0L04466g		-1.54555	0.724487	-3.09111	Ortholog(s) have GTPase activity and role in cellular response to drug, endoplasmic reticulum membrane fusion, endoplasmic reticulum organization, hexose transmembrane transport, membrane organization, pathogenesis	Not tested
CAGL0F04125g		-1.54408	0.126449	-3.08816	Unknown	Not tested
CAGL0A02233g	HXT4/6/7	-1.53734	0.00210633	-3.07469	Ortholog(s) have glucose transmembrane transporter activity and membrane, plasma membrane localization	Not tested
CAGL0J03740g		-1.53414	1.54906	-3.06828	Ortholog(s) have role in ascospore formation, ascospore wall assembly, positive regulation of protein autophosphorylation and ascospore wall localization	Not tested
CAGL0C04026g		-1.53283	0.36237	-3.06565	Has domain(s) with predicted transferase activity, transferring glycosyl groups activity and role in protein glycosylation	Not tested
CAGL0H02959g	TOS8	-1.51914	0.580598	-3.03828	Ortholog(s) have chromatin binding activity, role in filamentous growth and nuclear chromatin localization	Not tested
CAGL0E03828g		-1.51472	0.244161	-3.02944	Ortholog(s) have molecular adaptor activity	Not tested
CAGL0K02519g		-1.51059	1.04643	-3.02117	Protein of unknown function	No change in tolerance to azoles
CAGL0L09251g		-1.50942	0.254949	-3.01885	Ortholog(s) have role in positive regulation of transcription by RNA polymerase II, response to salt stress and cytoplasm localization	Not tested
CAGL0K01419g		-1.50873	0.617991	-3.01747	Ortholog(s) have RNA binding activity, role in mRNA processing, mitochondrial translation and mitochondrion localization	Deletion results in increased tolerance
CAGL0E06446g		-1.49087	0.229521	-2.98174	Ortholog(s) have RNA lariat debranching enzyme activity and role in RNA catabolic process, mRNA cis splicing, via spliceosome, mRNA splicing, via spliceosome, pseudohyphal growth, snoRNA metabolic process, transposition, RNA-mediated	Not tested
CAGL0K00495g		-1.48147	0.169429	-2.96294	Ortholog(s) have role in deadenylation-dependent decapping of nuclear-transcribed mRNA, mRNA catabolic process, negative regulation of translation and cytoplasmic stress granule, polysome localization	Not tested
CAGL0I08745g		-1.47759	0.565597	-2.95518	Ortholog(s) have phosphatidylserine decarboxylase activity	Not tested
CAGL0K07942g		-1.46836	0.397242	-2.93672	Protein of unknown function	Not tested
CAGL0K04301g		-1.45609	0.610373	-2.91219	Putative mitochondrial Ser/Thr protein kinase; gene is upregulated in azole-resistant strain	Not tested
CAGL0I05698g		-1.45298	0.270425	-2.90596	Has domain(s) with predicted 6-phosphofructokinase activity, ATP binding activity, role in fructose 6-phosphate metabolic process, glycolytic process and 6-phosphofructokinase complex, cytoplasm localization	Not tested
CAGL0L12320g		-1.45137	0.519964	-2.90273	Ortholog(s) have role in mitochondrial genome maintenance, mitochondrial tRNA 5'-end processing and matrix side of mitochondrial inner membrane localization	Deletion results in increased tolerance
CAGL0I10147g	PWP1	-1.44883	0.593812	-2.89766	Protein with 32 tandem repeats; putative adhesin-like protein; belongs to adhesin cluster II	No change in tolerance to azoles
CAGL0G07689g		-1.44615	0.609665	-2.89229	Putative GTPase required for vacuolar protein sorting; gene is upregulated in azole-resistant strain	Not tested
CAGL0C00968g		-1.43635	0.735514	-2.8727	adhesion-like protein with a predicted role in cell adhesion; belongs to adhesin cluster VII; predicted GPI-anchor	Not tested
CAGL0F05841g		-1.42696	0.590416	-2.85392	Ortholog(s) have role in adaptation of signaling pathway by response to pheromone involved in conjugation with cellular fusion, protein deneddylation and COP9 signalosome localization	Not tested
CAGL0F00957g	TPD3	-1.41301	0.180127	-2.82602	Putative serine/threonine protein phosphatase 2A, regulatory chain A	Deletion results in increased tolerance
CAGL0L08602g		-1.40664	0.202532	-2.81328	Ortholog(s) have exopolyphosphatase activity, role in polyphosphate catabolic process and cytoplasm localization	Not tested
CAGL0L06446g		-1.4029	1.17988	-2.8058	Unknown	Not tested
CAGL0M03795g		-1.39502	0.501325	-2.79005	Has domain(s) with predicted nucleic acid binding, nucleotide binding activity	No change in tolerance to azoles
CAGL0K00605g		-1.39371	0.394558	-2.78742	Ortholog(s) have ATP binding, ATPase activity, DNA replication origin binding, GTP binding, GTPase activity, chromatin binding, protein serine/threonine kinase activity	No change in tolerance to azoles
CAGL0F02431g	ACO2	-1.37154	0.353752	-2.74308	Ortholog(s) have role in mitochondrial translation and cytoplasm, mitochondrion, nucleus localization	Not tested
CAGL0K01023g		-1.36614	0.534197	-2.73229	Ortholog(s) have structural constituent of ribosome activity and mitochondrial small ribosomal subunit localization	Not tested
CAGL0F08019g	PEX21	-1.36248	0.873028	-2.72497	Ortholog(s) have role in positive regulation of binding, protein import into peroxisome matrix and cytosol, peroxisome localization	Not tested
CAGL0B01078g		-1.3594	1.33357	-2.7188	Putative protein; gene is upregulated in azole-resistant strain	Not tested
CAGL0J03520g		-1.35629	0.418716	-2.71258	Has domain(s) with predicted peptidyl-prolyl cis-trans isomerase activity and role in protein folding, protein peptidyl-prolyl isomerization	Not tested
CAGL0H08261g		-1.35481	1.21192	-2.70963	Ortholog(s) have role in autophagy of mitochondrion	Not tested
CAGL0G00528g		-1.34462	0.340372	-2.68923	Ortholog(s) have chromatin binding, histone binding activity	Not tested
CAGL0K00649g		-1.34459	0.0623544	-2.68918	Ortholog(s) have role in endoplasmic reticulum to Golgi vesicle-mediated transport and endoplasmic reticulum, integral component of membrane localization	Not tested
CAGL0F02585g		-1.33844	0.50283	-2.67688	Ortholog(s) have nicotinamide riboside hydrolase activity, nicotinic acid riboside hydrolase activity, ribosylpyrimidine nucleosidase activity, uridine nucleosidase activity	Not tested
CAGL0C04763g		-1.3381	0.297155	-2.6762	Has domain(s) with predicted integral component of membrane localization	Not tested
CAGL0M01474g		-1.33136	0.0316606	-2.66272	Ortholog(s) have TBP-class protein binding, chromatin binding, core promoter binding, sequence-specific DNA binding, transcription coactivator activity, transcription corepressor activity	No change in tolerance to azoles
CAGL0H04873g		-1.32168	0.295515	-2.64336	Ortholog(s) have sequence-specific DNA binding activity and role in filamentous growth	Not tested
CAGL0M10263g		-1.32123	0.237775	-2.64245	Protein of unknown function	Not tested
CAGL0K01199g		-1.3209	0.282831	-2.64179	Ortholog(s) have ubiquitin binding, ubiquitin protein ligase binding activity and role in positive regulation of cellular response to hypoxia, regulation of protein glycosylation, sterol regulatory element binding protein cleavage	Not tested
CAGL0K11616g		-1.32068	1.10313	-2.64137	Putative mitochondrial inner membrane transporter; gene is upregulated in azole-resistant strain	Not tested
CAGL0L06512g		-1.32005	1.79931	-2.6401	Ortholog(s) have role in meiotic cell cycle	Not tested
CAGL0G01606g		-1.31892	0.386587	-2.63784	Has domain(s) with predicted ATP binding, alanine-tRNA ligase activity, aminoacyl-tRNA ligase activity, role in alanyl-tRNA aminoacylation, tRNA aminoacylation and cytoplasm localization	Not tested
CAGL0G01848g		-1.31884	0.0179433	-2.63769	Ortholog(s) have role in mRNA splicing, via spliceosome and Prp19 complex, U2-type catalytic step 1 spliceosome localization	Not tested
CAGL0F07513g		-1.31638	0.0160048	-2.63275	Ortholog(s) have role in aerobic respiration	Not tested
CAGL0L01067g		-1.31362	0.0477535	-2.62724	Ortholog(s) have cytoplasm localization	Not tested
CAGL0M04301g		-1.3108	0.0441739	-2.6216	Ortholog(s) have low-affinity zinc ion transmembrane transporter activity, role in zinc ion import across plasma membrane and plasma membrane localization	Not tested
CAGL0M10021g		-1.3102	0.581978	-2.62041	Protein of unknown function	Not tested
CAGL0K01155g		-1.30777	0.630739	-2.61555	Ortholog of S. cerevisiae YGR079W	Not tested
CAGL0E06644g	EPA1	-1.30777	0.0921899	-2.61554	Sub-telomerically encoded adhesin with a role in cell adhesion; GPI-anchored cell wall protein; N-terminal ligand binding domain binds to ligands containing a terminal galactose residue; belongs to adhesin cluster I	Not tested
CAGL0L02519g		-1.30737	0.840493	-2.61474	Has domain(s) with predicted role in transmembrane transport and integral component of membrane localization	No change in tolerance to azoles
CAGL0C00319g		-1.30294	0.235931	-2.60588	Ortholog(s) have carboxypeptidase activity, role in nitrogen compound metabolic process, proteolysis involved in cellular protein catabolic process and fungal-type vacuole lumen localization	Not tested
CAGL0F05577g		-1.30202	0.175217	-2.60403	Ortholog(s) have ATP-dependent RNA helicase activity, RNA binding, RNA strand annealing activity	Deletion results in increased tolerance
CAGL0K03003g		-1.27987	0.325204	-2.55975	Ortholog(s) have DNA-binding transcription factor activity, RNA polymerase II-specific and RNA polymerase II activating transcription factor binding, more	Not tested
CAGL0C01683g		-1.2778	0.118593	-2.5556	Ortholog(s) have ATPase activity, DNA binding, nucleosome binding, rDNA binding, transcription regulatory region DNA binding activity	Not tested
CAGL0K06809g		-1.27221	0.285939	-2.54442	Has domain(s) with predicted acetyl-CoA transmembrane transporter activity and integral component of membrane localization	Not tested
CAGL0L06820g		-1.26898	0.11155	-2.53795	Ortholog(s) have protein serine/threonine kinase activity and role in cellular response to heat, cellular response to salt stress, protein phosphorylation, regulation of protein catabolic process	Not tested
CAGL0K00825g		-1.26768	0.342137	-2.53536	Has domain(s) with predicted phosphatase activity, phosphoserine phosphatase activity and role in L-serine biosynthetic process, metabolic process	No change in tolerance to azoles
CAGL0D05236g		-1.26481	1.50931	-2.52962	Has domain(s) with predicted nucleic acid binding, nucleotide binding activity	Not tested
CAGL0K00979g		-1.25542	0.0181807	-2.51083	Ortholog(s) have role in cellular response to drug, cellular response to neutral pH, cellular response to starvation, filamentous growth and filamentous growth of a population of unicellular organisms, more	Not tested
CAGL0J04950g		-1.25237	0.0953644	-2.50474	Ortholog(s) have role in mitotic recombination and cellular bud localization	Not tested
CAGL0J04158g	RCN2	-1.24888	0.787526	-2.49777	Regulator of calcineurin; regulated by the calcineurin-Crz1p pathway; acts as a feedback negative regulator of calcineurin-dependent signaling	Not tested
CAGL0D01980g		-1.24121	0.207255	-2.48243	Ortholog(s) have sterol esterase activity, role in cellular lipid metabolic process, sterol metabolic process and integral component of membrane, lipid droplet localization	Not tested	Sterols cannot be degraded, but are either stored in the form of steryl esters (SE) in LPs or secreted into the medium as sterol acetates; In another detoxification mechanism, sterols are acetylated by Atf2 in the ER and then transported to the PM, where they are secreted via Pry1 and Pry2 (pathogen-related yeast proteins) [51,52]. Under normal conditions, newly synthesized ergosterol is acetylat…
CAGL0H10428g		-1.24041	0.561911	-2.48082	Ortholog(s) have phosphatidylinositol-3-phosphate binding activity and role in autophagy of mitochondrion, early endosome to Golgi transport, macroautophagy, protein localization by the Cvt pathway	Not tested
CAGL0K13002g	AED2	-1.24032	0.142547	-2.48065	Putative adhesin; predicted GPI-anchor; belongs to adhesin cluster III	Not tested
CAGL0I04004g		-1.2397	0.128643	-2.47939	Protein of unknown function	Not tested
CAGL0D01452g		-1.23963	0.223699	-2.47926	Ortholog(s) have calcium ion binding activity, role in regulation of cell cycle, spore germination and hyphal tip, spitzenkorper localization	No change in tolerance to azoles
CAGL0D03916g		-1.23092	0.12134	-2.46184	Ortholog(s) have role in box C/D snoRNP assembly, protein folding, rRNA processing and R2TP complex localization	Not tested
CAGL0D04246g		-1.227	0.479264	-2.45401	Ortholog(s) have role in late endosome to vacuole transport, protein transport to vacuole involved in ubiquitin-dependent protein catabolic process via the multivesicular body sorting pathway	Not tested
CAGL0H05005g		-1.2239	0.554418	-2.44779	Ortholog(s) have phosphatidylinositol transporter activity	Not tested
CAGL0H04983g	PSA1	-1.22343	0.651776	-2.44686	Putative mannose-1-phosphate guanyltransferase	Not tested
CAGL0K09394g		-1.22236	0.127037	-2.44471	Ortholog(s) have GTPase activity, role in cellular response to drug, early endosome to Golgi transport, exocytosis, vesicle-mediated transport and Golgi apparatus, endosome localization	Not tested
CAGL0K00913g		-1.22092	0.74502	-2.44185	Ortholog(s) have formate-tetrahydrofolate ligase activity, methenyltetrahydrofolate cyclohydrolase activity, methylenetetrahydrofolate dehydrogenase (NADP+) activity, single-stranded DNA binding activity	Deletion results in increased tolerance
CAGL0F05885g		-1.21816	0.197504	-2.43631	Ortholog(s) have phospholipid binding, protein membrane anchor activity	Not tested
CAGL0L05302g		-1.21469	0.542754	-2.42937	Ortholog(s) have phosphopantothenoylcysteine decarboxylase activity, role in coenzyme A biosynthetic process and CoA-synthesizing protein complex, phosphopantothenoylcysteine decarboxylase complex localization	No change in tolerance to azoles
CAGL0K07788g		-1.21444	0.328843	-2.42887	Ortholog(s) have L-aminoadipate-semialdehyde dehydrogenase activity and role in lysine biosynthetic process, lysine biosynthetic process via aminoadipic acid	Not tested
CAGL0B04235g	SCP12	-1.2142	1.59445	-2.42841	Protein with a predicted role in maintenance of ploidy	Not tested
CAGL0E05192g		-1.21172	0.410538	-2.42345	Protein of unknown function	No change in tolerance to azoles
CAGL0K03553g	FOL3	-1.20867	0.319252	-2.41733	Ortholog(s) have dihydrofolate synthase activity, role in folic acid-containing compound biosynthetic process and cytoplasm localization	No change in tolerance to azoles
CAGL0M06149g		-1.2035	0.0208923	-2.407	Ortholog(s) have role in endoplasmic reticulum to Golgi vesicle-mediated transport and P-body, endoplasmic reticulum membrane, extrinsic component of membrane localization	Not tested
CAGL0F04741g		-1.19921	0.609106	-2.39843	Ortholog(s) have calmodulin binding, calmodulin-dependent protein kinase activity, protein kinase activity	Not tested
CAGL0I09966g		-1.19422	0.525426	-2.38843	Ortholog of S. cerevisiae AIM39	Not tested
CAGL0K01045g		-1.19152	0.397158	-2.38303	Ortholog(s) have enzyme regulator activity, guanyl-nucleotide exchange factor activity, translation initiation factor activity and role in cytoplasmic translational initiation, regulation of translational initiation	No change in tolerance to azoles
CAGL0K05027g		-1.18992	0.130988	-2.37983	Ortholog(s) have DNA replication origin binding, adenylosuccinate synthase activity, sulfinylpropanyl adenylate synthase activity	No change in tolerance to azoles
CAGL0K08844g		-1.18775	0.0222227	-2.3755	Ortholog(s) have gamma-butyrobetaine dioxygenase activity and role in carnitine biosynthetic process, mitochondrion organization	Not tested
CAGL0G01903g	MET1	-1.18592	1.38975	-2.37183	Ortholog(s) have uroporphyrin-III C-methyltransferase activity and role in cellular response to drug, methionine biosynthetic process, siroheme biosynthetic process	Not tested
CAGL0E00187g		-1.18261	0.565045	-2.36522	Putative adhesin-like protein; belongs to adhesin cluster IV	No change in tolerance to azoles
CAGL0M01760g	CDR1	-1.18261	0.796707	-2.36522	Multidrug transporter of ATP-binding cassette (ABC) superfamily, involved in resistance to azoles; expression regulated by Pdr1p; increased abundance in azole resistant strains; expression increased by loss of the mitochondrial genome	Deletion results in increased susceptibility
CAGL0K10604g		-1.18169	0.372865	-2.36338	Ortholog(s) have calmodulin-dependent protein kinase activity and role in protein phosphorylation, signal transduction	Not tested
CAGL0A00737g		-1.1791	0.364164	-2.3582	Has domain(s) with predicted transmembrane transporter activity, role in transmembrane transport and integral component of membrane, membrane localization	No change in tolerance to azoles
CAGL0F07975g		-1.17626	0.558553	-2.35252	0	No change in tolerance to azoles
CAGL0D00660g		-1.16812	0.333811	-2.33624	Ortholog(s) have MAP-kinase scaffold activity and role in negative regulation of MAP kinase activity, osmosensory signaling pathway via Sho1 osmosensor	Not tested
CAGL0F06369g		-1.16537	0.522154	-2.33073	Protein of unknown function	No change in tolerance to azoles
CAGL0J01419g		-1.16374	0.188872	-2.32748	Ortholog(s) have role in eisosome assembly and eisosome localization	Not tested
CAGL0I04862g	SNQ2	-1.16214	0.276437	-2.32428	Predicted plasma membrane ATP-binding cassette (ABC) transporter, putative transporter involved in multidrug resistance; involved in Pdr1p-mediated azole resistance	Deletion results in increased susceptibility
CAGL0I10384g	TPO3	-1.16204	0.312143	-2.32409	Predicted polyamine transporter of the major facilitator superfamily; required for azole resistance	Deletion results in increased susceptibility
CAGL0K01001g		-1.1575	0.0851224	-2.315	Ortholog(s) have role in protein localization to plasma membrane, protein targeting to vacuole, receptor-mediated endocytosis, response to pheromone and actin cortical patch, cytosol, endosome, plasma membrane localization	No change in tolerance to azoles
CAGL0J07964g		-1.14879	0.333726	-2.29759	Ortholog(s) have role in ER-dependent peroxisome organization, retrograde vesicle-mediated transport, Golgi to endoplasmic reticulum and Dsl1/NZR complex, endoplasmic reticulum, nucleus, peroxisome localization	No change in tolerance to azoles
CAGL0L08888g		-1.14533	0.33993	-2.29066	Ortholog(s) have sphingolipid transporter activity, role in sphingolipid metabolic process and extracellular region, fungal-type vacuole membrane localization	Not tested
CAGL0C01947g		-1.14469	0.102952	-2.28939	Has domain(s) with predicted ATP binding, aminoacyl-tRNA ligase activity, glutamate-tRNA ligase activity, role in glutamyl-tRNA aminoacylation, tRNA aminoacylation, tRNA aminoacylation for protein translation and cytoplasm	No change in tolerance to azoles
CAGL0G09152g		-1.14435	0.537477	-2.28869	Ortholog(s) have role in cellular response to oxidative stress and mitochondrion localization	Not tested
CAGL0F05115g		-1.14245	0.680738	-2.2849	Ortholog(s) have plasma membrane localization	Not tested
CAGL0I07953g		-1.14215	0.140313	-2.2843	Ortholog(s) have phosphatidylinositol-4,5-bisphosphate binding activity and role in establishment or maintenance of actin cytoskeleton polarity, fungal-type cell wall organization, regulation of cell growth	Not tested
CAGL0G01386g		-1.13986	0.315625	-2.27972	Ortholog(s) have role in actin cytoskeleton organization, actin filament bundle assembly, eisosome assembly, endosomal transport and establishment or maintenance of actin cytoskeleton polarity	Not tested
CAGL0H00847g		-1.13909	0.404738	-2.27818	Ortholog(s) have UDP-galactose transmembrane transporter activity and role in UDP-galactose transmembrane transport, UDP-glucose transmembrane transport	Deletion results in increased tolerance
CAGL0F02013g		-1.13737	0.104916	-2.27474	Ortholog(s) have nucleus localization	Not tested
CAGL0I06380g	RPM2	-1.13539	0.409821	-2.27079	Putative mitochondrial RNase P precursor; gene used for molecular typing of C. glabrata strain isolates	Deletion results in increased tolerance
CAGL0M02783g		-1.13343	0.284701	-2.26686	Has domain(s) with predicted DNA binding activity, role in nucleosome assembly and nucleosome, nucleus localization	Not tested
CAGL0B04785g		-1.13114	0.468055	-2.26229	Protein of unknown function	Not tested
CAGL0G01122g		-1.12864	0.739459	-2.25728	Putative protein; gene is upregulated in azole-resistant strain	Not tested
CAGL0K00473g		-1.12643	0.495809	-2.25287	Ortholog(s) have Ran GTPase binding activity, role in tRNA export from nucleus, tRNA re-export from nucleus and cytoplasm, nuclear matrix localization	Not tested
CAGL0I09856g		-1.12588	0.559494	-2.25176	Ortholog(s) have role in mitotic cell cycle, pseudohyphal growth and nucleus localization	Not tested
CAGL0K12056g		-1.12515	0.448404	-2.25029	Ortholog(s) have structural constituent of ribosome activity and mitochondrial ribosome, mitochondrial small ribosomal subunit localization	Deletion results in increased tolerance
CAGL0A01782g	HXT4	-1.12313	0.25456	-2.24625	Ortholog(s) have glucose transmembrane transporter activity, pentose transmembrane transporter activity and plasma membrane localization	Not tested
CAGL0G01628g		-1.1223	0.208242	-2.24459	Ortholog(s) have role in single-species biofilm formation on inanimate substrate and cytosol, nucleus localization	Deletion results in increased tolerance
CAGL0I02420g		-1.1214	0.527356	-2.24281	Ortholog(s) have Atg12 activating enzyme activity, Atg8 activating enzyme activity	Not tested
CAGL0M08624g		-1.11776	0.0162608	-2.23552	Ortholog(s) have tryptophan-tRNA ligase activity, role in mitochondrial tryptophanyl-tRNA aminoacylation and mitochondrion localization	Deletion results in increased tolerance
CAGL0J06908g		-1.1173	0.958538	-2.23459	Ortholog(s) have role in translational initiation and cytoplasm localization	Not tested
CAGL0G06996g		-1.11439	1.11057	-2.22877	Protein of unknown function	No change in tolerance to azoles
CAGL0C02365g		-1.11246	0.697704	-2.22491	Protein of unknown function	Not tested
CAGL0C02541g		-1.10881	0.625341	-2.21762	Ortholog(s) have TFIID-class transcription factor complex binding, chromatin binding, core promoter binding, lysine-acetylated histone binding activity	Deletion results in increased tolerance
CAGL0B03311g		-1.10669	1.07717	-2.21339	Ortholog(s) have ubiquitin-protein transferase activity, role in SCF-dependent proteasomal ubiquitin-dependent protein catabolic process and SCF ubiquitin ligase complex localization	Not tested
CAGL0G03509g		-1.1041	0.203792	-2.2082	Ortholog(s) have role in budding cell apical bud growth, cellular response to drug, regulation of cell shape, regulation of exocytosis, septum digestion after cytokinesis, vacuole organization	Not tested
CAGL0F08723g		-1.10347	0.05569	-2.20695	Ortholog(s) have ethanolamine-phosphate cytidylyltransferase activity and role in phosphatidylethanolamine biosynthetic process	Not tested
CAGL0F00759g		-1.10196	0.226851	-2.20392	Ortholog(s) have role in protein O-linked mannosylation and dolichyl-phosphate-mannose-protein mannosyltransferase Pmt1p-Pmt3p dimer complex, dolichyl-phosphate-mannose-protein mannosyltransferase Pmt5p-Pmt3p dimer complex localization	Not tested
CAGL0J01177g		-1.10143	0.669788	-2.20286	Has domain(s) with predicted DNA binding activity, role in chromatin remodeling and nucleus localization	No change in tolerance to azoles
CAGL0E01793g	YPS6	-1.0997	0.428247	-2.1994	Putative aspartic protease; predicted GPI-anchor; member of a YPS gene cluster that is required for virulence in mice; expression induced at high temperature	Not tested
CAGL0I08261g		-1.09608	0.177074	-2.19217	Ortholog(s) have RNA polymerase II complex recruiting activity, RNA polymerase II core promoter sequence-specific DNA binding, activating transcription factor binding activity	Not tested
CAGL0B02101g		-1.09583	0.044024	-2.19167	Ortholog(s) have phosphatidylinositol-3,5-bisphosphate binding, phosphatidylinositol-3-phosphate binding, phosphatidylinositol-4-phosphate binding, phosphatidylinositol-5-phosphate binding activity	Not tested
CAGL0C01331g		-1.09219	0.359031	-2.18439	Ortholog(s) have protein-histidine N-methyltransferase activity and role in peptidyl-histidine methylation, to form tele-methylhistidine, positive regulation of translational fidelity, ribosomal large subunit assembly	Deletion results in increased tolerance
CAGL0L02079g		-1.09116	0.0366163	-2.18232	Ortholog(s) have tricarboxylate secondary active transmembrane transporter activity, role in mitochondrial citrate transmembrane transport, transmembrane transport and plasma membrane localization	Not tested
CAGL0G05720g		-1.09091	0.470033	-2.18182	Ortholog(s) have role in hyperosmotic response, hyphal growth, negative regulation of conjugation with cellular fusion and negative regulation of transcription from RNA polymerase II promoter by pheromones, more	Not tested
CAGL0K00957g		-1.08641	0.131697	-2.17282	Ortholog(s) have microtubule binding activity, role in protein urmylation, regulation of transcription by RNA polymerase II, tRNA wobble uridine modification and Elongator holoenzyme complex, cytoplasm, nucleus localization	Not tested
CAGL0C01331g		-1.08136	0.276788	-2.16272	Ortholog(s) have protein-histidine N-methyltransferase activity and role in peptidyl-histidine methylation, to form tele-methylhistidine, positive regulation of translational fidelity, ribosomal large subunit assembly	No change in tolerance to azoles
CAGL0G03487g		-1.07003	0.482487	-2.14006	Ortholog(s) have role in cellular copper ion homeostasis, cellular response to drug, invasive growth in response to glucose limitation, pseudohyphal growth, vacuolar transport	Not tested
CAGL0D02266g		-1.06665	0.27024	-2.13329	Ortholog(s) have transcription factor TFIIH holo complex localization	Not tested
CAGL0K00891g		-1.06138	0.841641	-2.12276	Ortholog(s) have ATP binding activity	Not tested
CAGL0J05830g		-1.05518	0.576848	-2.11036	Ortholog of S. cerevisiae YNL144C	Not tested
CAGL0C05445g		-1.05313	0.321396	-2.10626	Ortholog(s) have role in endocytosis	Not tested
CAGL0E00737g		-1.05164	0.123746	-2.10328	Ortholog(s) have DNA binding, bending, double-stranded DNA binding, four-way junction DNA binding, sequence-specific DNA binding activity	Not tested
CAGL0E05632g		-1.04556	0.4146	-2.09113	Ortholog(s) have L-proline transmembrane transporter activity, neutral amino acid transmembrane transporter activity and role in gamma-aminobutyric acid transport, neutral amino acid transport, proline transport	Not tested
CAGL0L08712g		-1.03978	0.0749033	-2.07955	Ortholog(s) have cyclin-dependent protein serine/threonine kinase inhibitor activity and role in negative regulation of cyclin-dependent protein serine/threonine kinase activity	Not tested
CAGL0C03828g		-1.0376	0.261738	-2.0752	Ortholog(s) have ATP-dependent DNA/RNA helicase activity, GTPase activity, telomerase activity, telomeric DNA binding activity	Not tested
CAGL0C00209g	AWP7	-1.03636	0.538487	-2.07273	Putativn-like cell wall protein; belongs to adhesin cluster IV; predicted GPI-anchor	Not tested
CAGL0M07029g		-1.03024	0.298213	-2.06048	Ortholog(s) have RNA binding, chromatin binding, mRNA binding activity	Not tested
CAGL0H00308g		-1.02528	0.138907	-2.05056	Ortholog(s) have chromatin binding activity and role in positive regulation of transcription elongation from RNA polymerase II promoter	Not tested
CAGL0M02761g	TBF1	-1.02492	0.19097	-2.04983	Telomere repeat-binding factor	No change in tolerance to azoles
CAGL0G02585g	LYS12	-1.02442	0.284987	-2.04884	Homo-isocitrate dehydrogenase	Not tested
CAGL0K02739g		-1.02177	0.452859	-2.04355	Ortholog(s) have sphingosine N-acyltransferase activity and role in ceramide biosynthetic process, filamentous growth of a population of unicellular organisms, replicative cell aging, unidimensional cell growth	Not tested
CAGL0F04081g		-1.02109	0.746345	-2.04218	Has domain(s) with predicted DNA-binding transcription factor activity, role in regulation of transcription, DNA-templated and nucleus localization	Not tested
CAGL0B04939g		-1.02095	0.209422	-2.0419	Ortholog of S. cerevisiae YLR173W	Not tested
CAGL0K01067g		-1.01721	0.405634	-2.03442	Ortholog(s) have mitochondrion targeting sequence binding, protein transmembrane transporter activity	Not tested
CAGL0G06402g		-1.01628	0.914432	-2.03257	Ortholog(s) have mitochondrion localization	Not tested
CAGL0K01243g		-1.01209	0.355335	-2.02417	Ortholog(s) have structural constituent of ribosome activity and mitochondrial large ribosomal subunit, mitochondrial ribosome localization	Deletion results in increased tolerance
CAGL0D02948g	KAR2	-1.00991	0.218121	-2.01982	Protein with a predicted role in nuclear fusion	No change in tolerance to azoles
CAGL0B03047g	ILV5	-1.00982	0.25218	-2.01964	Ketol-acid reducto-isomerase; mass spectrometry data indicates this gene is likely to be protein-coding	No change in tolerance to azoles
CAGL0M00220g		-1.00916	0.024331	-2.01833	Ortholog(s) have dolichyl-phosphate-mannose-protein mannosyltransferase activity, mannosyltransferase activity	Not tested
CAGL0F02519g		-1.00706	0.532315	-2.01412	Has domain(s) with predicted DNA binding, DNA-binding transcription factor activity, RNA polymerase II-specific, zinc ion binding activity and role in regulation of transcription, DNA-templated, transcription, DNA-templated	Deletion results in increased susceptibility
CAGL0K00517g		-1.00473	0.0858459	-2.00945	Ortholog(s) have protein serine/threonine kinase activity	No change in tolerance to azoles
CAGL0K00429g		-1.00465	0.333608	-2.00931	Has domain(s) with predicted nucleotide binding activity	No change in tolerance to azoles
CAGL0E00231g		-1.00383	0.378049	-2.00766	Putative adhesin-like protein; contains tandem repeats and a predicted GPI-anchor; belongs to adhesin cluster III	Deletion results in increased susceptibility
CAGL0M04499g		-0.997261	0.429954	-1.99452	Ortholog(s) have proline dehydrogenase activity, role in proline catabolic process to glutamate and mitochondrion localization	Not tested
CAGL0L07898g		0.995356	0.0119994	1.99357	Ortholog(s) have role in interspecies interaction between organisms	Not tested
CAGL0G05049g		0.995613	0.09096	1.99393	Ortholog(s) have Arp2/3 complex binding activity, role in actin cortical patch assembly, actin filament debranching, negative regulation of Arp2/3 complex-mediated actin nucleation and actin cortical patch, cytoplasm localization	Not tested
CAGL0F06677g	GPA1	0.997672	0.0958424	1.99677	Ortholog(s) have G-protein beta-subunit binding, GTPase activity, guanyl nucleotide binding activity	Not tested
CAGL0K02541g		0.998963	0.148761	1.99856	Has domain(s) with predicted magnesium ion binding, ribose phosphate diphosphokinase activity and role in nucleoside metabolic process, nucleotide biosynthetic process	No change in tolerance to azoles
CAGL0D02090g	ASC1	1.00044	0.261381	2.00061	40S small subunit ribosomal protein	No change in tolerance to azoles
CAGL0H05973g		1.00471	0.439148	2.00654	Ortholog of S. cerevisiae YPL108W	No change in tolerance to azoles
CAGL0A01199g	DIP5	1.00691	0.133235	2.0096	Putative dicarboxylic amino acid permease	Not tested
CAGL0J03938g		1.00722	0.294008	2.01003	Unknown	Not tested
CAGL0M03949g		1.01104	0.145476	2.01537	Ortholog(s) have chaperone binding activity, role in mitochondrion organization, protein folding, protein import into mitochondrial matrix, protein stabilization, response to unfolded protein and mitochondrial matrix localization	No change in tolerance to azoles
CAGL0I07359g	INO4	1.0122	0.255823	2.01699	Transcriptional regulator involved in de novo inositol biosynthesis; activator of INO1 gene expression; mutants unable to grow in the absence of inositol	Not tested
CAGL0B00374g		1.01419	0.015305	2.01976	Ortholog(s) have RNA polymerase II regulatory region DNA binding activity and role in negative regulation of transcription by RNA polymerase II, pheromone-dependent signal transduction involved in conjugation with cellular fusion	Not tested
CAGL0J10494g		1.01455	0.18254	2.02028	Has domain(s) with predicted adenine phosphoribosyltransferase activity, role in adenine salvage, nucleoside metabolic process and cytoplasm localization	No change in tolerance to azoles
CAGL0J11528g		1.01518	0.00535779	2.02116	Unknown	Not tested
CAGL0C03784g		1.01655	0.473838	2.02308	Has domain(s) with predicted role in tRNA thio-modification and cytoplasm localization	Not tested
CAGL0I09152g		1.02419	0.124669	2.03381	Ortholog(s) have RNA binding, rRNA primary transcript binding, ribonuclease MRP activity, ribonuclease P activity	No change in tolerance to azoles
CAGL0I06050g	INO1	1.02692	0.771185	2.03767	Putative inositol 1-phosphate synthase; regulated by the transcriptional activators Ino2p and Ino4p; protein differentially expressed in azole resistant strain	Not tested
CAGL0G10021g		1.03187	0.129956	2.04467	Ortholog(s) have RNA polymerase II sequence-specific DNA-binding transcription factor recruiting activity and RNA polymerase III general transcription initiation factor activity	No change in tolerance to azoles
CAGL0G00946g		1.04	0.278068	2.05623	Has domain(s) with predicted thiol oxidase activity and role in oxidation-reduction process	Not tested
CAGL0I04180g	AMT1	1.04326	0.15027	2.06088	Metal-activated transcription factor; binds promoters of metallothionein genes; autoregulates its own expression; gene is downregulated in azole-resistant strain	Not tested
CAGL0F08525g		1.05073	0.34329	2.07158	Has domain(s) with predicted protein-lysine N-methyltransferase activity	Not tested
CAGL0D00748g		1.05222	0.144338	2.07372	Ortholog(s) have cytochrome-c oxidase activity, role in mitochondrial electron transport, cytochrome c to oxygen and mitochondrial respiratory chain complex IV, plasma membrane localization	Deletion results in increased tolerance
CAGL0J02794g		1.05518	0.0499602	2.07798	Ortholog(s) have cysteine desulfurase activity, role in iron-sulfur cluster assembly and L-cysteine desulfurase complex, extrinsic component of mitochondrial inner membrane, mitochondrial matrix localization	Not tested
CAGL0I09658g		1.05528	0.176594	2.07812	Ortholog(s) have role in actin filament bundle assembly and cellular bud neck, cellular bud tip localization	Not tested
CAGL0E04180g		1.05552	0.258416	2.07847	Has domain(s) with predicted role in dolichol-linked oligosaccharide biosynthetic process	No change in tolerance to azoles
CAGL0L04202g		1.05704	0.377087	2.08066	Ortholog(s) have ribosylnicotinamide kinase activity and role in NAD biosynthesis via nicotinamide riboside salvage pathway, NAD biosynthetic process, nicotinamide riboside metabolic process	Not tested
CAGL0I06270g		1.06055	0.411591	2.08573	Ortholog(s) have ubiquinol-cytochrome-c reductase activity and role in aerobic respiration, mitochondrial electron transport, ubiquinol to cytochrome c	No change in tolerance to azoles
CAGL0I01364g		1.06373	0.289055	2.09034	Ortholog(s) have first spliceosomal transesterification activity and role in cellular response to drug, generation of catalytic spliceosome for second transesterification step, mRNA 3'-splice site recognition	Not tested
CaglfMp05	Cgai1	1.06684	0.453194	2.09484	Putative endonuclease with similarity to S. cerevisiae AI3 (I-SceIII), encoded by the first exon and part of the first intron (a group I intron) in the mitochondrial COX1 gene	No change in tolerance to azoles
CAGL0C01325g		1.06691	0.0896211	2.09494	Ortholog(s) have cytochrome-c oxidase activity, nitrite reductase (NO-forming) activity and role in mitochondrial electron transport, cytochrome c to oxygen	No change in tolerance to azoles
CAGL0D06094g		1.06757	0.0718901	2.09589	Ortholog(s) have role in box C/D snoRNP assembly, maturation of LSU-rRNA from tricistronic rRNA transcript (SSU-rRNA, 5.8S rRNA, LSU-rRNA)	No change in tolerance to azoles
CAGL0J09372g		1.06856	0.484023	2.09734	Ortholog(s) have adenosine 5'-monophosphoramidase activity and role in nucleotide metabolic process	No change in tolerance to azoles
CAGL0C04367g		1.06965	0.0277316	2.09893	Unknown	Not tested
CAGL0H03201g		1.06967	0.211733	2.09896	Has domain(s) with predicted nucleic acid binding activity	No change in tolerance to azoles
CAGL0E06248g	RCN1	1.07136	0.347912	2.10142	Regulator of calcineurin; required for cell growth and activation of the calcineurin-Crz1 pathway in the presence of micafungin; activates calcineurin-dependent signaling	Deletion results in increased susceptibility
CAGL0E06512g		1.0782	0.198855	2.11139	Unknown	Not tested
CAGL0I05522g		1.08033	0.433833	2.11452	Has domain(s) with predicted thiol-dependent ubiquitinyl hydrolase activity and role in protein deubiquitination, ubiquitin-dependent protein catabolic process	Not tested
CAGL0A04389g		1.08292	0.442145	2.11831	Ortholog(s) have role in mitochondrial respiratory chain complex assembly and mitochondrial intermembrane space localization	No change in tolerance to azoles
CAGL0C02623g		1.0835	0.0749925	2.11917	Ortholog(s) have cytochrome-c oxidase activity, role in mitochondrial electron transport, cytochrome c to oxygen and mitochondrial respiratory chain complex IV, plasma membrane localization	Not tested
CAGL0H05335g		1.08472	0.0310844	2.12096	Ortholog(s) have mitochondrial outer membrane localization	Not tested
CaglfMp07_Cgai3	#N/A	1.08737	0.579945	2.12487	Unknown	No change in tolerance to azoles
CAGL0I04576g		1.09174	0.572176	2.13131	Ortholog(s) have anaphase-promoting complex localization	No change in tolerance to azoles
CAGL0K05357g	GLN1	1.09198	0.688254	2.13167	Ortholog(s) have glutamate-ammonia ligase activity, role in ammonia assimilation cycle, glutamine biosynthetic process, nitrogen compound metabolic process and nuclear periphery localization	No change in tolerance to azoles
CAGL0M05665g		1.09314	0.174615	2.13338	Ortholog(s) have endopeptidase inhibitor activity and role in regulation of proteolysis, vacuole fusion, non-autophagic	Not tested
CAGL0I08481g		1.09399	0.458831	2.13464	Ortholog(s) have structural constituent of ribosome activity	Deletion results in increased tolerance
CAGL0B01100g		1.09427	0.893697	2.13504	Phosphatidylethanolamine-binding protein	Not tested
CAGL0A01001g		1.09513	0.0413858	2.13633	Unknown	Not tested
CAGL0L04070g		1.09663	0.36053	2.13855	Ortholog(s) have structural constituent of ribosome activity and mitochondrial large ribosomal subunit, mitochondrion localization	Not tested
CAGL0G03135g		1.09937	0.176205	2.14261	Ortholog(s) have thiamine pyrophosphate transmembrane transporter activity, role in mitochondrial thiamine pyrophosphate transmembrane transport and integral component of mitochondrial inner membrane localization	Not tested
CAGL0J01331g		1.10246	0.848304	2.1472	Unknown	Not tested
CAGL0B02431g		1.10334	0.492071	2.14851	Ortholog(s) have NADH dehydrogenase (ubiquinone) activity and role in NADH oxidation, chronological cell aging, mitochondrial electron transport, NADH to ubiquinone, positive regulation of apoptotic process	Not tested
CAGL0C04829g		1.10521	0.410086	2.15129	Unknown	Not tested
CAGL0K03069g		1.10638	0.0322957	2.15304	Ortholog(s) have role in cellular response to DNA damage stimulus	Not tested
CAGL0M02629g		1.1144	0.487641	2.16506	Ortholog(s) have 2 iron, 2 sulfur cluster binding, ferrous iron binding, iron-sulfur cluster binding, iron-sulfur cluster carrier activity	Not tested
CAGL0M00484g		1.11568	0.249763	2.16697	Ortholog(s) have guanine phosphoribosyltransferase activity, hypoxanthine phosphoribosyltransferase activity, transferase activity, transferring pentosyl groups, xanthine phosphoribosyltransferase activity	Not tested
CAGL0C04719g		1.11571	0.335997	2.16701	Ortholog(s) have structural molecule activity	Not tested
CAGL0E04548g		1.11661	0.143297	2.16838	Ortholog of S. cerevisiae YOR020W-A	Not tested
CAGL0H04191g		1.11941	0.145011	2.17259	Ortholog(s) have proton-transporting ATP synthase activity, rotational mechanism activity and role in ATP synthesis coupled proton transport, mitochondrial proton-transporting ATP synthase complex assembly, protein complex oligomerization	Not tested
CAGL0J10604g		1.1232	0.328882	2.1783	Ortholog(s) have UDP-glycosyltransferase activity	No change in tolerance to azoles
CAGL0J07700g		1.12382	0.826479	2.17923	Ortholog(s) have role in mRNA splicing, via spliceosome and U2-type spliceosomal complex localization	Not tested
CAGL0B02409g		1.12386	0.0640126	2.17929	Ortholog of S. cerevisiae YML119W	Not tested
CAGL0M02365g		1.12438	0.261165	2.18009	Ortholog(s) have holo-[acyl-carrier-protein] synthase activity, role in protein-cofactor linkage and mitochondrion localization	Not tested
CAGL0C05115g	ARG1	1.12605	0.593753	2.1826	Argininosuccinate synthetase	Not tested
CAGL0H10274g		1.12766	0.012892	2.18504	Has domain(s) with predicted zinc ion binding activity	Not tested
CAGL0F04235g		1.12781	0.159061	2.18527	Ortholog(s) have microtubule binding activity, role in mitotic spindle elongation, negative regulation of microtubule motor activity and cellular bud neck, nuclear microtubule, spindle localization	Not tested
CAGL0J11088g		1.13306	0.226487	2.19323	Protein of unknown function	No change in tolerance to azoles
CAGL0J10494g		1.13338	0.169288	2.19372	Has domain(s) with predicted adenine phosphoribosyltransferase activity, role in adenine salvage, nucleoside metabolic process and cytoplasm localization	No change in tolerance to azoles
CAGL0K02035g		1.13421	0.33941	2.19499	Ortholog(s) have acid phosphatase activity, protein tyrosine phosphatase activity, metal-dependent activity	Not tested
CAGL0A00341g		1.13487	0.687345	2.19598	Ortholog(s) have role in sphingoid catabolic process	Not tested
CAGL0B04455g		1.14035	0.564133	2.20434	Ortholog(s) have L-glutamine transmembrane transporter activity, L-isoleucine transmembrane transporter activity, L-tyrosine transmembrane transporter activity and role in amino acid transmembrane export from vacuole	Not tested
CAGL0F06699g		1.14051	0.563894	2.20459	Protein of unknown function	No change in tolerance to azoles
CAGL0A01650g		1.14099	0.728379	2.20533	Putative protein; gene is upregulated in azole-resistant strain	Not tested
CAGL0B00836g		1.14286	0.403257	2.20819	Ortholog(s) have peptide-methionine (R)-S-oxide reductase activity, role in cellular response to oxidative stress and mitochondrion localization	Not tested
CAGL0J08547g		1.14731	0.218709	2.21501	Protein of unknown function	Not tested
CAGL0I09108g		1.14799	0.106084	2.21605	Has domain(s) with predicted role in transmembrane transport and integral component of membrane localization	No change in tolerance to azoles
CAGL0L06138g	TPN1	1.14878	0.0925976	2.21727	Ortholog(s) have vitamin transmembrane transporter activity, role in vitamin transport and plasma membrane localization	Not tested
CAGL0D06512g		1.1496	1.25377	2.21853	Putative membrane bound guanine nucleotide exchange factor; gene is upregulated in azole-resistant strain	Not tested
CAGL0G09064g		1.15175	0.918154	2.22183	Ortholog(s) have role in glycerol biosynthetic process and cytosol, nucleus localization	Not tested
CAGL0H06237g		1.1565	0.494608	2.22916	Ortholog(s) have role in ascospore wall assembly and ascospore wall, prospore membrane localization	Not tested
CAGL0F00341g		1.15992	0.382475	2.23446	Protein of unknown function	Not tested
CAGL0F06611g		1.161	0.0758743	2.23613	Ortholog of S. cerevisiae SOV1	Deletion results in increased tolerance
CAGL0A01111g		1.16234	0.195185	2.23821	Ortholog(s) have ATPase activity, proton-transporting ATP synthase activity, rotational mechanism activity, role in ATP synthesis coupled proton transport and mitochondrial proton-transporting ATP synthase, central stalk localization	Not tested
CAGL0G10065g		1.16726	0.314146	2.24585	Ortholog(s) have myosin II heavy chain binding, myosin binding activity and role in actomyosin contractile ring contraction, mitotic actomyosin contractile ring contraction, positive regulation of actin filament-based movement	Not tested
CAGL0F00715g		1.17326	1.34506	2.25521	Protein of unknown function	Not tested
CAGL0L11990g		1.17702	0.720343	2.2611	Ortholog(s) have RNA polymerase II activating transcription factor binding, disulfide oxidoreductase activity	Not tested
CAGL0L07260g		1.17775	0.295778	2.26223	Ortholog(s) have role in mRNA splicing, via spliceosome and U4/U6 x U5 tri-snRNP complex localization	No change in tolerance to azoles
CAGL0C01595g		1.17819	0.0304594	2.26292	Ortholog(s) have glutaminase activity, imidazoleglycerol-phosphate synthase activity and role in histidine biosynthetic process	Not tested
CAGL0K10142g		1.18542	0.0979222	2.2743	Ortholog(s) have role in DNA recombinase assembly, maintenance of rDNA, recombinational repair and Shu complex, site of double-strand break localization	Not tested
CAGL0A03498g		1.19125	0.00859956	2.2835	Ortholog(s) have bubble DNA binding, heteroduplex DNA loop binding activity, role in mismatch repair, reciprocal meiotic recombination and MutLbeta complex, nucleus localization	Not tested
CAGL0I06721g		1.19161	0.672976	2.28408	Ortholog(s) have RNA binding, poly(U) RNA binding activity and Lsm1-7-Pat1 complex, U4/U6 x U5 tri-snRNP complex, U6 snRNP, nucleolus localization	Deletion results in increased tolerance
CAGL0G02535g		1.19192	0.00486467	2.28457	Ortholog(s) have chromatin DNA binding activity	Not tested
CAGL0F01947g	IRC15	1.19485	0.141455	2.2892	Ortholog(s) have extracellular region, mitochondrion localization	Not tested
CAGL0I08305g		1.19635	1.09441	2.29159	Ortholog(s) have carnitine O-acetyltransferase activity	Not tested
CAGL0L02717g		1.19926	0.0138414	2.29622	Unknown	Not tested
CAGL0J01800g		1.20027	0.289587	2.29783	Putative adhesin-like protein; belongs to adhesin cluster VI	Not tested
CAGL0K12210g		1.20143	0.086297	2.29967	Ortholog(s) have organic acid transmembrane transporter activity, role in mitochondrial transport, transmembrane transport and mitochondrion localization	Not tested
CAGL0F04807g		1.2023	0.67909	2.30106	Ortholog(s) have role in pathogenesis and cell surface, hyphal cell wall, integral component of mitochondrial outer membrane, membrane, mitochondrial outer membrane, mitochondrion, plasma membrane localization	Not tested
CAGL0A01628g	MIG1	1.20833	1.29522	2.3107	Transcriptional regulatory protein	Deletion results in increased susceptibility
CAGL0I09592g		1.21313	0.0579941	2.31841	Ortholog(s) have carbamoyl-phosphate synthase (glutamine-hydrolyzing) activity, role in arginine biosynthetic process and carbamoyl-phosphate synthase complex, cytoplasmic stress granule localization	Not tested
CAGL0L09537g		1.21337	0.487	2.31879	Has domain(s) with predicted FMN binding, catalytic activity, oxidoreductase activity and role in oxidation-reduction process	Not tested
CAGL0H09328g		1.21822	0.675392	2.32659	Ortholog(s) have ubiquinol-cytochrome-c reductase activity and role in aerobic respiration, mitochondrial electron transport, ubiquinol to cytochrome c, mitochondrial respiratory chain complex III assembly	Not tested
CAGL0L06776g		1.21872	0.0747209	2.3274	Has domain(s) with predicted DNA-binding transcription factor activity, sequence-specific DNA binding, zinc ion binding activity and role in regulation of transcription	Not tested
CAGL0D05632g		1.22177	1.27656	2.33233	Ortholog(s) have copper chaperone activity, role in mitochondrial respiratory chain complex IV assembly, protein maturation by copper ion transfer and cytosol, mitochondrial intermembrane space localization	Deletion results in increased tolerance
CAGL0G08129g		1.22649	0.0729951	2.33997	Ortholog(s) have ATP binding, ATPase activity, four-way junction DNA binding, guanine/thymine mispair binding, single base insertion or deletion binding activity	Not tested
CAGL0D04686g		1.22891	1.2436	2.3439	Ortholog(s) have metalloendopeptidase activity and role in axial cellular bud site selection, cytogamy, peptide mating pheromone maturation involved in positive regulation of conjugation with cellular fusion	Not tested
CAGL0D05148g		1.233	0.0772975	2.35055	Protein of unknown function	Not tested
CAGL0L04664g	HEM15	1.23731	0.414024	2.35758	Ortholog(s) have 2 iron, 2 sulfur cluster binding, ferrochelatase activity, role in heme biosynthetic process and mitochondrial inner membrane localization	No change in tolerance to azoles
CAGL0C02101g		1.23783	0.00350013	2.35843	Ortholog(s) have role in (1->6)-beta-D-glucan biosynthetic process, chromosome organization and integral component of endoplasmic reticulum membrane localization	No change in tolerance to azoles
CAGL0M06985g		1.23789	0.206472	2.35853	Ortholog(s) have L-cystine transmembrane transporter activity, role in L-cystine transport and endosome, fungal-type vacuole, plasma membrane localization	Not tested
CAGL0C01793g		1.24229	0.154544	2.36574	Protein of unknown function	Not tested
CAGL0G08019g		1.24517	0.380263	2.37046	Ortholog(s) have role in cellular response to starvation, filamentous growth of a population of unicellular organisms in response to biotic stimulus, filamentous growth of a population of unicellular organisms in response to starvation	Not tested
CAGL0A03036g		1.24831	0.280425	2.37562	Ortholog(s) have ATPase activity, proton-transporting ATP synthase activity, rotational mechanism activity and role in ATP synthesis coupled proton transport	No change in tolerance to azoles
CAGL0H09636g		1.24935	0.070852	2.37735	Ortholog(s) have 4-hydroxy-4-methyl-2-oxoglutarate aldolase activity, oxaloacetate decarboxylase activity and role in 3,4-dihydroxybenzoate catabolic process	Not tested
CAGL0A03476g	SMF3	1.25995	0.326289	2.39487	Ortholog(s) have role in cellular iron ion homeostasis, iron ion transport and fungal-type vacuole membrane, plasma membrane localization	Not tested
CAGL0J11968g	EPA15	1.26977	0.143312	2.41123	Putative adhesin-like cell wall protein; belongs to adhesin cluster I	Not tested
CAGL0I00308g		1.27052	0.385277	2.41249	Ortholog(s) have role in DNA recombination, filamentous growth of a population of unicellular organisms, growth of unicellular organism as a thread of attached cells and meiotic gene conversion	Not tested
CAGL0J06088g		1.27063	0.294837	2.41267	Ortholog of S. cerevisiae YNL162W-A	Not tested
CAGL0K04235g		1.274	0.5261	2.41831	Putative transaldolase	Not tested
CAGL0M14069g	PWP6	1.27689	0.448585	2.42316	Adhesin-like protein with similarity to S. cerevisiae flocculins, cell wall proteins that mediate adhesion; predicted GPI anchor; belongs to adhesin cluster II	Not tested
CAGL0K09020g		1.27981	0.365543	2.42807	Ortholog(s) have peptide alpha-N-acetyltransferase activity, role in N-terminal protein amino acid acetylation and NatA complex localization	Not tested
CAGL0L05676g		1.28226	0.372676	2.4322	Ortholog(s) have GMP synthase (glutamine-hydrolyzing) activity, aspartate carbamoyltransferase activity, carbamoyl-phosphate synthase (glutamine-hydrolyzing) activity	Not tested
CAGL0I04328g		1.29395	0.643246	2.45199	Ortholog of S. cerevisiae YJL133C-A	Not tested
CAGL0F05709g		1.29637	0.404445	2.45611	Ortholog(s) have role in bipolar cellular bud site selection, cellular cation homeostasis and nucleus localization	Not tested
CAGL0A01716g		1.30745	0.651609	2.47504	Ortholog(s) have nicotinamidase activity and role in chromatin silencing at rDNA, chromatin silencing at telomere, negative regulation of DNA amplification, replicative cell aging	Not tested
CAGL0K05687g		1.31157	1.36623	2.48212	Has domain(s) with predicted FMN binding, catalytic activity, oxidoreductase activity and role in oxidation-reduction process	Not tested
CAGL0D01232g		1.31173	0.58116	2.48238	Ortholog(s) have signal sequence binding activity, role in vacuolar transport and late endosome localization	Not tested
CAGL0M09229g		1.31369	0.06737	2.48577	Has domain(s) with predicted membrane localization	Not tested
CAGL0H10076g		1.31414	0.560473	2.48654	Ortholog(s) have plasma membrane localization	Not tested
CAGL0J01914g		1.31557	0.0399423	2.489	Ortholog(s) have first spliceosomal transesterification activity	Not tested
CAGL0I10923g		1.31724	0.652236	2.49189	Ortholog(s) have role in protein lipoylation	Deletion results in increased susceptibility
CAGL0F05203g	RIB7	1.32631	0.191148	2.5076	Putative 2,5-diamino-6-ribitylamino-4(3H)-pyrimidinone 5'-phosphate synthase involved in riboflavin (vitamin B2) biosynthesis	No change in tolerance to azoles
CAGL0G02057g		1.34164	0.345021	2.5344	Ortholog of S. cerevisiae YKR075C	Not tested
CAGL0A04433g		1.34533	0.293171	2.54088	Ortholog(s) have thioredoxin peroxidase activity and role in cell redox homeostasis, cellular response to oxidative stress, response to cadmium ion, sporocarp development involved in sexual reproduction	Not tested
CAGL0D02134g		1.3468	0.195102	2.54347	Ortholog of S. cerevisiae YKL133C	Not tested
CAGL0I05390g		1.34976	0.974264	2.5487	Ortholog(s) have protein kinase activity, protein serine/threonine kinase activity	Not tested
CAGL0E03630g		1.3499	0.2569	2.54895	Ortholog(s) have RNA binding activity and role in meiotic cell cycle, premeiotic DNA replication, reciprocal meiotic recombination, sporulation resulting in formation of a cellular spore	Not tested
CAGL0H02563g		1.3563	0.825183	2.56028	Predicted GPI-linked protein	Not tested
CAGL0M12925g		1.35727	0.0945291	2.562	Putative 2-deoxyglucose-6-phosphate phosphatase; gene is downregulated in azole-resistant strain	Not tested
CAGL0K04565g		1.37223	0.236415	2.5887	Ortholog(s) have biotin transmembrane transporter activity, role in biotin transport and plasma membrane localization	Not tested
CAGL0H04917g		1.39308	0.282956	2.6264	Protein of unknown function	No change in tolerance to azoles
CAGL0M12551g		1.39744	1.92482	2.63433	Ortholog(s) have role in energy reserve metabolic process	Not tested
CAGL0K08536g	APE1	1.40698	0.738558	2.65182	Unknown	Not tested
CAGL0G01562g		1.4122	0.247692	2.66143	Ortholog(s) have phosphatidylinositol N-acetylglucosaminyltransferase activity and role in GPI anchor biosynthetic process	Not tested
CAGL0F07953g		1.41817	0.855886	2.67246	Ortholog of S. cerevisiae SPG1	Not tested
CAGL0L10934g		1.42843	0.575865	2.69155	Ortholog(s) have tRNA binding, tRNA dimethylallyltransferase activity, role in tRNA modification, transfer RNA gene-mediated silencing and cytosol, mitochondrion, nucleolus, nucleus localization	No change in tolerance to azoles
CAGL0M00132g	EPA12	1.43029	0.110388	2.695	Putative adhesin-like cell wall protein; belongs to adhesin cluster I	Not tested
CAGL0L10406g	CYT1	1.43402	0.84036	2.70198	Ortholog(s) have electron transporter, transferring electrons within CoQH2-cytochrome c reductase complex activity and role in mitochondrial electron transport, ubiquinol to cytochrome c	No change in tolerance to azoles
CAGL0L02981g		1.43791	0.484595	2.70928	Ortholog(s) have role in spliceosomal complex disassembly and U2-type post-mRNA release spliceosomal complex, spliceosomal complex localization	No change in tolerance to azoles
CAGL0B01265g	MATalpha	1.43957	0.0123506	2.7124	Mating-type regulatory protein alpha2; expressed in all MTLalpha strains and not in MTLa strains	Not tested
CAGL0M12430g	RHR2	1.44755	0.410874	2.72745	Putative DL-glycerol phosphatase	Not tested
CAGL0H05225g		1.45386	0.114054	2.73939	Ortholog(s) have role in N-acetylglucosamine metabolic process and cytoplasm localization	Not tested
CAGL0H02491g		1.46534	0.0884085	2.76129	Ortholog(s) have cytochrome-c oxidase activity, role in mitochondrial electron transport, cytochrome c to oxygen and mitochondrial respiratory chain complex IV, plasma membrane localization	No change in tolerance to azoles
CAGL0K04939g		1.48811	0.289136	2.8052	Ortholog(s) have endopolyphosphatase activity, role in polyphosphate catabolic process and fungal-type vacuole, vacuolar lumen localization	Not tested
CAGL0M01276g		1.496	0.0101918	2.8206	Ortholog(s) have double-stranded DNA-dependent ATPase activity, role in mitochondrial DNA metabolic process and mitochondrial matrix localization	Not tested
CAGL0J07084g		1.51917	0.52224	2.86627	Ortholog(s) have oxidoreductase activity, acting on the CH-OH group of donors, NAD or NADP as acceptor activity	Not tested
CAGL0I10747g		1.51948	1.01172	2.86688	Ortholog(s) have ammonium transmembrane transporter activity, role in ammonium transport, nitrogen utilization and plasma membrane localization	Not tested
CAGL0G05610g		1.52658	0.592666	2.88101	Ortholog(s) have D-leucyl-tRNA(Leu) deacylase activity, D-tyrosyl-tRNA(Tyr) deacylase activity and role in D-leucine catabolic process, D-tyrosine catabolic process, tRNA metabolic process	Not tested
CAGL0E05456g		1.53024	0.1881	2.88833	Unknown	Not tested
CAGL0C01243g		1.53198	0.223656	2.89182	Ortholog(s) have histidinol-phosphate transaminase activity and role in histidine biosynthetic process, response to nickel cation	Not tested
CAGL0D02552g		1.53848	0.0249794	2.90488	Protein of unknown function	Not tested
CAGL0G02101g	ECM4	1.54055	0.313544	2.90906	Putative omega class glutathione transferase; gene is downregulated in azole-resistant strain	Not tested
CAGL0L03828g		1.54448	0.238942	2.91698	Ortholog(s) have electron transfer activity, role in ergosterol biosynthetic process, sterol biosynthetic process and endoplasmic reticulum membrane localization	No change in tolerance to azoles
CAGL0J03146g		1.55227	0.622361	2.93279	Ortholog(s) have CDP reductase activity, nucleoside diphosphate kinase activity, nucleotide binding, ribonucleoside-diphosphate reductase activity, thioredoxin disulfide as acceptor activity	No change in tolerance to azoles
CAGL0F04521g		1.55431	0.949664	2.93694	Ortholog of S. cerevisiae ECM13	Not tested
CAGL0M13739g	ATM1	1.56618	0.0456578	2.96119	Ortholog(s) have ATPase activity, coupled to transmembrane movement of substances activity, role in iron import into the mitochondrion, iron-sulfur cluster assembly and mitochondrial inner membrane, mitochondrion localization	Not tested
CaglfMp08	ATP8	1.61894	0.815557	3.07149	Unknown	No change in tolerance to azoles
CAGL0K03459g		1.62362	0.87851	3.08147	Ortholog of S.cerevisiae YMR107W	Not tested
CAGL0C05027g		1.62867	0.977627	3.09228	Ortholog(s) have role in acetate catabolic process, carnitine metabolic process, cellular respiration and cytosol, mitochondrion localization	Not tested
CAGL0M11066g		1.65061	0.103666	3.13966	Ortholog(s) have cyclin-dependent protein serine/threonine kinase regulator activity	Not tested
CAGL0K06259g	TSA1	1.6659	0.858707	3.17311	Thiol-specific antioxidant protein; predicted thioredoxin peroxidase involved in oxidative stress response; protein abundance decreased in ace2 mutant cells	Not tested
CAGL0B04675g		1.69899	0.242994	3.24673	Ortholog(s) have RNA binding, endoribonuclease activity, ribosome binding activity	Not tested
CAGL0L07326g	DUN1	1.69944	0.165508	3.24775	Ortholog(s) have protein kinase activity, protein serine/threonine kinase activity	Not tested
CAGL0K01661g		1.70673	0.0255789	3.26419	Ortholog(s) have cell periphery, cellular bud neck localization	Not tested
CAGL0B01727g		1.722	0.626356	3.29894	Ortholog(s) have D-ribulokinase activity and role in pentose metabolic process	Not tested
CAGL0K09372g		1.73497	0.130845	3.32873	Ortholog(s) have DNA-binding transcription repressor activity, RNA polymerase II-specific, RNA polymerase II proximal promoter sequence-specific DNA binding activity	Not tested
CAGL0E05258g		1.74618	0.0962911	3.35468	Ortholog(s) have SNAP receptor activity, role in Golgi to plasma membrane transport, endocytosis, exocytosis, vesicle fusion and SNARE complex, endosome, trans-Golgi network, transport vesicle membrane localization	Not tested
CAGL0G04433g		1.7472	0.199735	3.35706	Unknown	Not tested
CAGL0L04686g		1.74734	0.411455	3.3574	Ortholog(s) have phospholipase A2 activity, role in cardiolipin acyl-chain remodeling, cardiolipin metabolic process and mitochondrial inner membrane, mitochondrion localization	Not tested
CAGL0I02794g		1.76146	0.629312	3.39041	Ortholog of S. cerevisiae YOR114W	Not tested
CAGL0L04422g		1.76174	0.318123	3.39107	Ortholog(s) have bis(5'-adenosyl)-hexaphosphatase activity, bis(5'-adenosyl)-pentaphosphatase activity, diphosphoinositol-polyphosphate diphosphatase activity and endopolyphosphatase activity, more	Not tested
CAGL0H03971g		1.79253	0.361101	3.46421	Ortholog(s) have role in cellular response to oxidative stress, pathogenesis and cytoplasm, membrane raft, plasma membrane localization	Not tested
CAGL0I10791g		1.79382	0.00232187	3.46733	Ortholog(s) have ornithine carbamoyltransferase activity, role in arginine biosynthetic process, arginine biosynthetic process via ornithine, asexual sporulation and mitochondrial matrix, mitochondrion localization	Not tested
CAGL0A02002g		1.79633	2.35753	3.47334	Ortholog of S. cerevisiae YOL024W	Not tested
CAGL0A03905g	HMX1	1.80123	0.0462595	3.48517	Ortholog(s) have heme oxygenase (decyclizing) activity and role in cellular iron ion homeostasis, heme catabolic process, response to carbon monoxide, response to oxidative stress	Not tested
CAGL0L05720g		1.80664	0.635546	3.49827	Ortholog(s) have membrane localization	Not tested
CaglfMp09	ATP6	1.81788	0.992283	3.52562	Unknown	No change in tolerance to azoles
CAGL0D06578g		1.81906	0.0243236	3.52852	Ortholog(s) have copper ion binding activity, role in metal ion transport, mitochondrial respiratory chain complex IV assembly and cytosol, mitochondrial intermembrane space localization	No change in tolerance to azoles
CAGL0L06864g		1.83197	1.69903	3.56024	Putative protein related to ECM3; gene is downregulated in azole-resistant strain	Not tested
CAGL0G04455g		1.84146	0.606597	3.58373	Ortholog(s) have protein kinase activity, role in cellular response to drug, negative regulation of DNA replication origin binding, protein phosphorylation, regulation of meiotic nuclear division and nucleus localization	Not tested
CaglfMp04	COX1	1.86569	1.14855	3.64442	Unknown	No change in tolerance to azoles
CAGL0M08514g	PIR5	1.87128	0.0187489	3.65856	Pir protein family member, putative cell wall component	Not tested
CAGL0I05610g		1.88276	1.83435	3.6878	Ortholog of S. cerevisiae YNR014W	Not tested
CAGL0K07678g		1.89669	0.530678	3.72358	Protein of unknown function	No change in tolerance to azoles
CAGL0H02101g		1.90651	2.45487	3.74902	Ortholog(s) have role in RNA metabolic process and fungal biofilm matrix localization	Not tested
CAGL0H04939g		1.91308	0.635432	3.76613	Ortholog(s) have fructose 1,6-bisphosphate 1-phosphatase activity, role in gluconeogenesis, reactive oxygen species metabolic process and cytosol, periplasmic space localization	Not tested
CAGL0G04763g		1.93267	1.27341	3.8176	Has domain(s) with predicted role in termination of G protein-coupled receptor signaling pathway	Not tested
CAGL0I09724g		1.94117	0.595104	3.84017	Has domain(s) with predicted role in transmembrane transport and integral component of membrane localization	Not tested
CAGL0G06182g		1.96222	0.778146	3.89662	Unknown	Not tested
CAGL0K12254g		1.97518	1.02791	3.93176	Ortholog(s) have role in negative regulation of gluconeogenesis, proteasome-mediated ubiquitin-dependent protein catabolic process, protein catabolic process in the vacuole, protein targeting to vacuole	Not tested
CAGL0E04356g		1.99885	0.284314	3.99682	Ortholog(s) have manganese ion binding, superoxide dismutase activity	Not tested
CAGL0A01606g		2.01502	0.209048	4.04186	Ortholog(s) have double-stranded DNA binding activity, role in reciprocal meiotic recombination, synapsis and condensed nuclear chromosome localization	Not tested
CAGL0A00649g		2.02504	0.412908	4.07002	Protein of unknown function	Not tested
CAGL0L09273g		2.03345	0.685253	4.09384	Ortholog(s) have isocitrate lyase activity, methylisocitrate lyase activity, role in propionate catabolic process, 2-methylcitrate cycle and mitochondrial matrix, mitochondrion localization	Not tested
CAGL0C03223g		2.04151	0.940517	4.11676	Putative iron-sulfur protein subunit of succinate dehydrogenase; gene is downregulated in azole-resistant strain	Not tested
CAGL0M14091g		2.05617	1.24477	4.15881	Putative quinone reductase/NADPH dehydrogenase; gene is upregulated in azole-resistant strain	No change in tolerance to azoles
CAGL0M11660g		2.08677	0.53284	4.24796	Has domain(s) with predicted hydrolase activity 2010-10-21	Not tested
CAGL0G03289g	SSA3	2.11246	1.79208	4.32427	Heat shock protein of the HSP70 family	Not tested
CAGL0E00341g	MTL1a	2.13648	0.304345	4.39687	Mating type protein a1; differentially spliced transcript; expressed in both MATa and MATalpha strains	Not tested
CAGL0L10362g		2.17063	1.20717	4.50218	Ortholog of S. cerevisiae YOR062C	Not tested
CAGL0F07117g		2.17678	0.109949	4.52144	Putative subunit of the heterotrimeric G protein; gene is upregulated in azole-resistant strain	Not tested
CAGL0F05137g		2.21978	0.171049	4.65823	Ortholog(s) have cholesterol binding, sterol binding activity, role in pathogenesis, sterol transport and cell surface, extracellular region, yeast-form cell wall localization	Not tested
CAGL0E01815g	YPS8	2.23238	0.814858	4.69908	Putative aspartic protease; predicted GPI-anchor; member of a YPS gene cluster that is required for virulence in mice; induced in response to low pH and high temperature	Not tested
CAGL0H06017g	FLR1	2.24112	1.2841	4.72764	Multidrug transporter of the major facilitator superfamily involved in 5-flucytosine resistance; gene is downregulated in azole-resistant strain	Not tested
CAGL0D04356g		2.2416	0.0712533	4.7292	Ortholog(s) have glycine dehydrogenase (decarboxylating) activity and role in glycine metabolic process, one-carbon metabolic process	Not tested
CAGL0L08426g	SUE1	2.27981	0.262257	4.85614	Ortholog(s) have role in protein catabolic process and mitochondrial envelope localization	Not tested
CAGL0L13288g		2.30132	0.0822889	4.92908	Protein of unknown function	Not tested
CAGL0D05434g	ROX1	2.3096	0.783691	4.95747	Protein of unknown function	Not tested
CAGL0L00429g		2.31809	0.468611	4.98673	Ortholog(s) have glycine dehydrogenase (decarboxylating) activity and role in glycine decarboxylation via glycine cleavage system, one-carbon metabolic process	Not tested
CAGL0K10428g		2.36272	0.0330342	5.14338	Ortholog(s) have enzyme inhibitor activity and role in negative regulation of glycogen catabolic process	Not tested
CAGL0J00451g		2.37006	0.645653	5.16963	Putative glyceraldehyde-3-phosphate dehydrogenase; protein differentially expressed in azole resistant strain; expression downregulated in biofilm vs planktonic cell culture	No change in tolerance to azoles
CAGL0M02915g		2.37902	0.700573	5.20183	Ortholog(s) have role in autophagy of peroxisome and peroxisome localization	No change in tolerance to azoles
CAGL0G05269g		2.47982	0.845821	5.57826	Putative mitochondrial protein; gene is downregulated in azole-resistant strain	Not tested
[truncated: 25 more rows]

## Sheet: Table S9
Table S9. Comparative transcriptomic profiling of C. glabrata ISTB218 isolate, in comparison with the reference strain CBS138. Cells of both strains were cultivated as detailed in materials and methods and in this table are shown genes exhibiting a differential expression in the two strains above 2-fold. The effect of gene deletion in C. glabrata tolerance to azoles is also indicated based on pre…									A cinzento: genes que conferem resistência a azóis
[truncated: 554 more rows]

[truncated: 1 more sheets: Table S10]
